# Supplementary material for: New quinoxaline-2(1H)-ones as potential VEGFR-2 inhibitors: design, synthesis, molecular docking, ADMET profile and anti-proliferative evaluations
Source: Royal Society of Chemistry journal article supplement (doi:10.1039/d1nj02509k), 2021-01-01

## **New quinoxaline-2(1*H*)-ones as potential VEGFR-2 inhibitors: Design, synthesis, molecular docking, ADMET profile and anti-proliferative evaluations**

Reda G. Yousef<sup>a</sup>, Helmy M. Sakr<sup>a</sup>, Ibrahim H. Eissa<sup>a,\*</sup>, Ahmed. B. M. Mehany<sup>c</sup>, Ahmed. M. Metwaly<sup>d</sup>, Mostafa. A. Elhendawy<sup>e,f</sup>, Mohamed. M. Radwan<sup>f,g</sup>, Mahmoud. A. ElSohly<sup>\*f,h</sup>, Hamada S. Abulkhair<sup>i,j</sup>, Khaled. El-Adl<sup>a,b,\*</sup>

<sup>a</sup> Pharmaceutical Medicinal Chemistry and Drug Design Department, Faculty of Pharmacy (Boys), Al-Azhar University, Cairo 11884, Egypt.

<sup>b</sup> Pharmaceutical Chemistry Department, Faculty of Pharmacy, Heliopolis University for Sustainable Development, Cairo, Egypt.

<sup>c</sup> Zoology Department, Faculty of Science, Al-Azhar University, Cairo 11884, Egypt.

<sup>d</sup> Pharmacognosy Department, Faculty of Pharmacy (Boys), Al-Azhar University, Cairo 11884, Egypt.

<sup>e</sup> Department of Agriculture Chemistry, Faculty of Agriculture, Damietta University, Damietta, Egypt

<sup>f</sup> National Center for Natural Products Research, University of Mississippi, MS 38677, USA.

<sup>g</sup> Department of Pharmacognosy, Faculty of Pharmacy, Alexandria University, Alexandria, Egypt.

<sup>h</sup> Department of Pharmaceutics and Drug Delivery, University of Mississippi, University, MS 38677, USA.

<sup>i</sup> Pharmaceutical Organic Chemistry Department, Faculty of Pharmacy, Al-Azhar University, Nasr City 11884, Cairo, Egypt

<sup>j</sup> Pharmaceutical Chemistry Department, Faculty of Pharmacy, Horus University - Egypt, International Costal Road, New Damietta, Egypt

**\* Corresponding authors:**

### **Ibrahim H. Eissa**

Medicinal Chemistry Department, Faculty of Pharmacy (Boys), Al-Azhar University, Cairo 11884, Egypt.

**Email:** [Ibrahimeissa@azhar.edu.eg](mailto:Ibrahimeissa@azhar.edu.eg)

### **Khaled El-Adl**

Medicinal Chemistry Department, Faculty of Pharmacy (Boys), Al-Azhar University, Cairo 11884, Egypt.

**Emails:** [eladlkhaled74@yahoo.com](mailto:eladlkhaled74@yahoo.com); [eladlkhaled74@azhar.edu.eg](mailto:eladlkhaled74@azhar.edu.eg); [khaled.eladl@hu.edu.eg](mailto:khaled.eladl@hu.edu.eg)

## The expected ADMET study

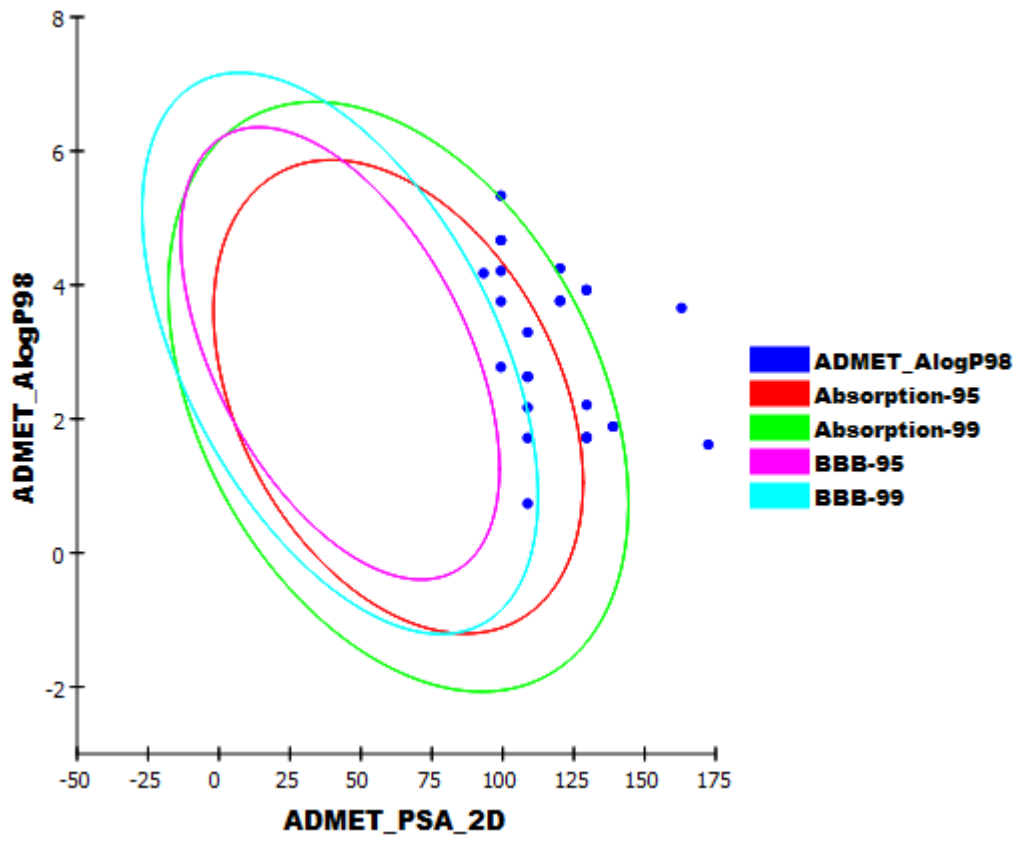

### Predicted ADMET for the designed compounds and reference drug

| Comp.            | BBB level <sup>a</sup> | Solubility level <sup>b</sup> | Absorption level <sup>c</sup> | CYP2D6 prediction <sup>d</sup> | PPB prediction <sup>e</sup> |
|------------------|------------------------|-------------------------------|-------------------------------|--------------------------------|-----------------------------|
| <b>11a</b>       | 3                      | 3                             | 0                             | FALSE                          | TRUE                        |
| <b>11b</b>       | 4                      | 2                             | 0                             | FALSE                          | TRUE                        |
| <b>11c</b>       | 4                      | 2                             | 0                             | FALSE                          | TRUE                        |
| <b>11d</b>       | 4                      | 2                             | 0                             | FALSE                          | TRUE                        |
| <b>11e</b>       | 4                      | 3                             | 1                             | FALSE                          | TRUE                        |
| <b>11f</b>       | 4                      | 3                             | 2                             | FALSE                          | TRUE                        |
| <b>11g</b>       | 4                      | 2                             | 2                             | FALSE                          | TRUE                        |
| <b>12</b>        | 4                      | 3                             | 1                             | FALSE                          | TRUE                        |
| <b>13</b>        | 4                      | 3                             | 0                             | FALSE                          | FALSE                       |
| <b>14</b>        | 4                      | 3                             | 0                             | FALSE                          | TRUE                        |
| <b>15</b>        | 3                      | 3                             | 0                             | FALSE                          | TRUE                        |
| <b>Sorafenib</b> | 4                      | 1                             | 0                             | FALSE                          | TRUE                        |

<sup>a</sup> BBB level, blood brain barrier level, 0 = very high, 1 = high, 2 = medium, 3 = low, 4 = very low.

<sup>b</sup> Solubility level, 1 = very low, 2 = low, 3 = good, 4 = optimal.

<sup>c</sup> Absorption level, 0 = good, 1 = moderate, 2 = poor, 3 = very poor.

<sup>d</sup> CYP2D6, cytochrome P2D6, TRUE = inhibitor, FALSE = non inhibitor.

<sup>e</sup> PBB, plasma protein binding, FALSE means less than 90%, TRUE means more than 90%

Toxicity properties of the synthesized compounds

| <b>Comp.</b>     | FDA Rodent Carcinogenicity (Mouse-Female) | Carcinogenic Potency TD <sub>50</sub> (Rat) <sup>a</sup> | Rat Maximum Tolerated Dose (Feed) <sup>b</sup> | Developmental Toxicity Potential | Rat Oral LD <sub>50</sub> <sup>b</sup> | Rat Chronic LOAEL <sup>b</sup> | Ocular Irritancy | Skin Irritancy |
|------------------|-------------------------------------------|----------------------------------------------------------|------------------------------------------------|----------------------------------|----------------------------------------|--------------------------------|------------------|----------------|
| <b>11a</b>       | Non-Carcinogen                            | 23.443                                                   | 0.067                                          | Non-Toxic                        | 2.730                                  | 0.244                          | Irritant         | Non-Irritant   |
| <b>11b</b>       | Non-Carcinogen                            | 6.212                                                    | 0.081                                          | Non-Toxic                        | 4.841                                  | 0.264                          | Irritant         | Non-Irritant   |
| <b>11c</b>       | Non-Carcinogen                            | 5.977                                                    | 0.081                                          | Non-Toxic                        | 2.881                                  | 0.155                          | Irritant         | Non-Irritant   |
| <b>11d</b>       | Non-Carcinogen                            | 5.977                                                    | 0.081                                          | Non-Toxic                        | 2.478                                  | 0.144                          | Irritant         | Non-Irritant   |
| <b>11e</b>       | Non-Carcinogen                            | 51.481                                                   | 0.220                                          | Non-Toxic                        | 2.539                                  | 0.347                          | Irritant         | Non-Irritant   |
| <b>11f</b>       | Non-Carcinogen                            | 4.715                                                    | 0.049                                          | Non-Toxic                        | 5.090                                  | 0.186                          | Irritant         | Non-Irritant   |
| <b>11g</b>       | Non-Carcinogen                            | 2.964                                                    | 0.059                                          | Non-Toxic                        | 5.866                                  | 0.098                          | Irritant         | Non-Irritant   |
| <b>12</b>        | Non-Carcinogen                            | 32.462                                                   | 0.087                                          | Non-Toxic                        | 0.936                                  | 0.212                          | Irritant         | Non-Irritant   |
| <b>13</b>        | Non-Carcinogen                            | 42.027                                                   | 0.087                                          | Non-Toxic                        | 0.656                                  | 0.227                          | Irritant         | Non-Irritant   |
| <b>14</b>        | Non-Carcinogen                            | 12.449                                                   | 0.054                                          | Non-Toxic                        | 4.518                                  | 0.220                          | Irritant         | Non-Irritant   |
| <b>15</b>        | Non-Carcinogen                            | 46.537                                                   | 0.161                                          | Non-Toxic                        | 3.627                                  | 0.391                          | Irritant         | Non-Irritant   |
| <b>Sorafenib</b> | Single-Carcinogen                         | 14.244                                                   | 0.089                                          | Toxic                            | 0.823                                  | 0.005                          | Irritant         | Non-Irritant   |

<sup>a</sup> Unit: mg/kg body weight/day

<sup>b</sup> Unit: g/kg body weight

# H<sup>1</sup>NMR of compound (7)

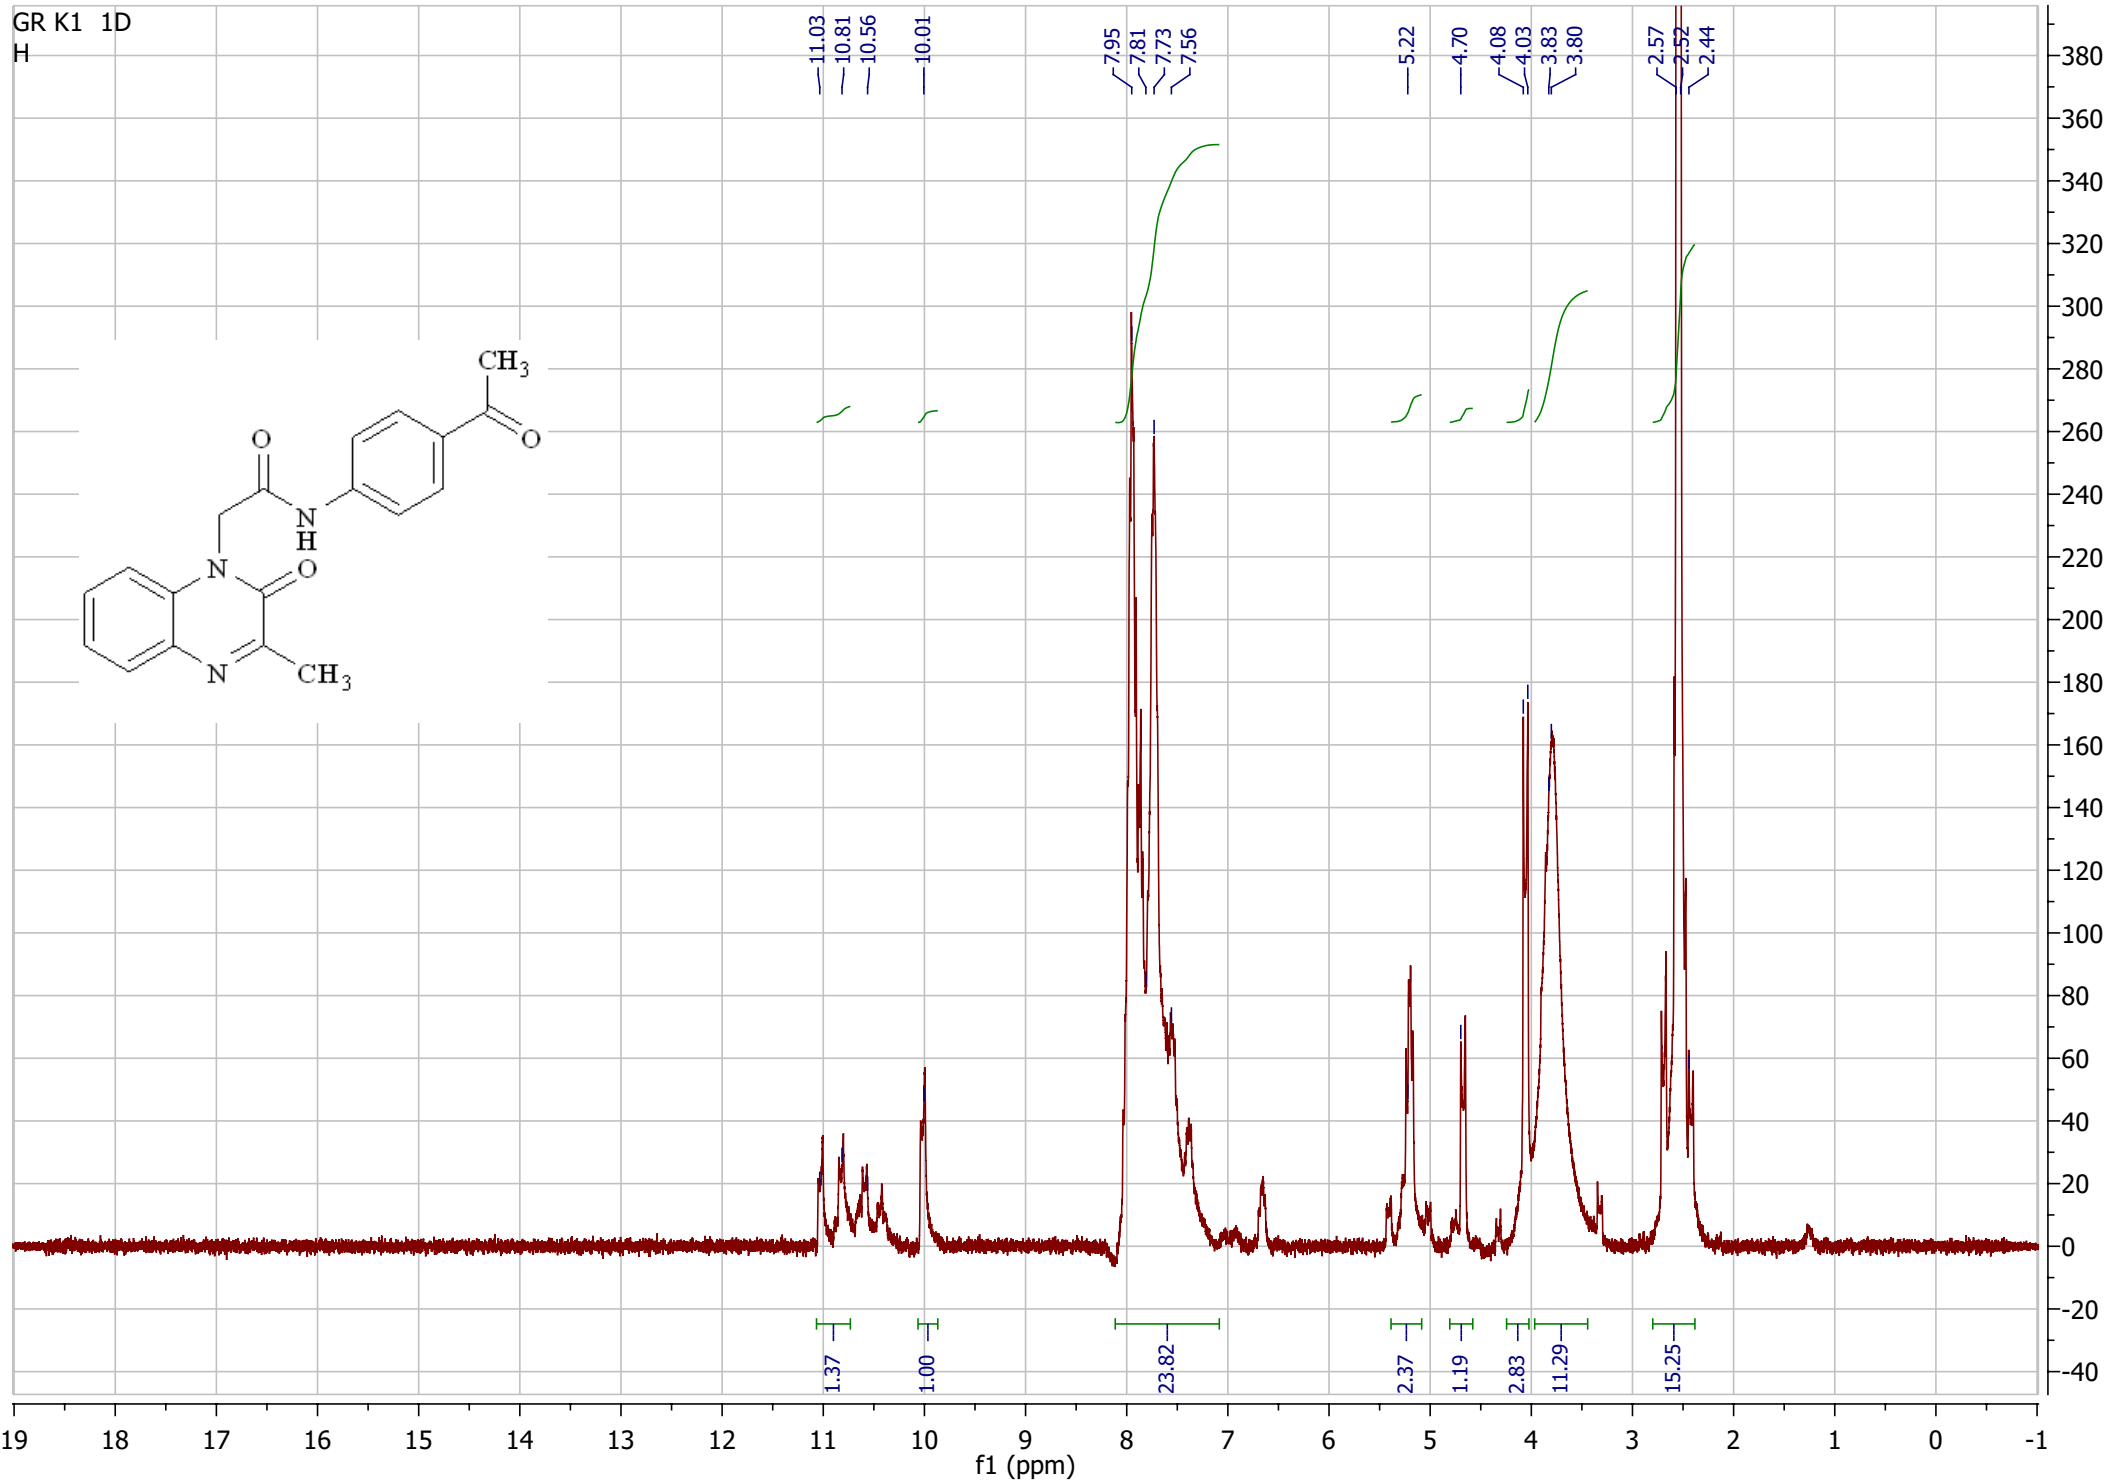

# $C^{13}$ NMR of compound (7)

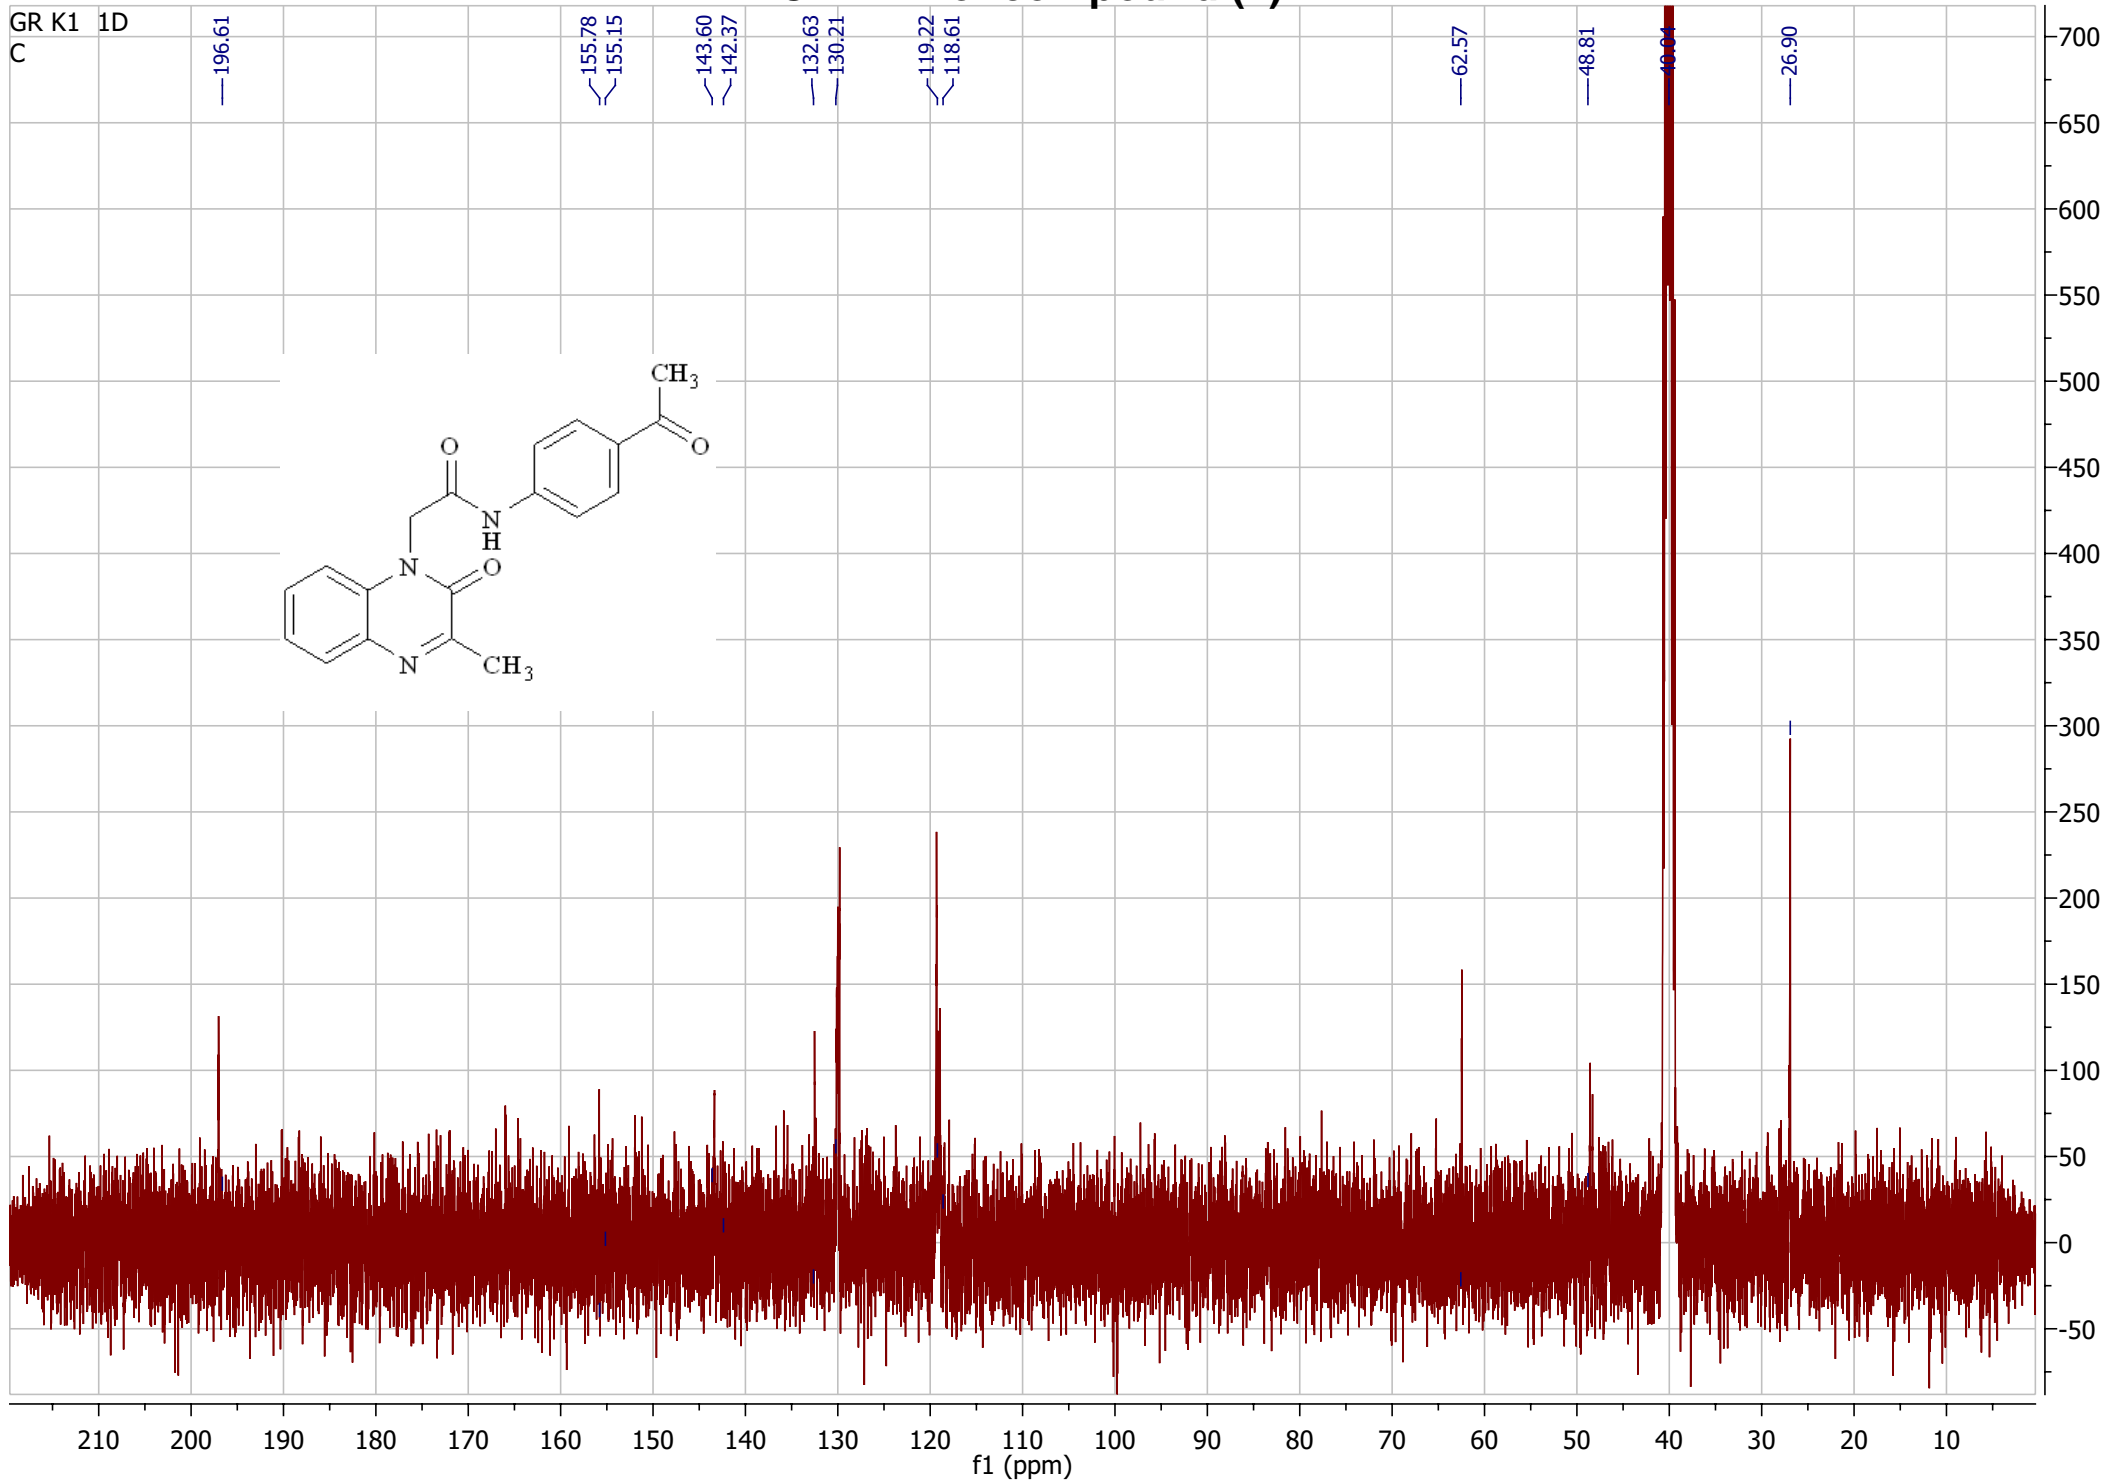

GR K1 1D  
DEPT135

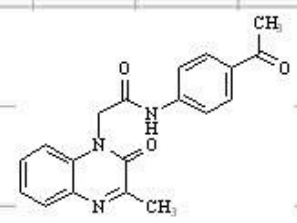

### Dept135 NMR of compound(7)

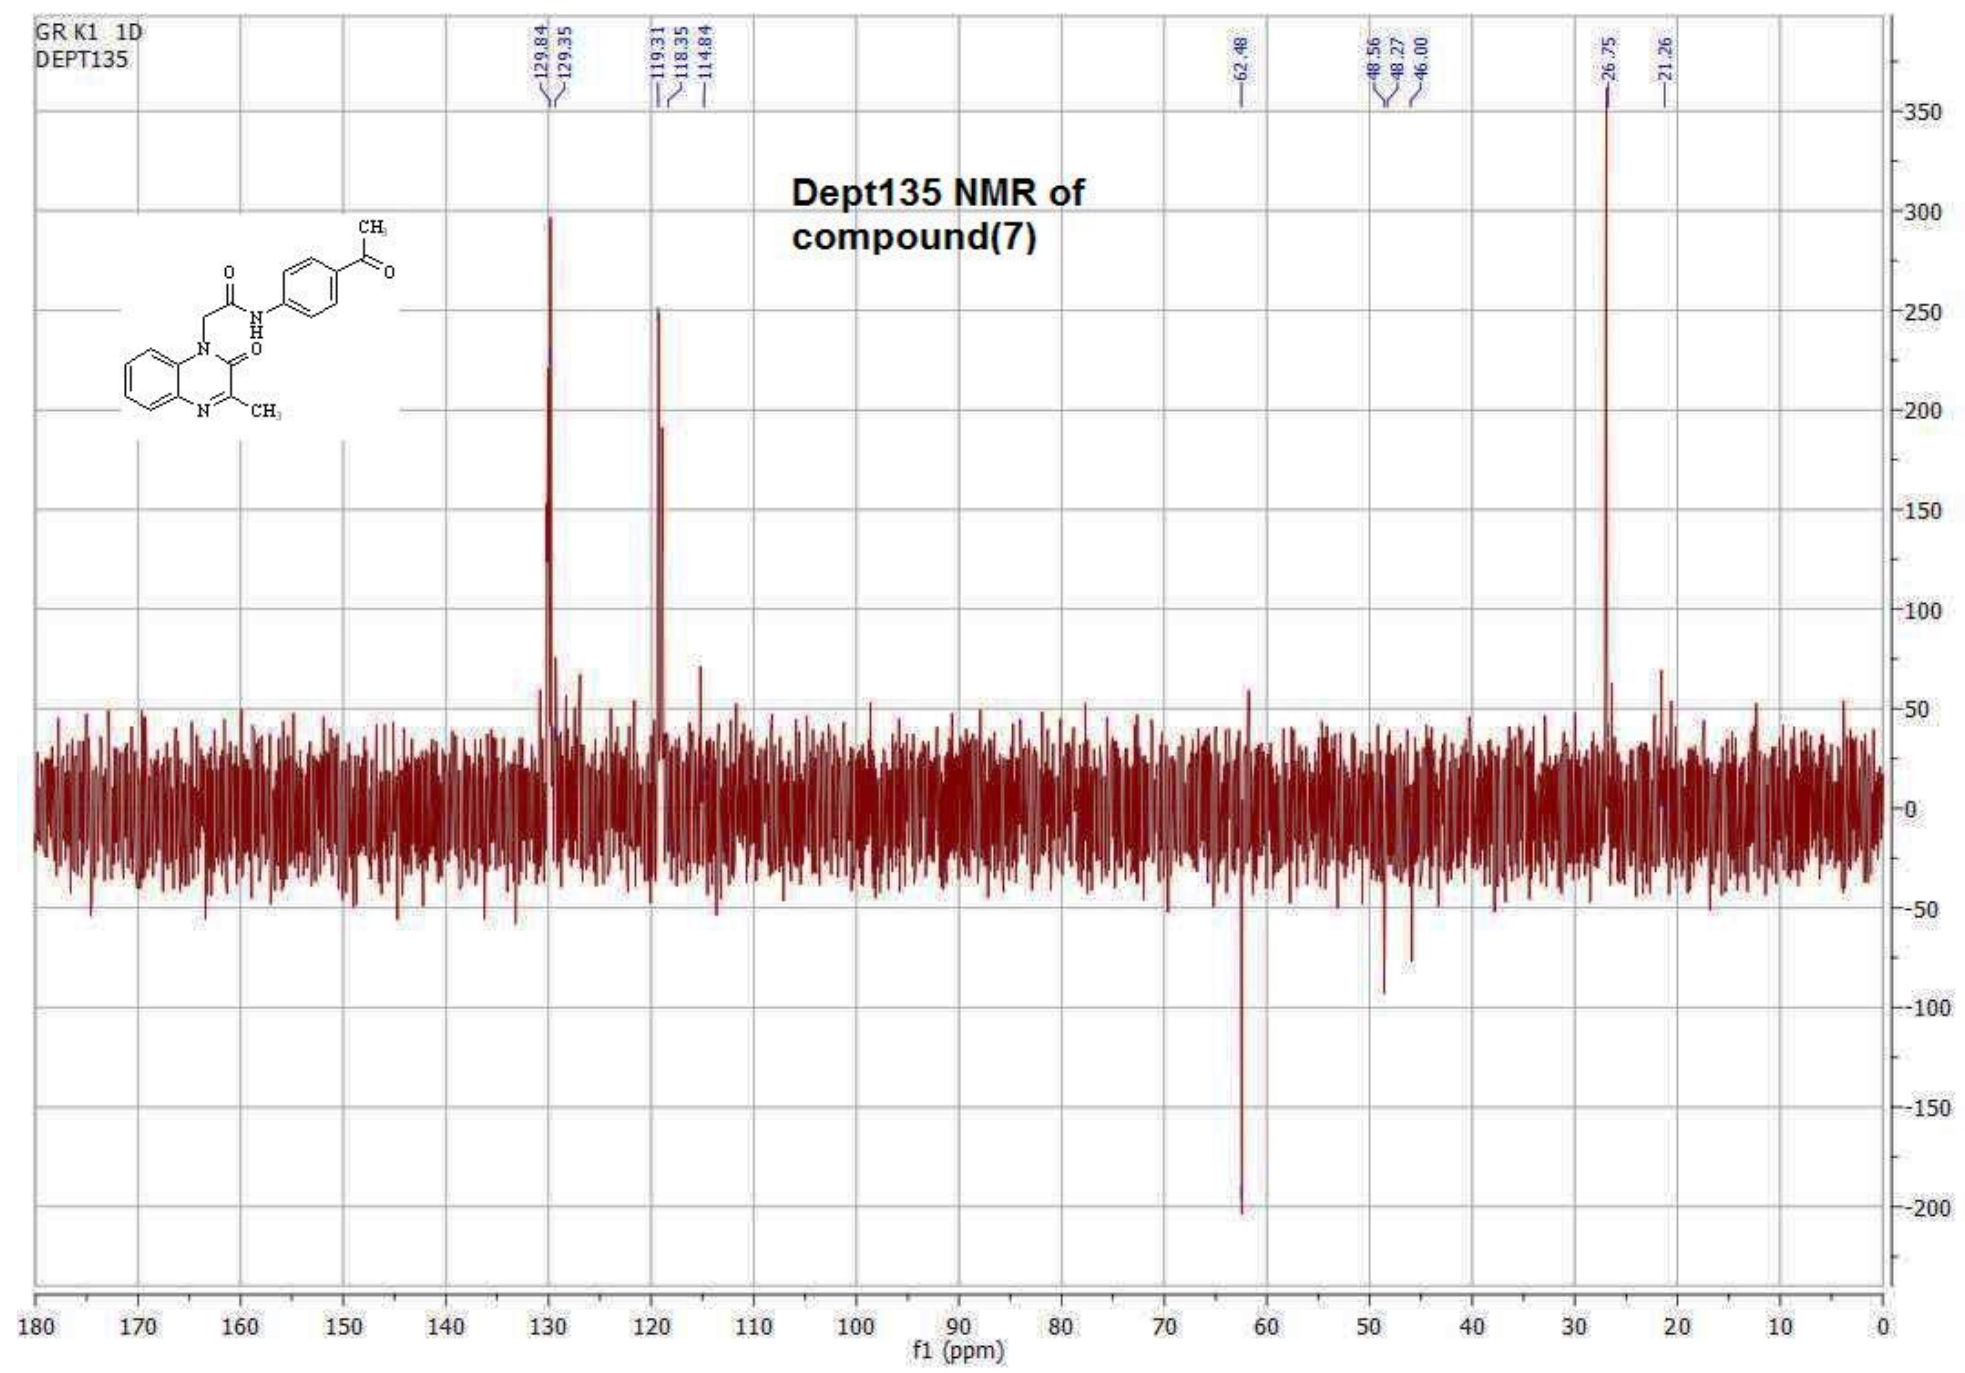

IR of compound 11a

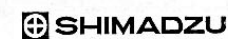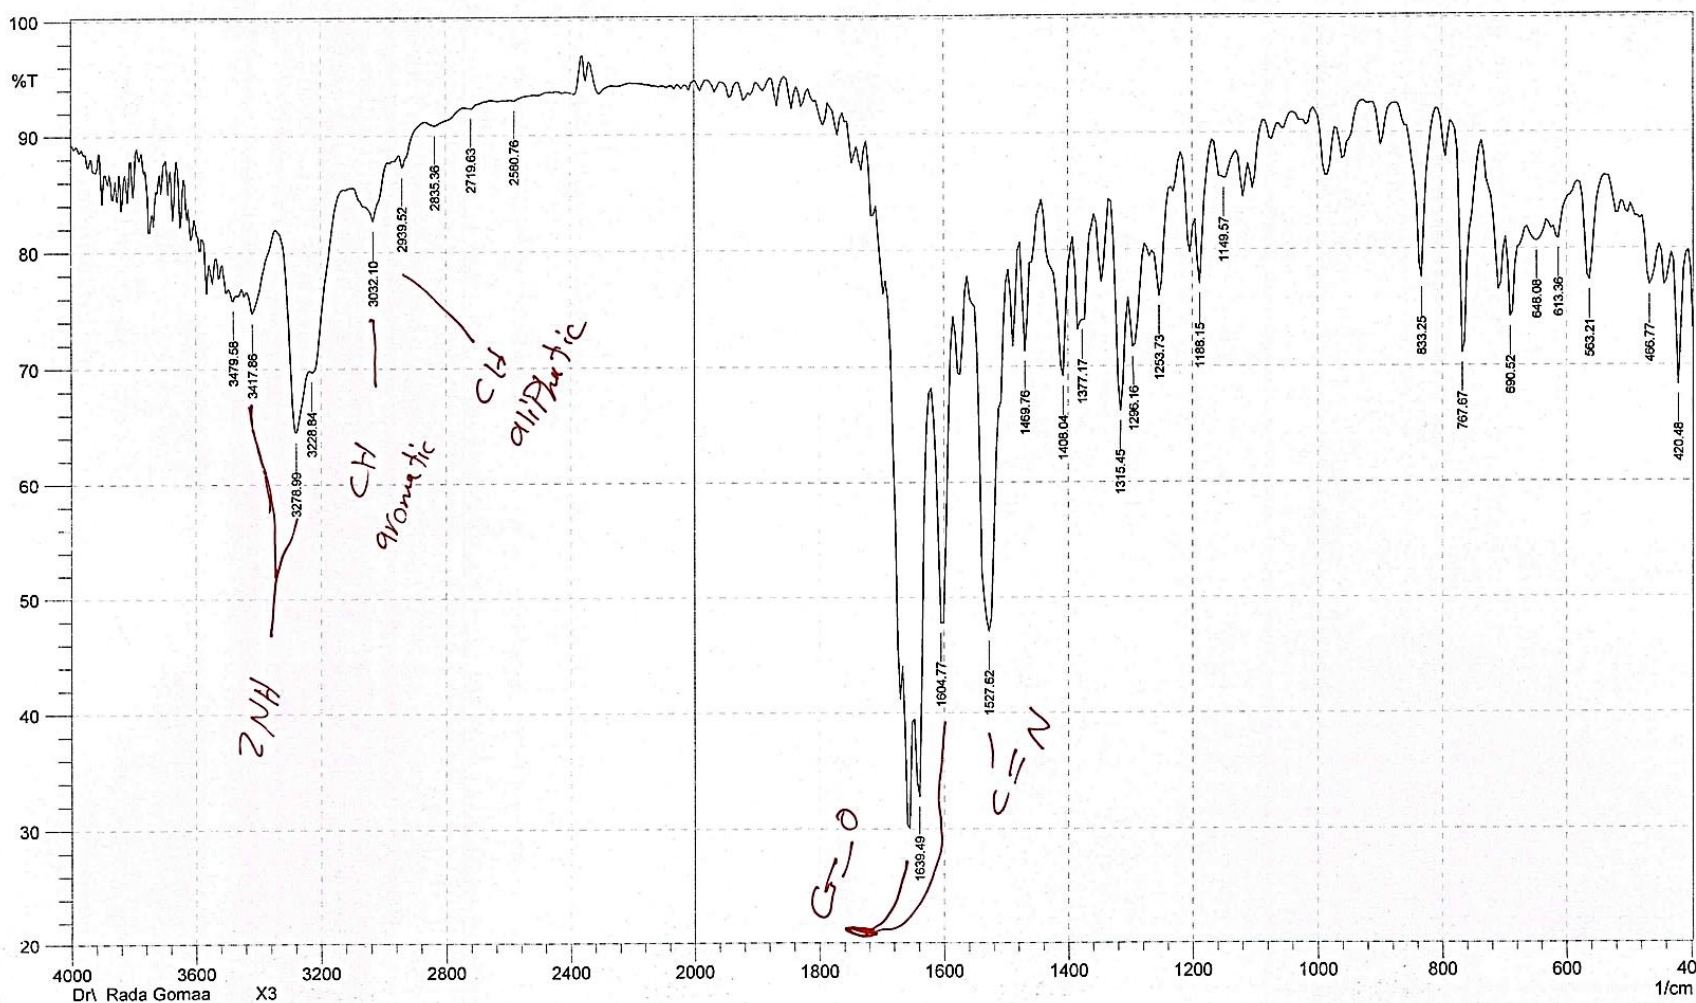

Comment;

Dr\ Rada Gomaa X3

No. of Scans; 8

Resolution; 8 [1/cm]

Date/Time; 11/11/2018 11:16:13 AM

User; usama



# H<sup>1</sup>NMR of compound (11a)

GR X3 1D

H

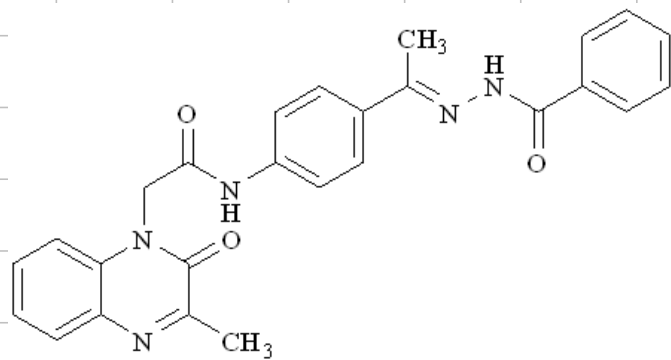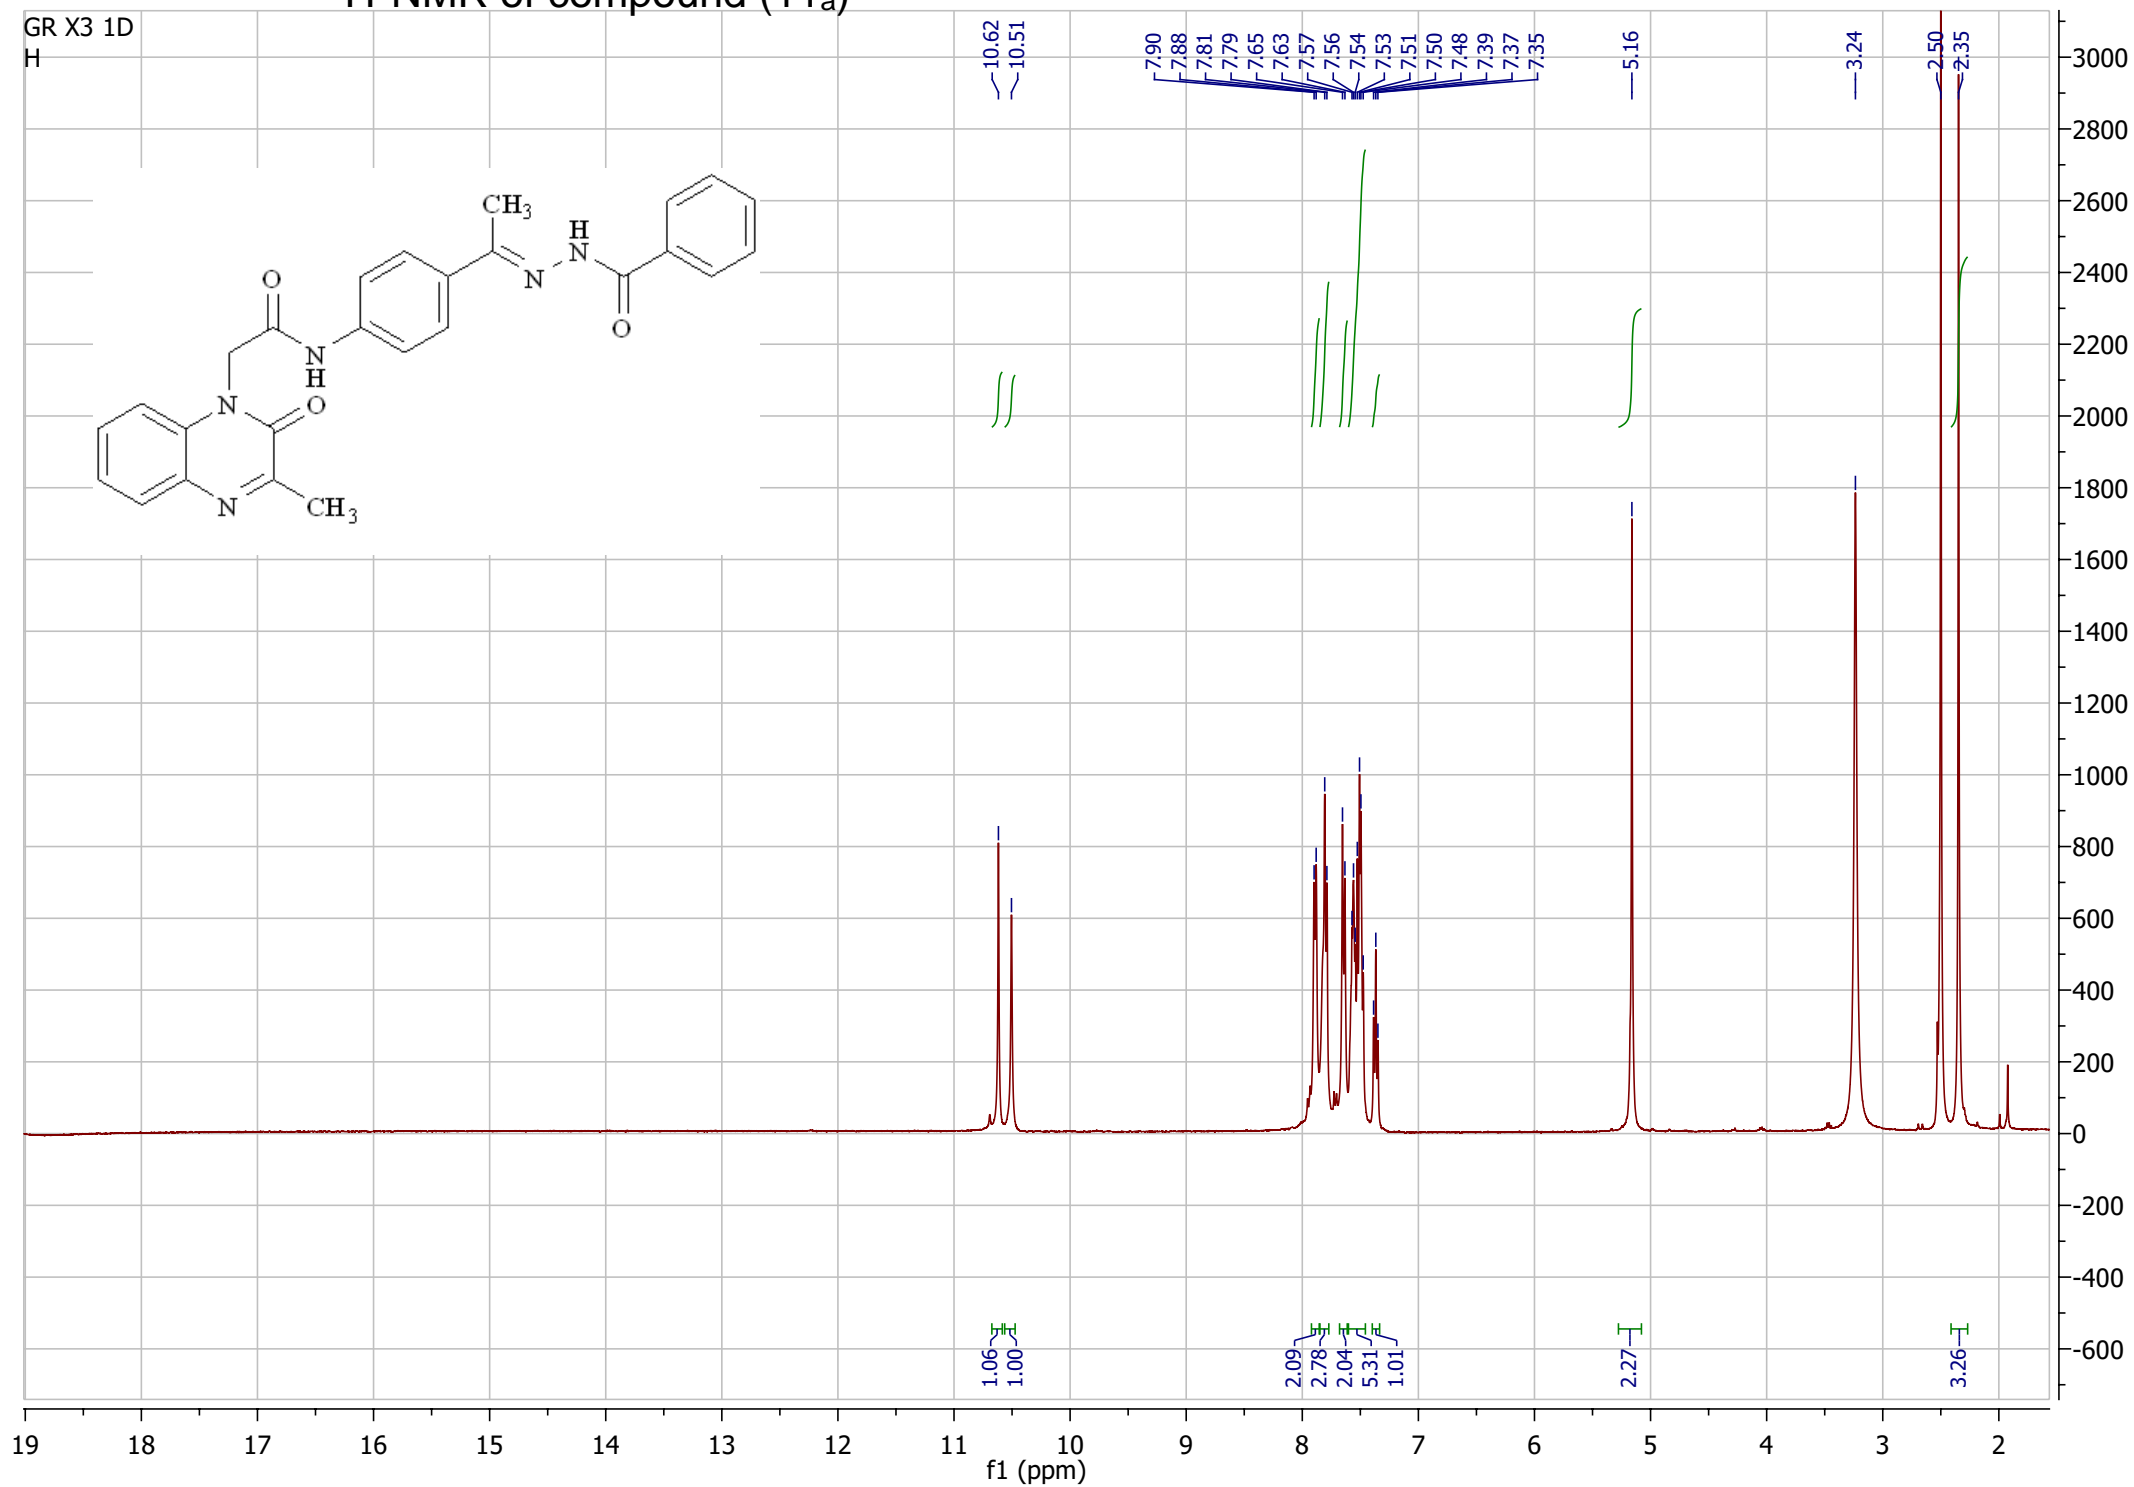

<sup>13</sup>C NMR 11a

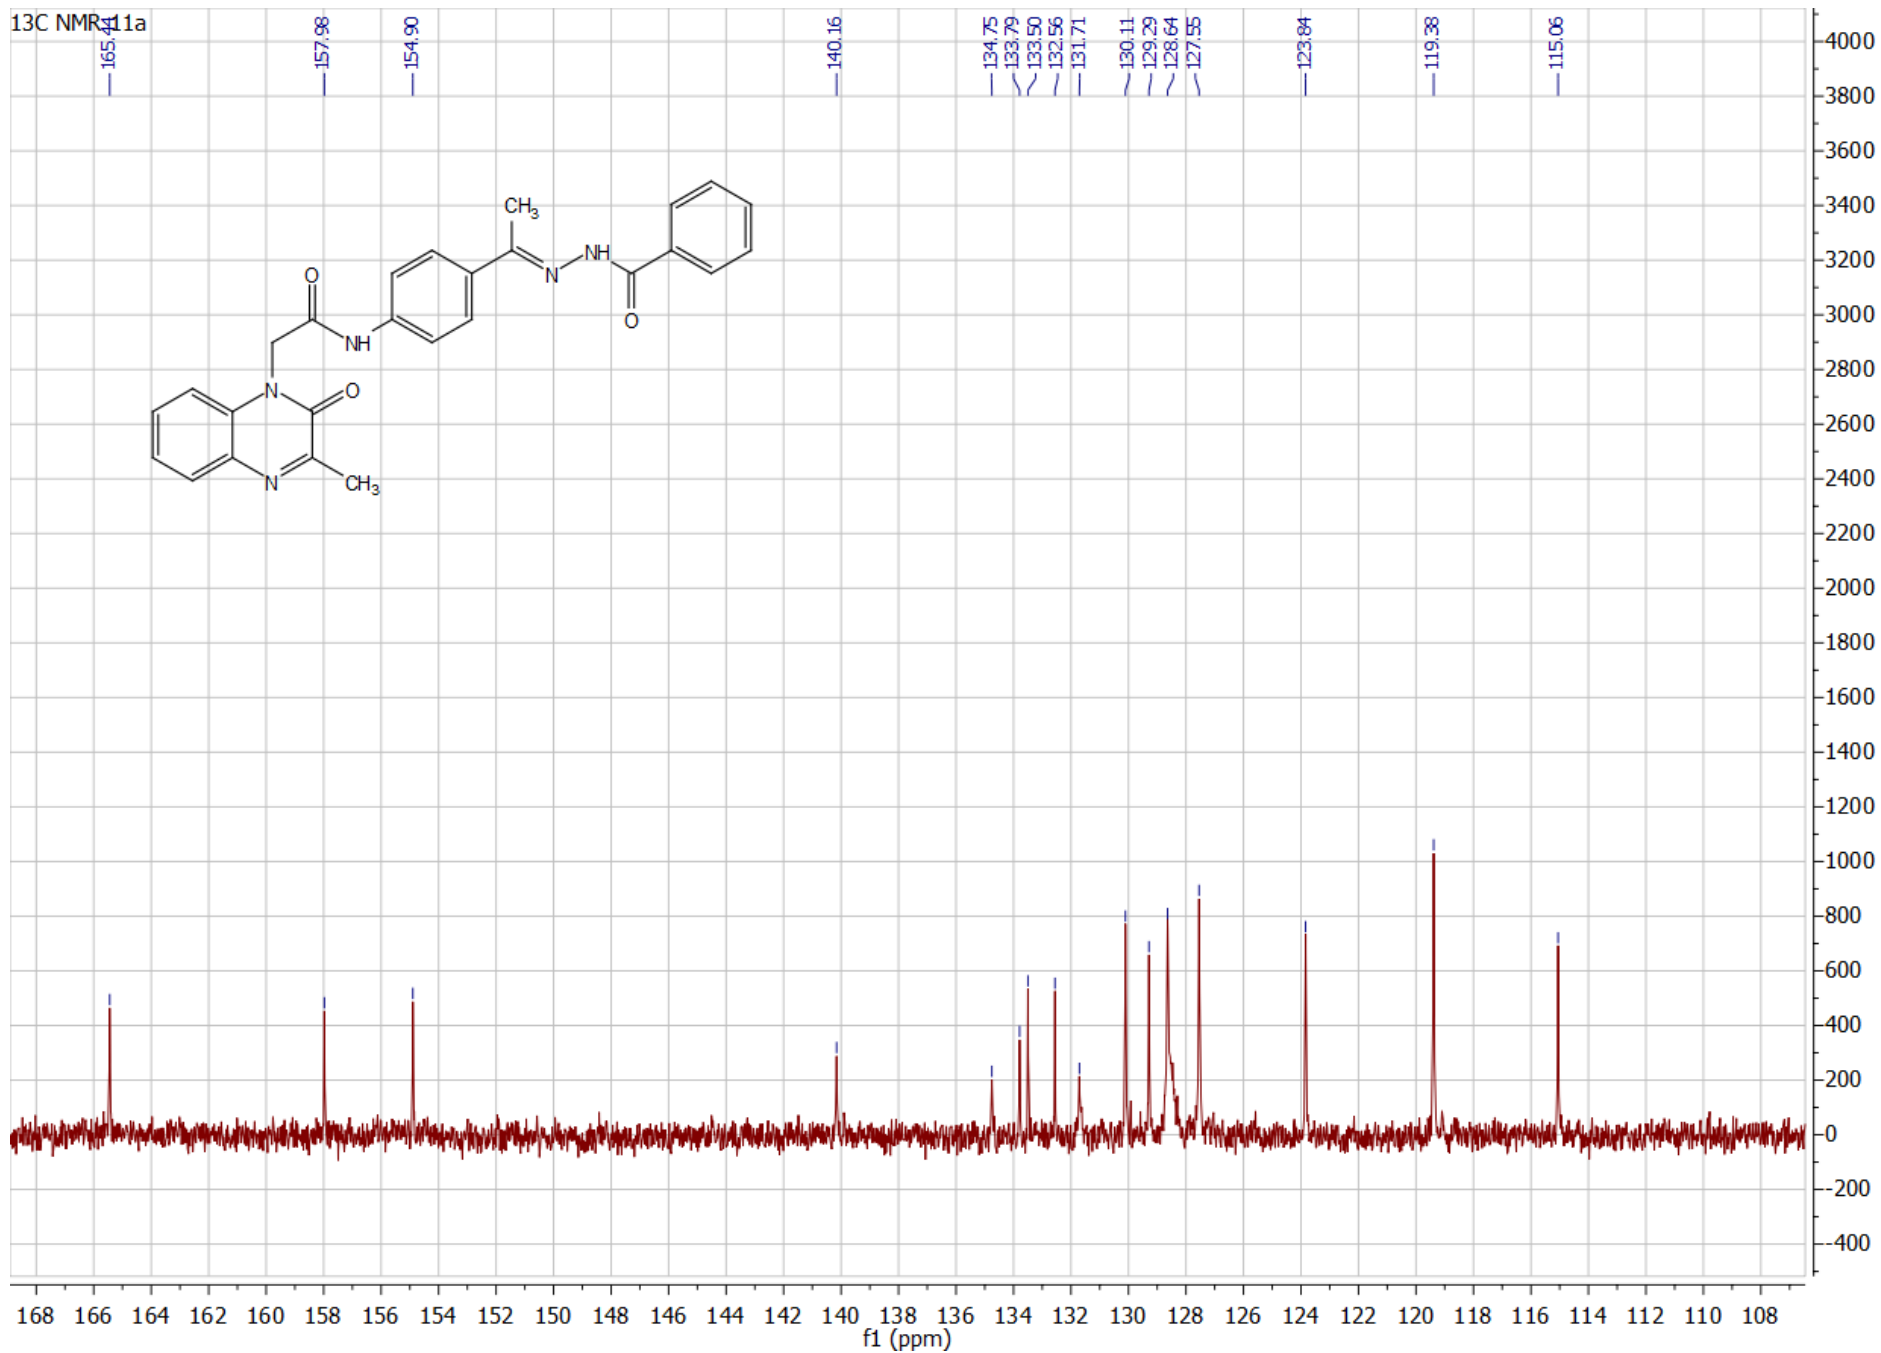

<sup>13</sup>C NMR 11a

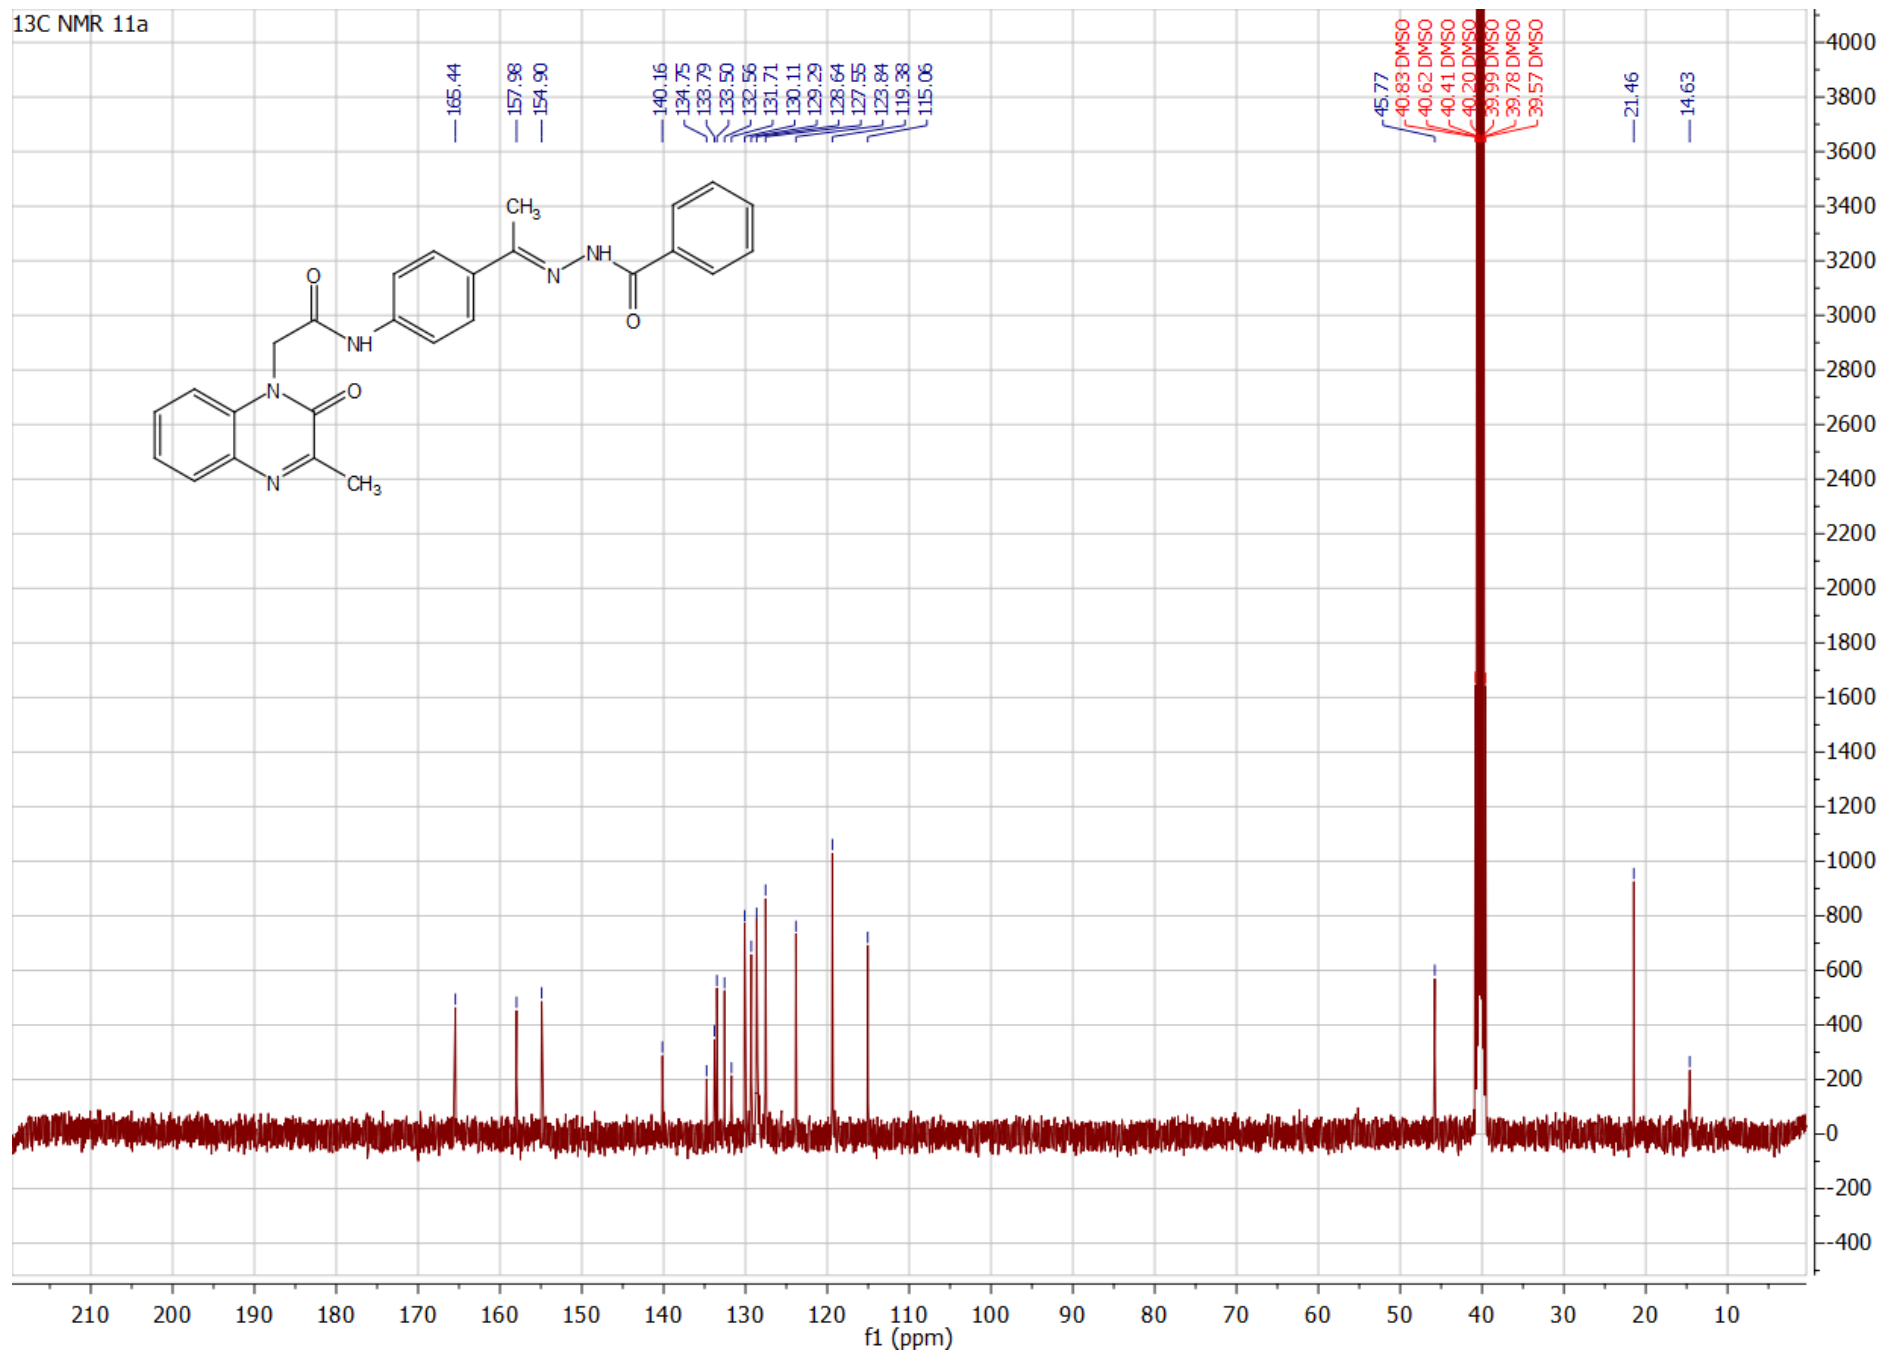

DEPT NMR 11a

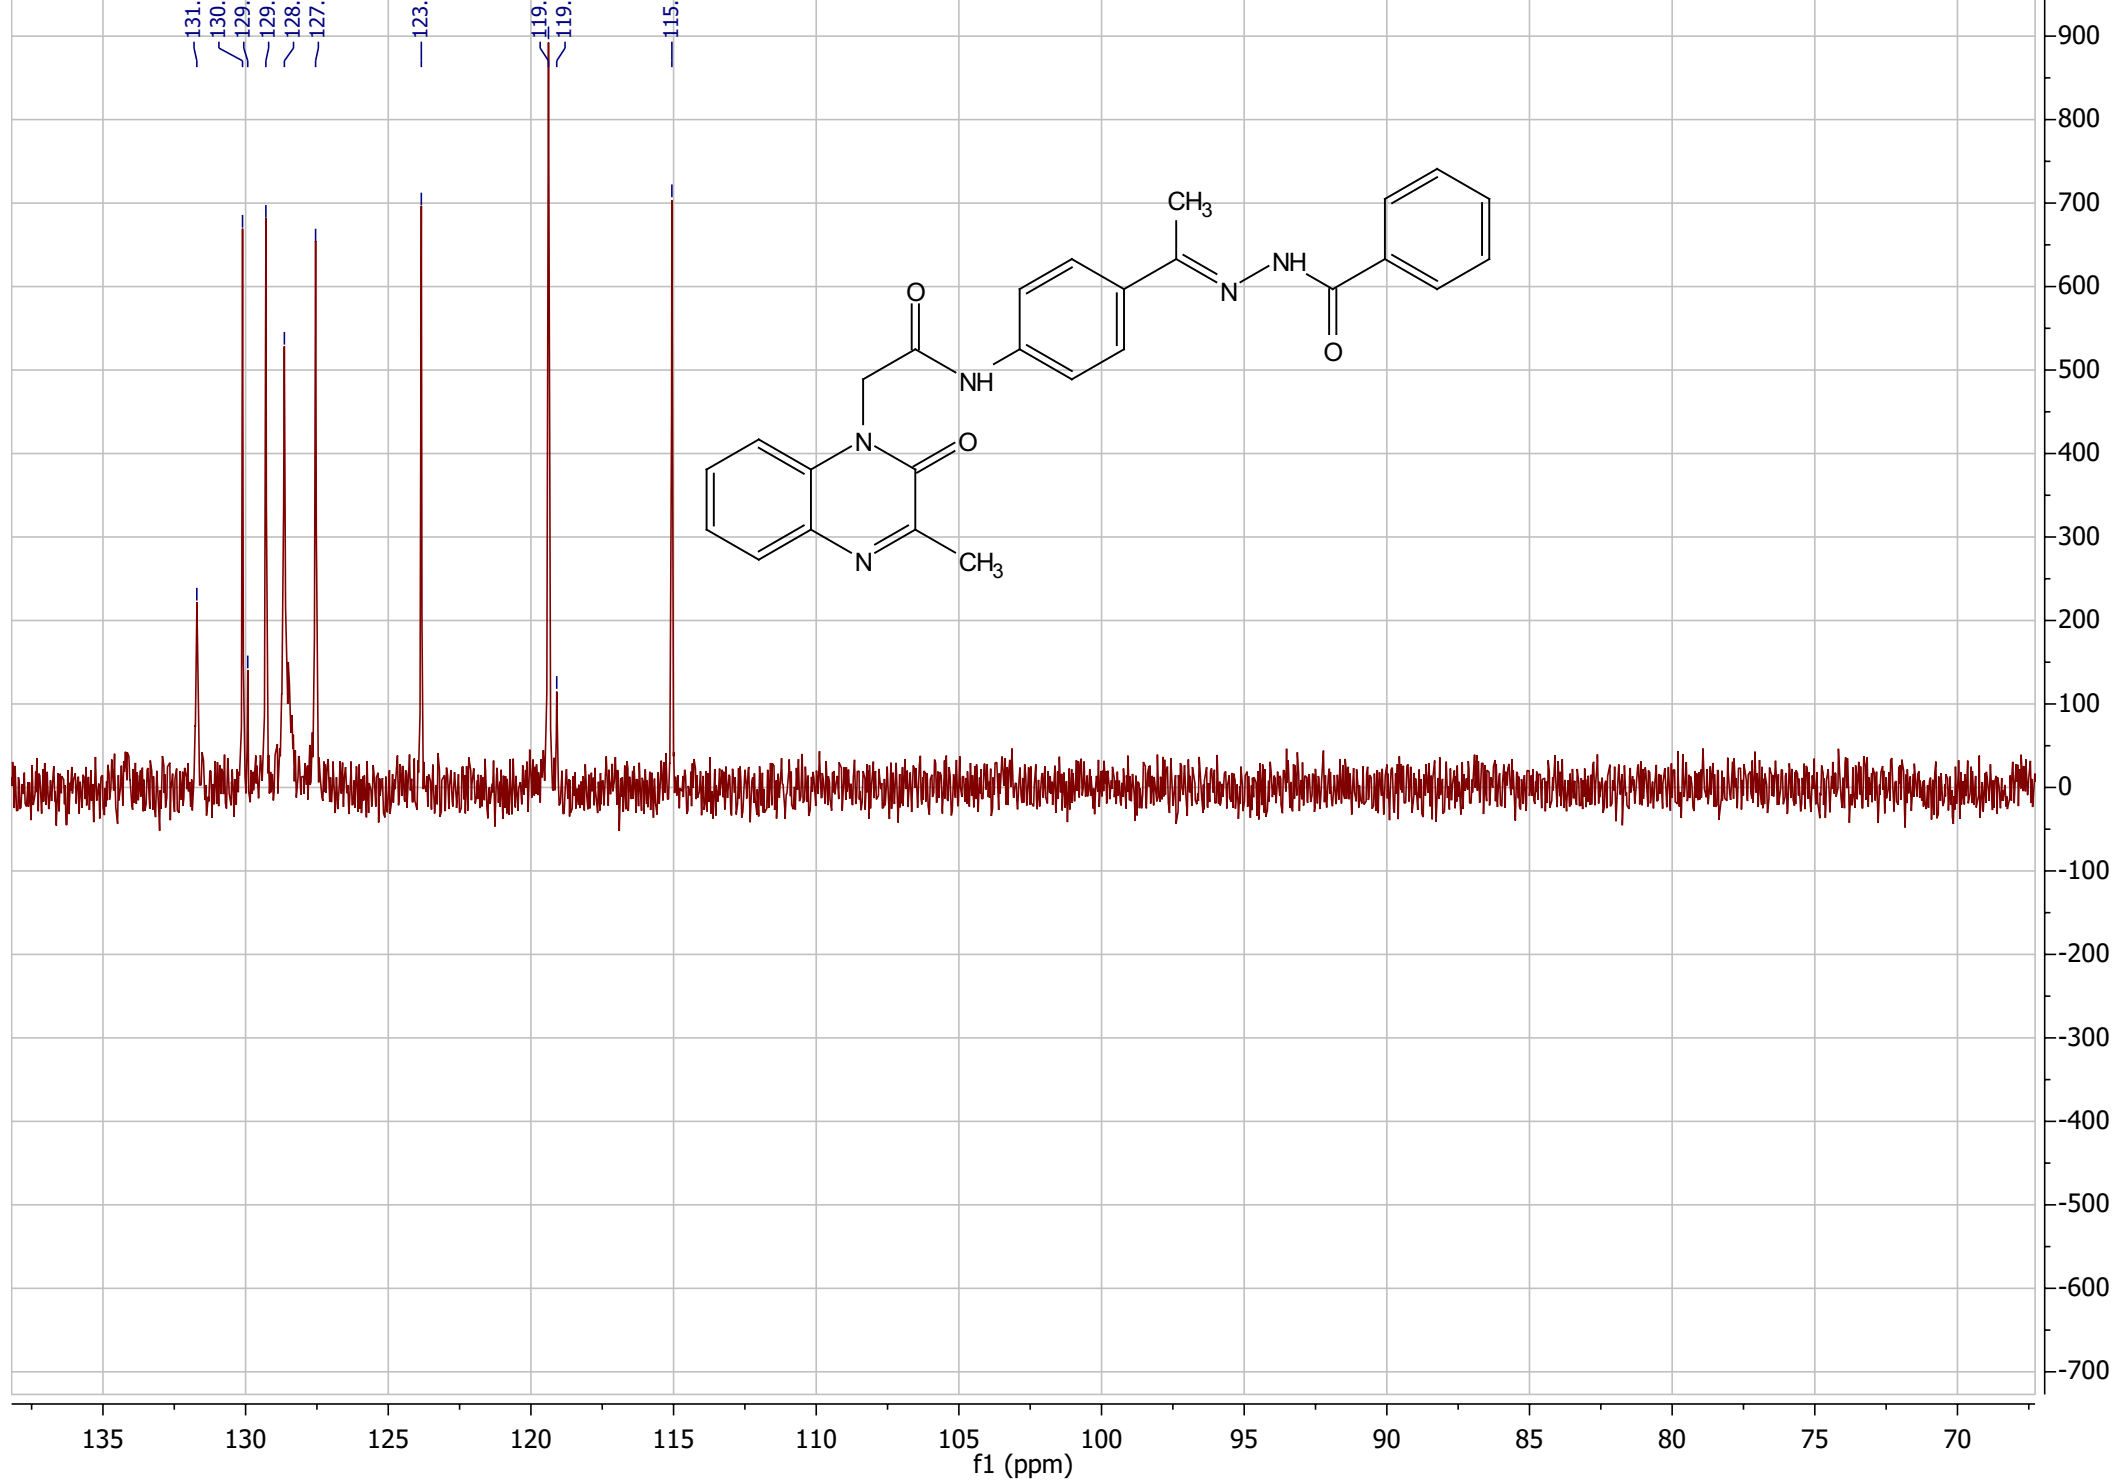

IR of compound 11b

SHIMADZU

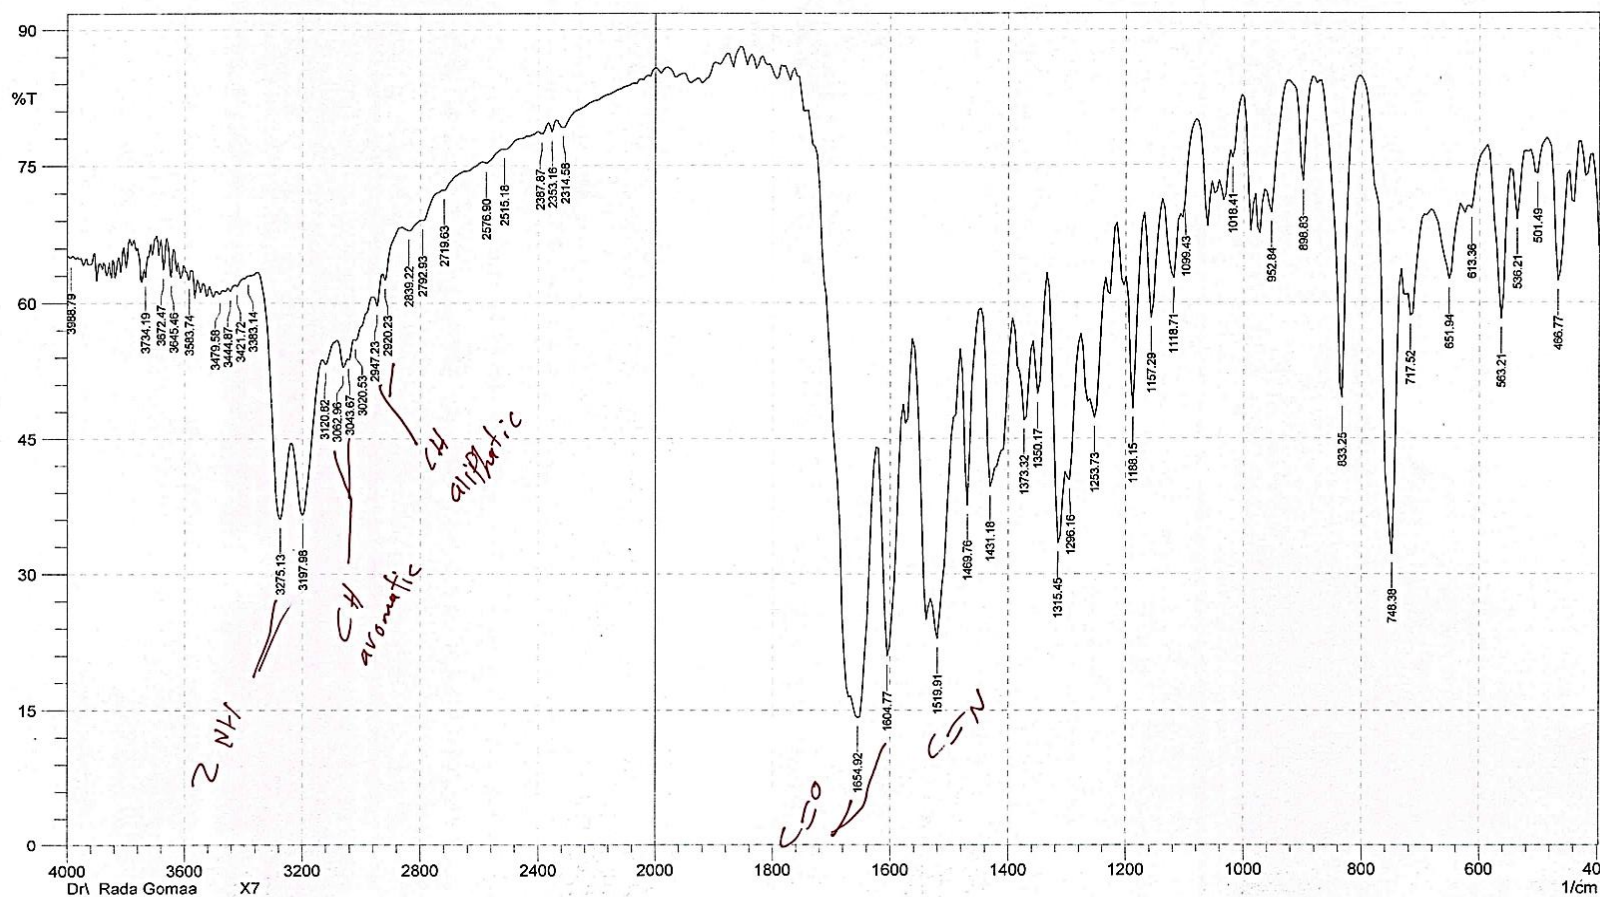

Comment;

Dr/ Rada Gornaa X7

No. of Scans; 8

Resolution; 8 [1/cm]

Date/Time; 11/11/2018 11:00:36 AM

User; usama

GR X7 1D  
H

# HNMR of compound (11b)

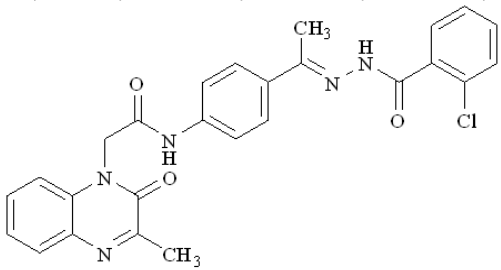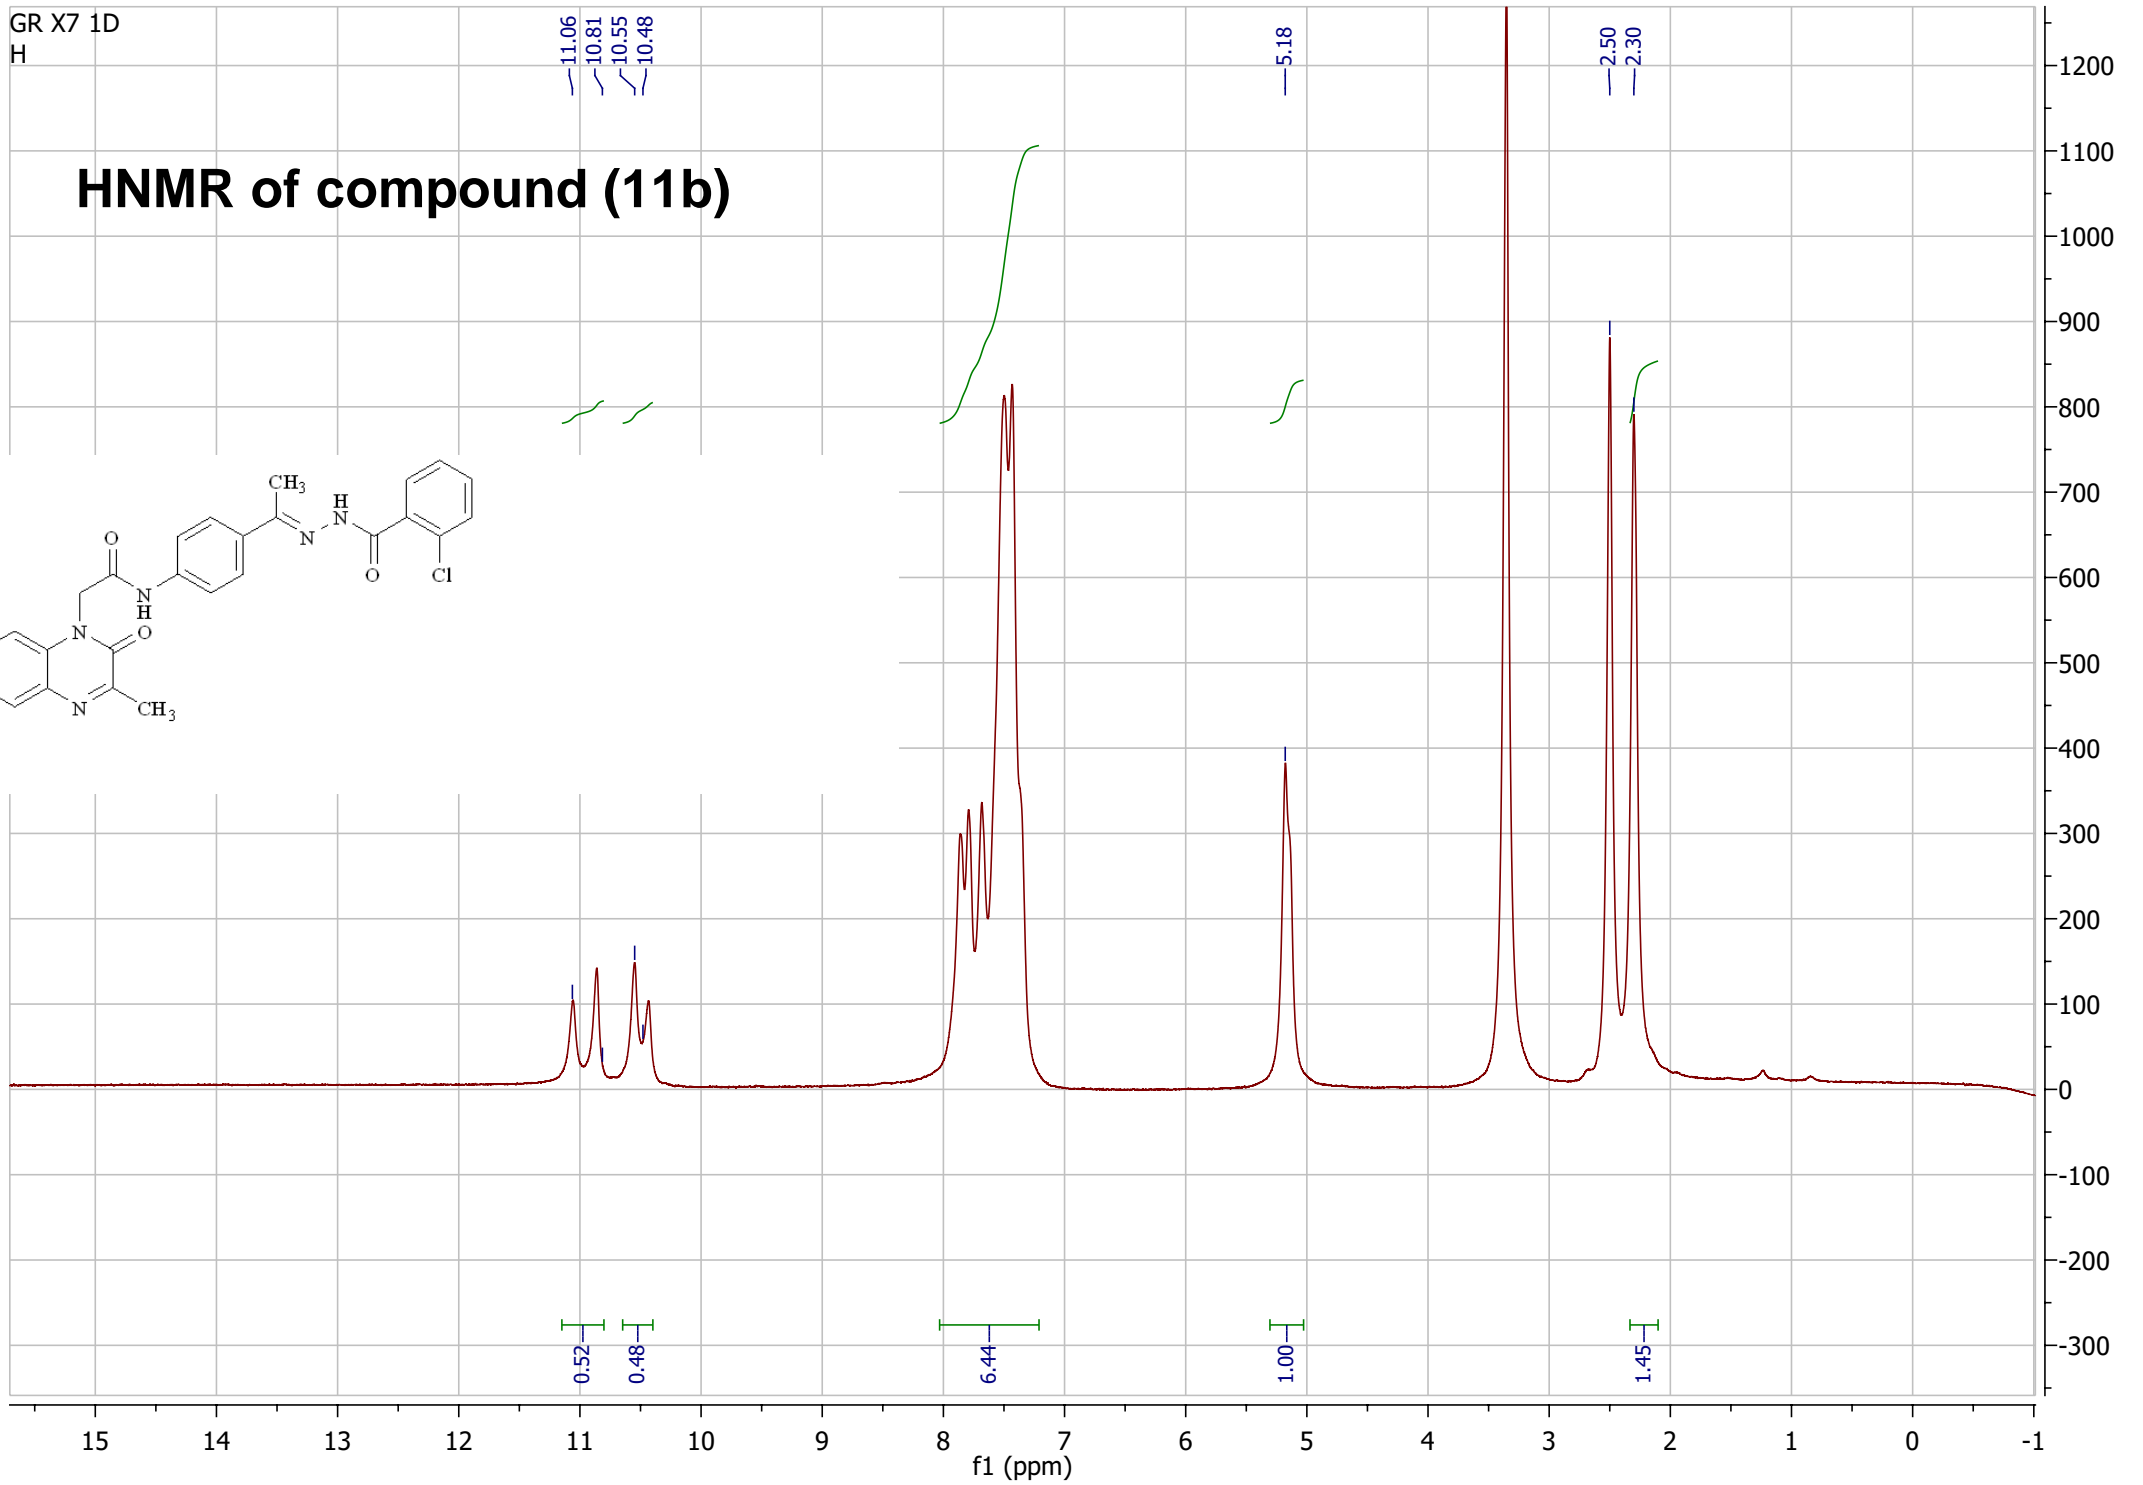

<sup>13</sup>C NMR 11b

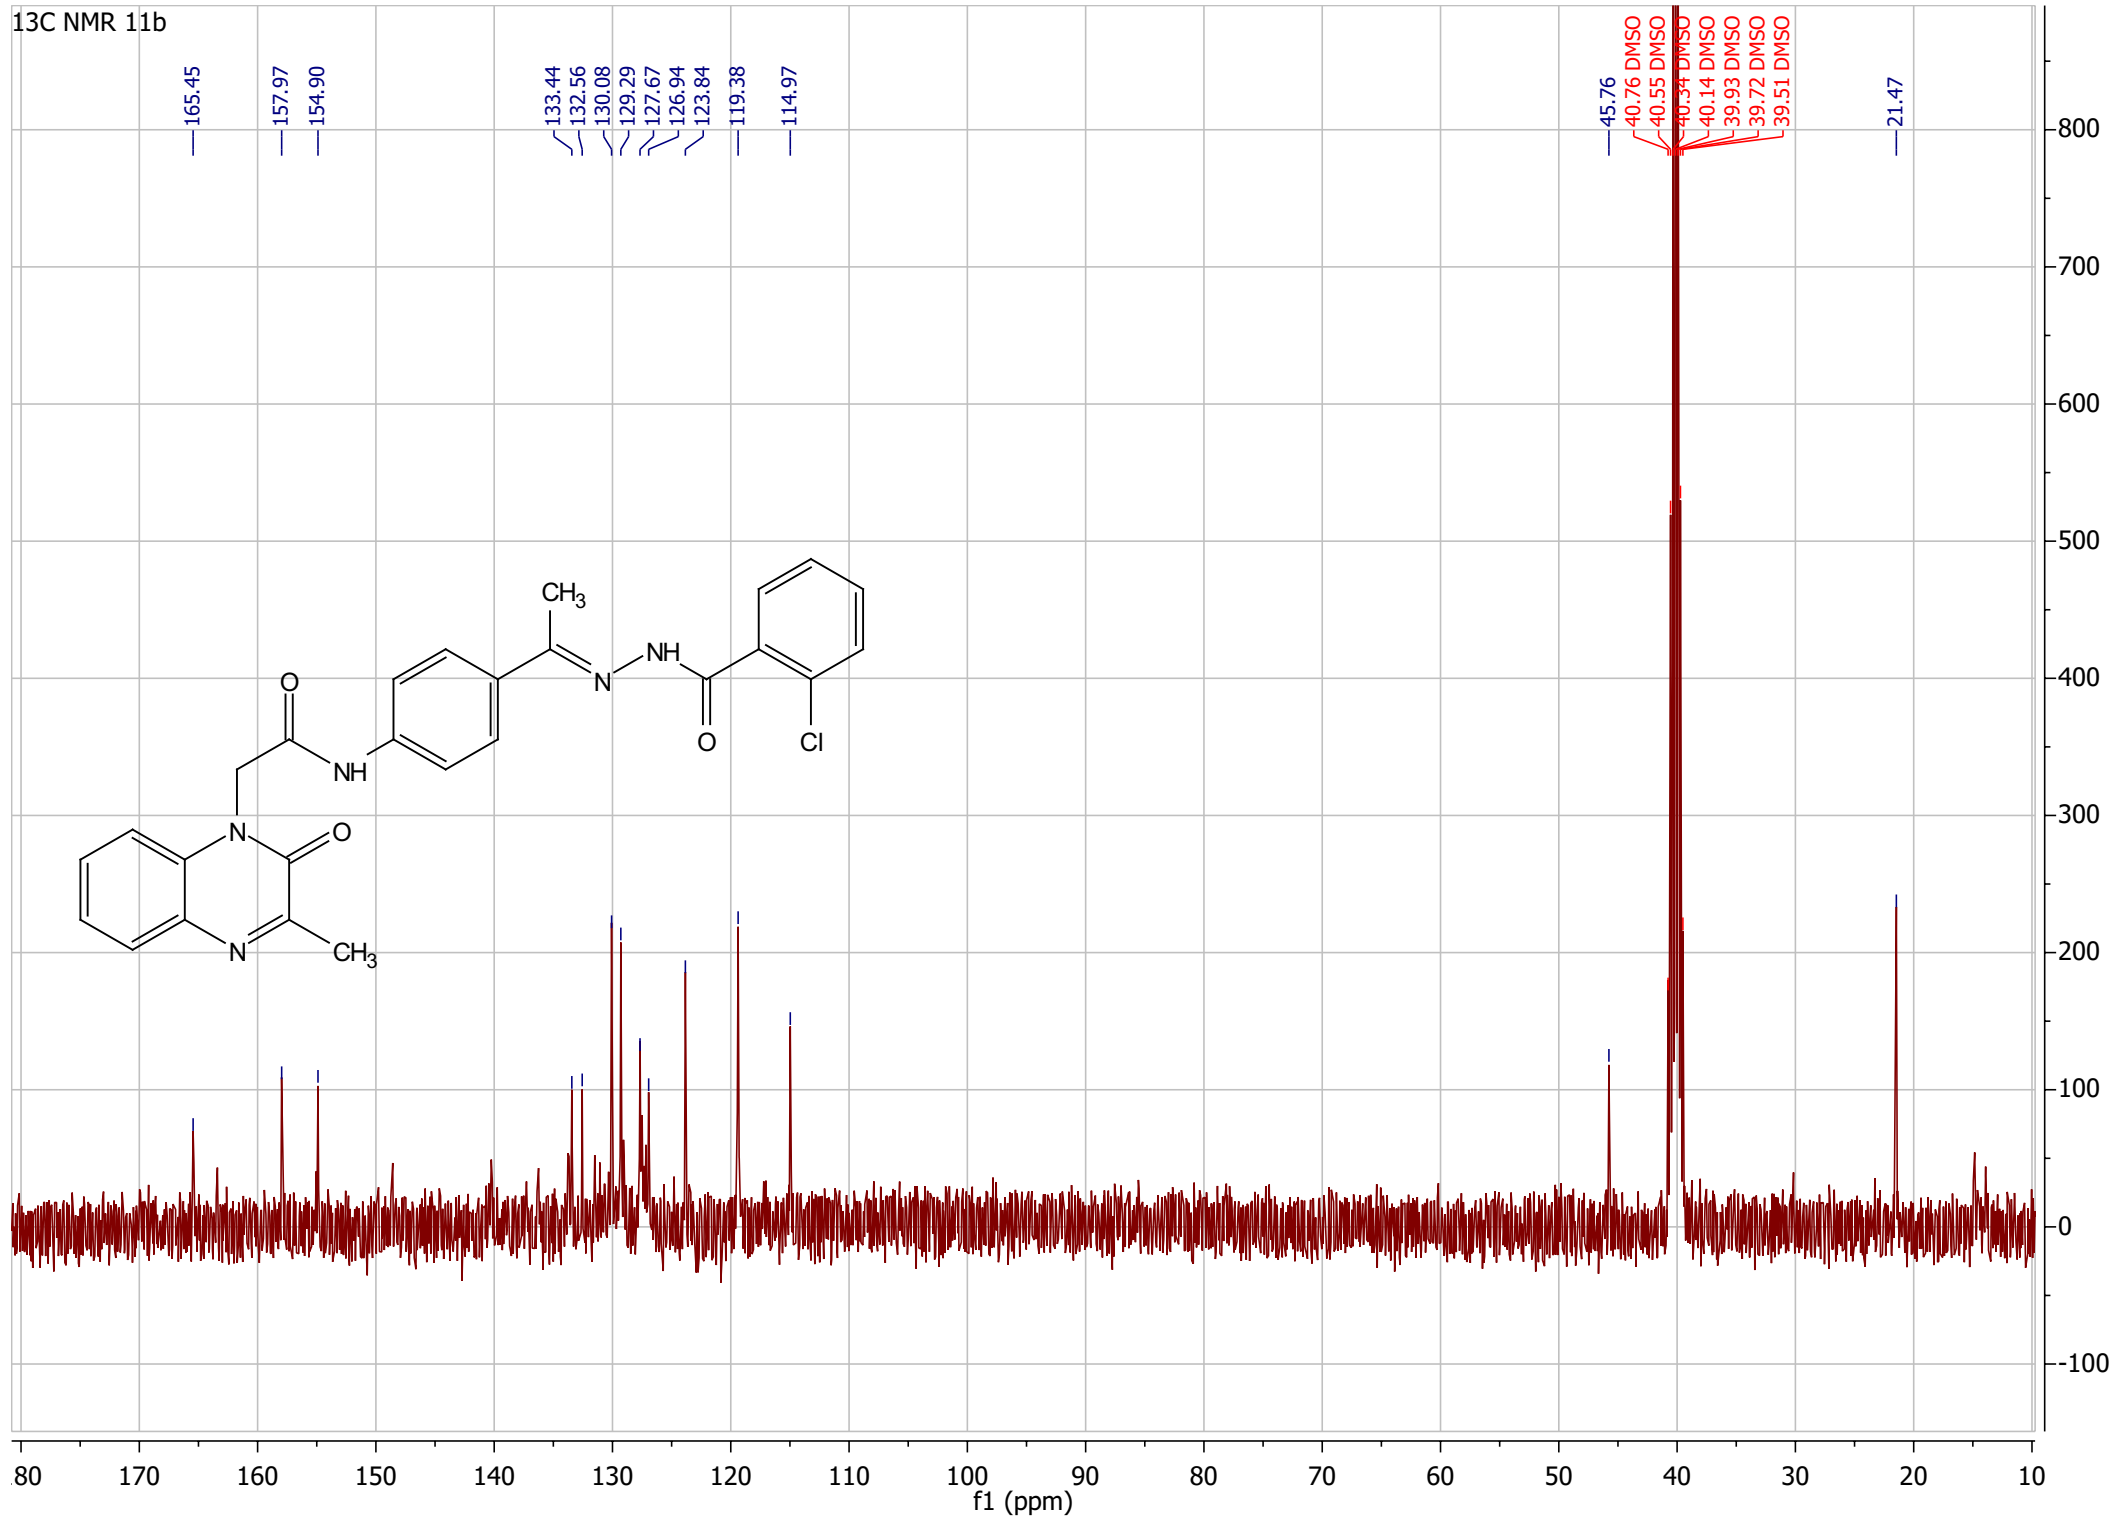

# Dept 135 NMR of compound (11b)

GR X7 1D  
DEPT135

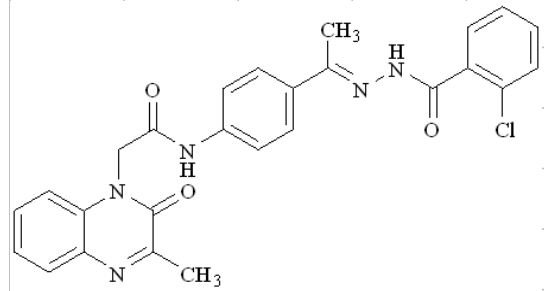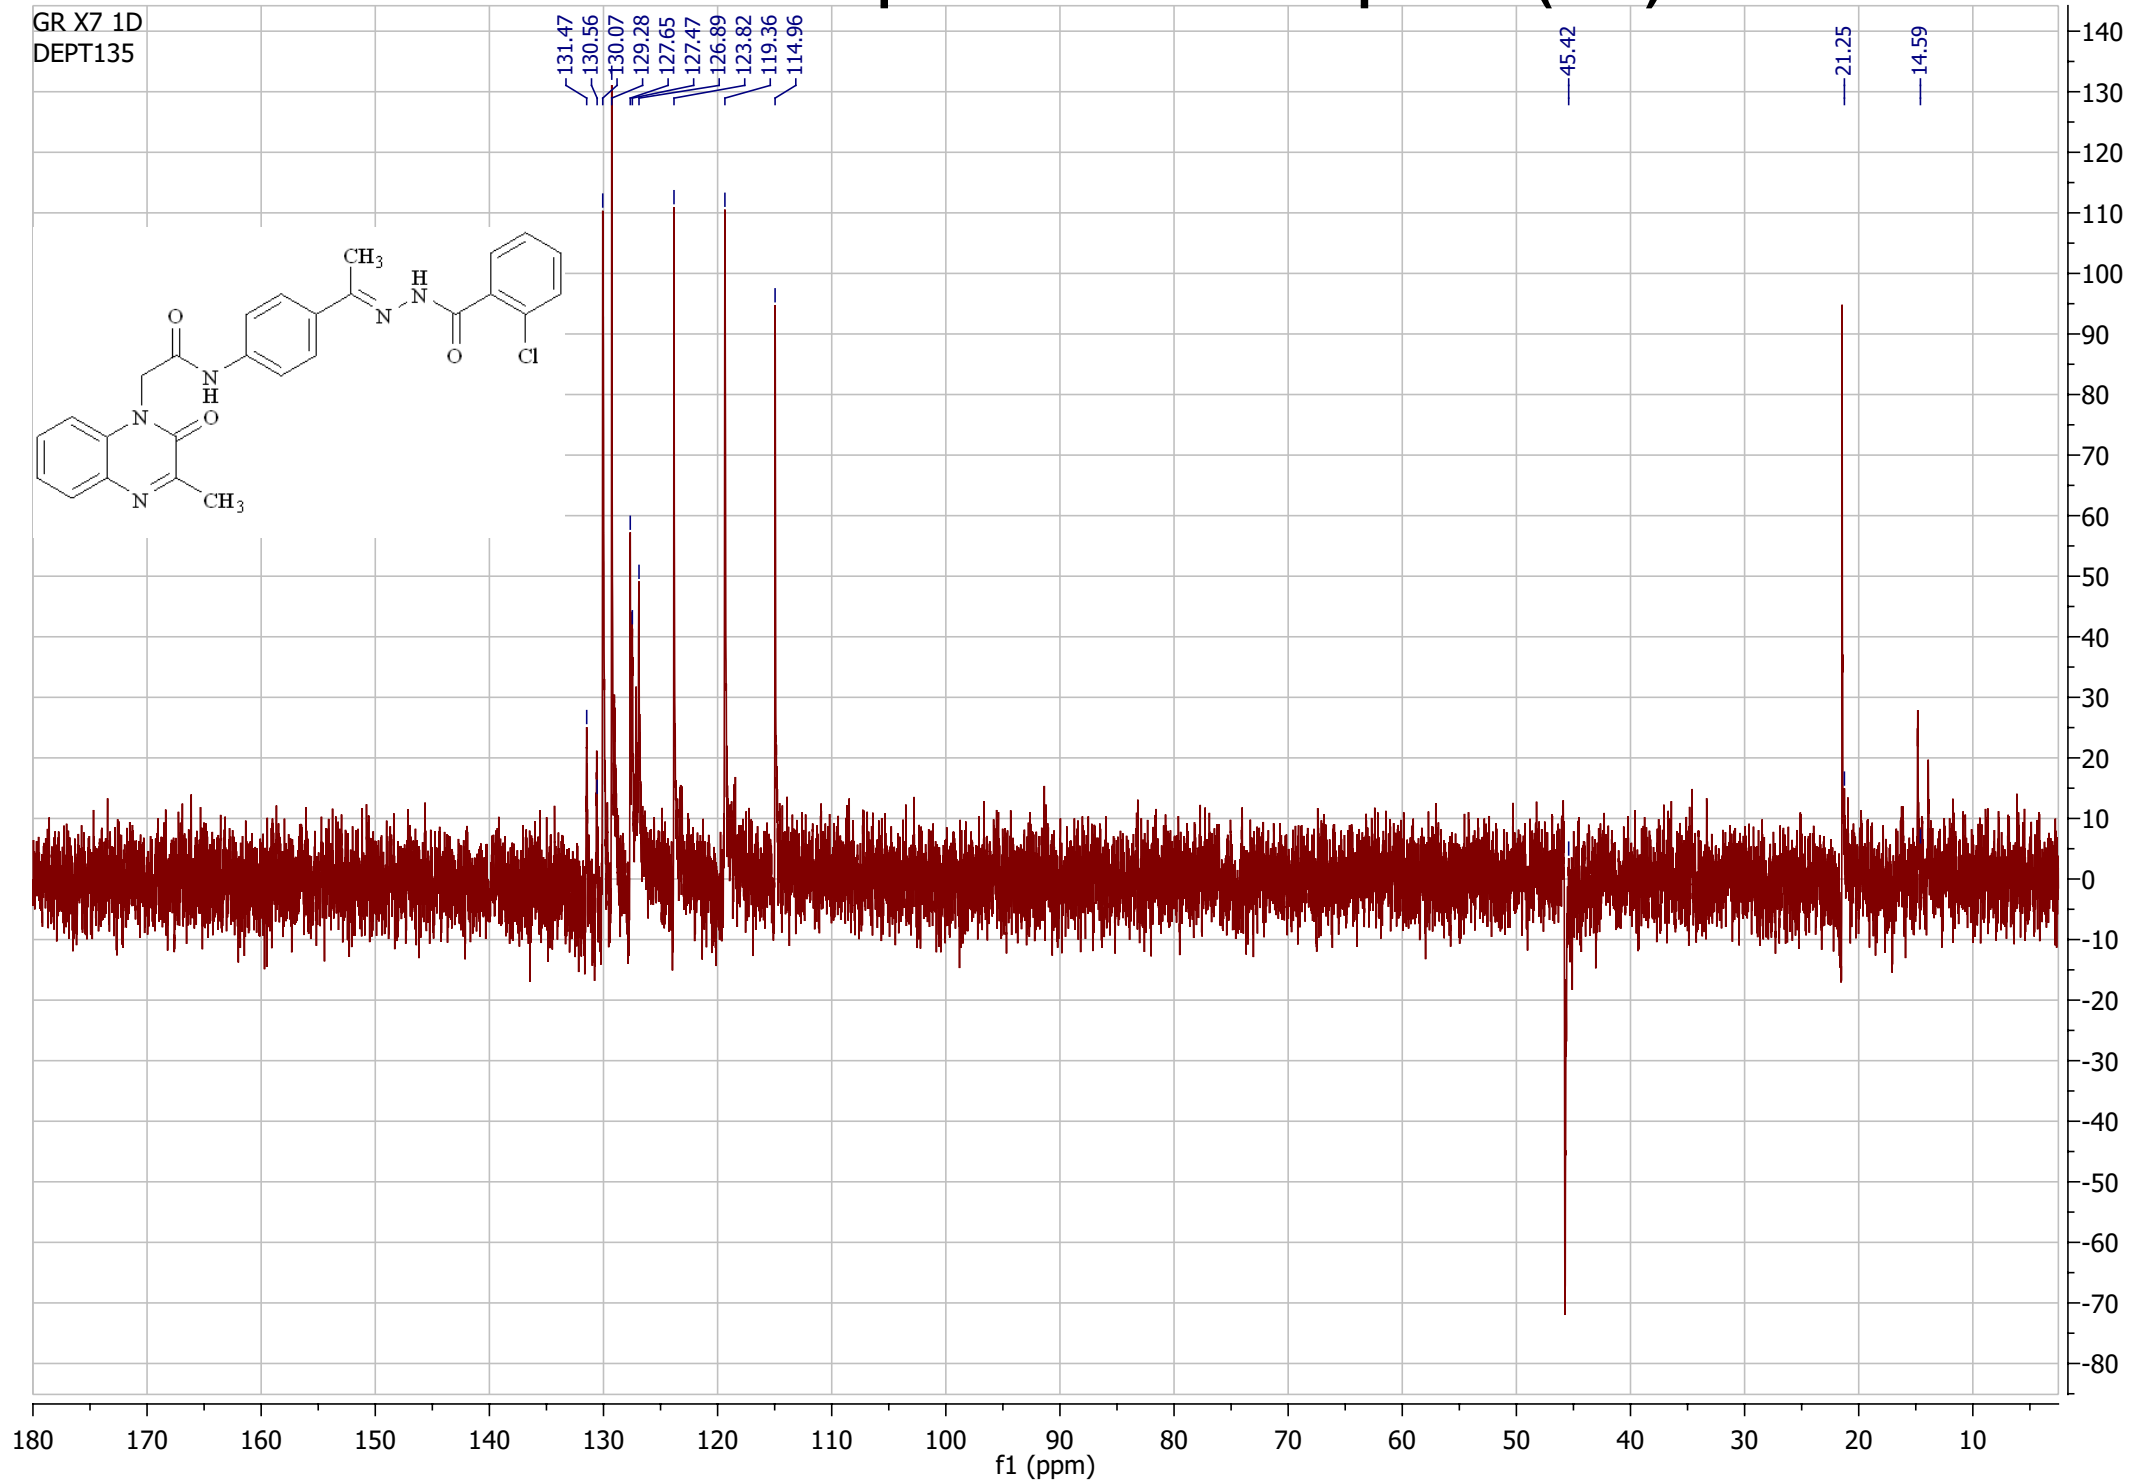



IR of compound 11c

SHIMADZU

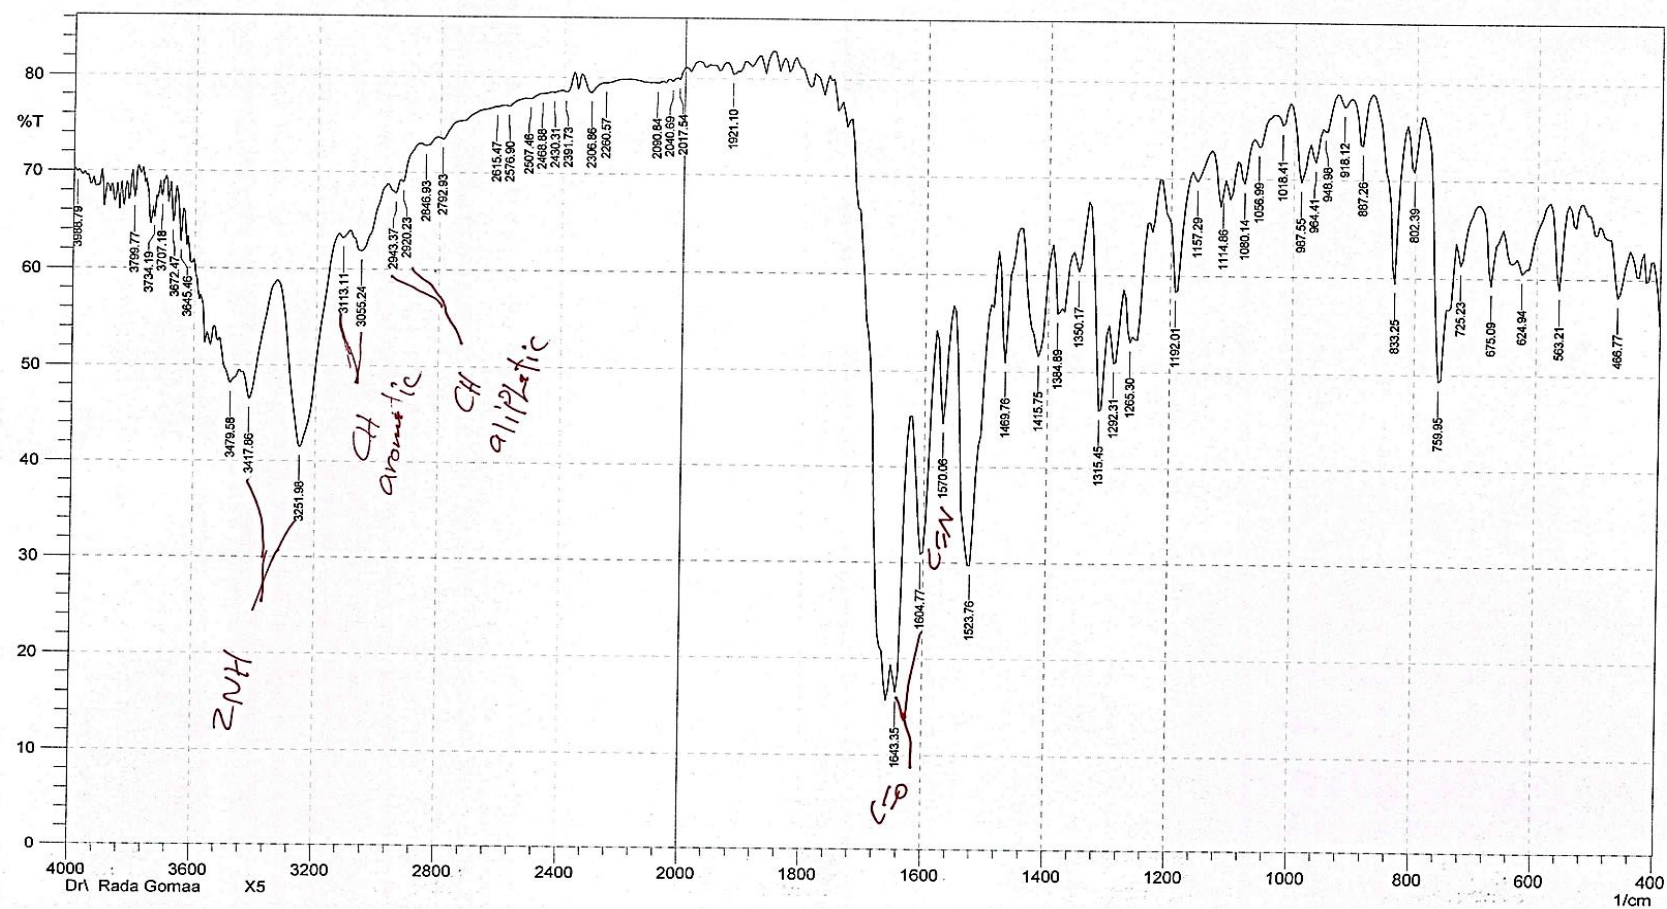

Comment;

Dr Rada Goma X5

No. of Scans; 8

Resolution; 8 [1/cm]

Date/Time; 11/11/2018 11:12:34 AM

User; usama

# $^1\text{H}$ NMR of compound (11c)

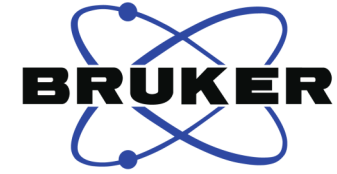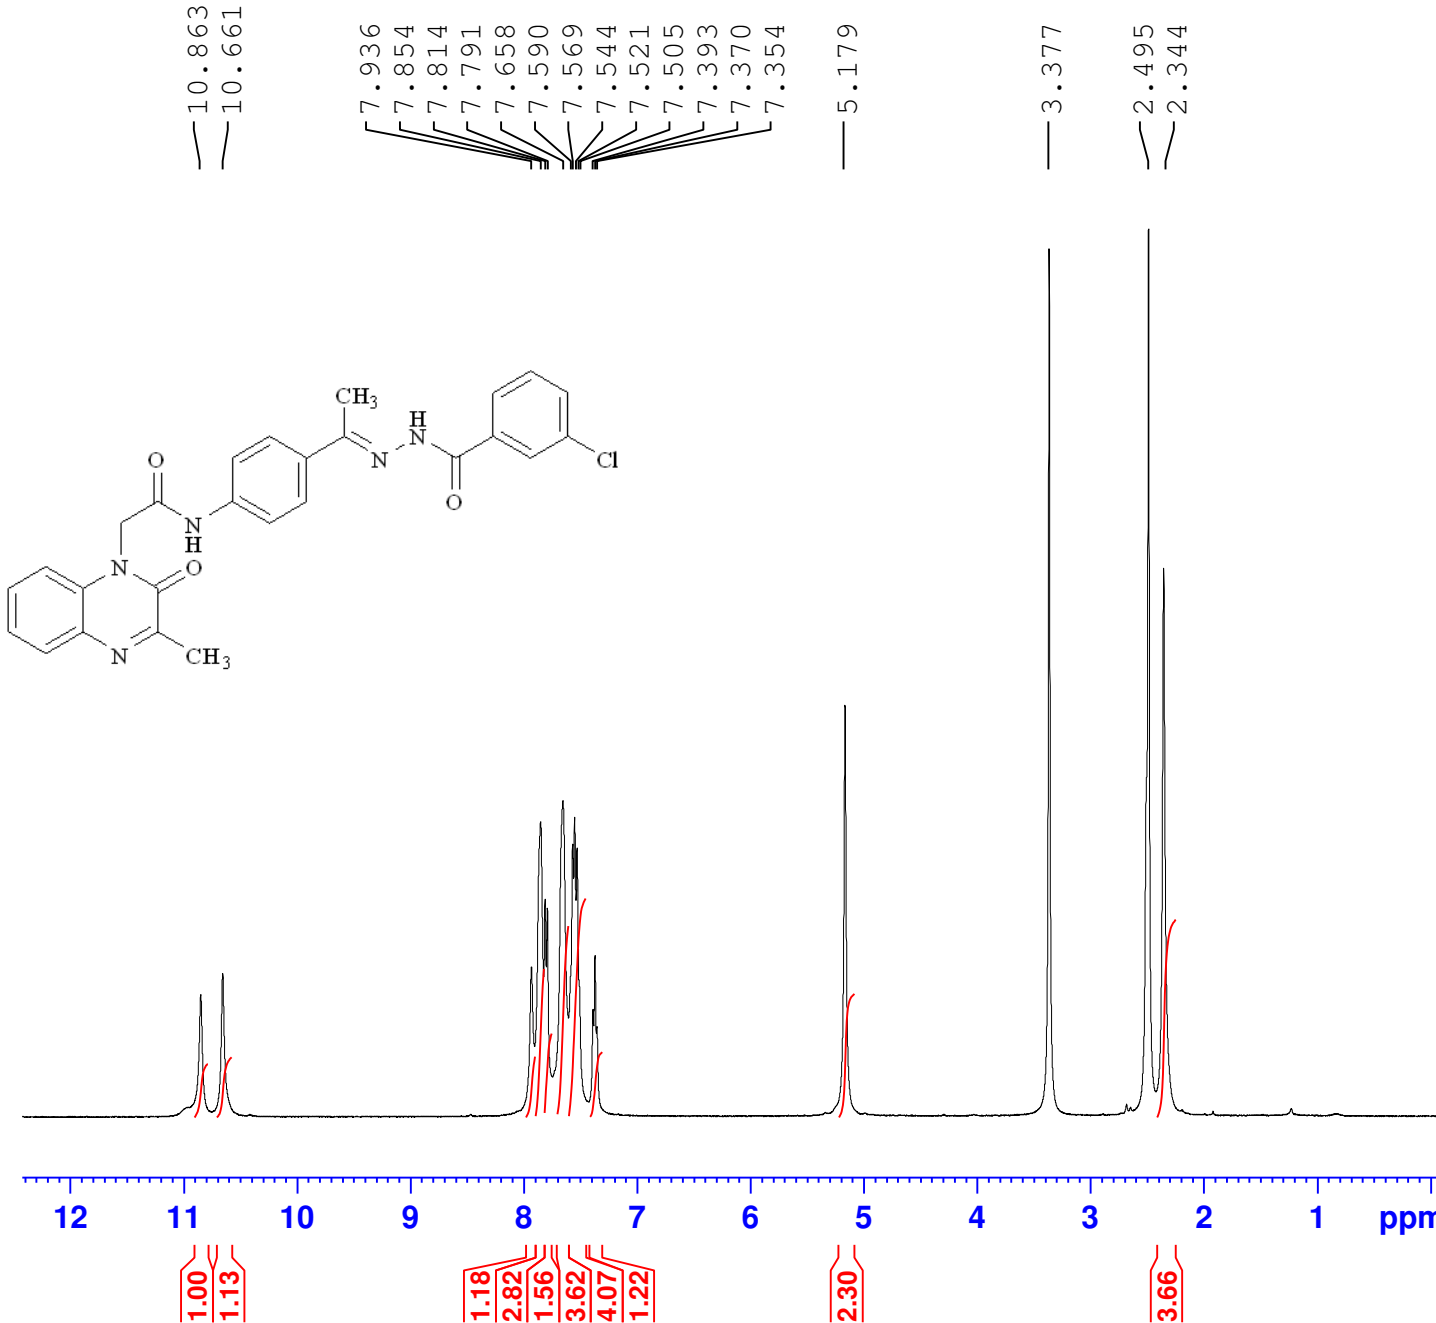

Current Data Parameters  
NAME reda-X5-a  
EXPNO 1  
PROCNO 1

F2 - Acquisition Parameters  
Date\_ 20180423  
Time 9.44  
INSTRUM spect  
PROBHD 5 mm PABBO BB/  
PULPROG zg30  
TD 65536  
SOLVENT DMSO  
NS 50  
DS 2  
SWH 8012.820 Hz  
FIDRES 0.122266 Hz  
AQ 4.0894465 sec  
RG 205.37  
DW 62.400 usec  
DE 6.50 usec  
TE 298.1 K  
D1 1.00000000 sec  
TD0 1

==== CHANNEL f1 =====  
SFO1 400.1524711 MHz  
NUC1 1H  
P1 12.00 usec  
PLW1 18.00000000 W

F2 - Processing parameters  
SI 65536  
SF 400.1500000 MHz  
WDW EM  
SSB 0  
LB 0.30 Hz  
GB 0  
PC 1.00

# H<sup>1</sup>NMR of compound (11c)

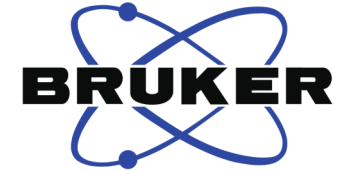

Current Data Parameters  
NAME reda-X5-a  
EXPNO 1  
PROCNO 1

F2 - Acquisition Parameters  
Date\_ 20180423  
Time 9.44  
INSTRUM spect  
PROBHD 5 mm PABBO BB/  
PULPROG zg30  
TD 65536  
SOLVENT DMSO  
NS 50  
DS 2  
SWH 8012.820 Hz  
FIDRES 0.122266 Hz  
AQ 4.0894465 sec  
RG 205.37  
DW 62.400 usec  
DE 6.50 usec  
TE 298.1 K  
D1 1.00000000 sec  
TD0 1

==== CHANNEL f1 =====  
SFO1 400.1524711 MHz  
NUC1 1H  
P1 12.00 usec  
PLW1 18.00000000 W

F2 - Processing parameters  
SI 65536  
SF 400.1500000 MHz  
WDW EM  
SSB 0  
LB 0.30 Hz  
GB 0  
PC 1.00

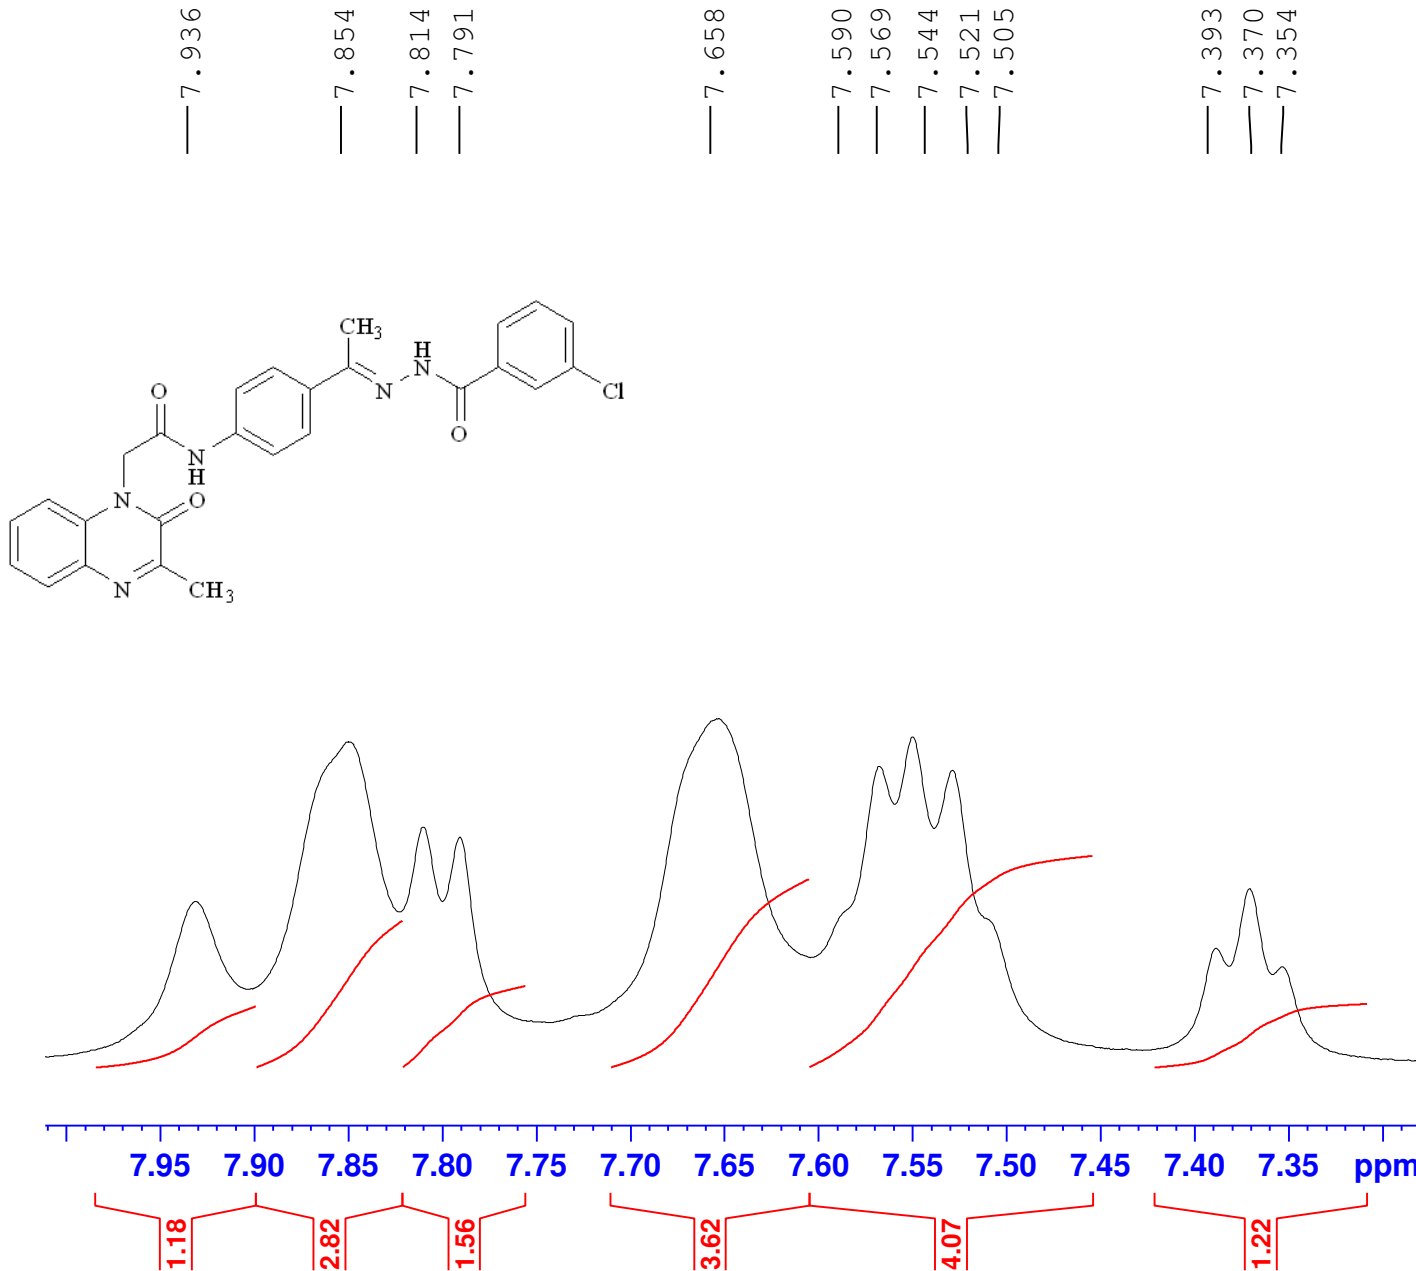

# H<sup>1</sup>NMR (D<sub>2</sub>O) of compound (11c)

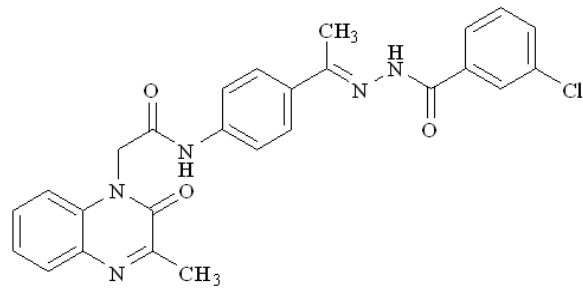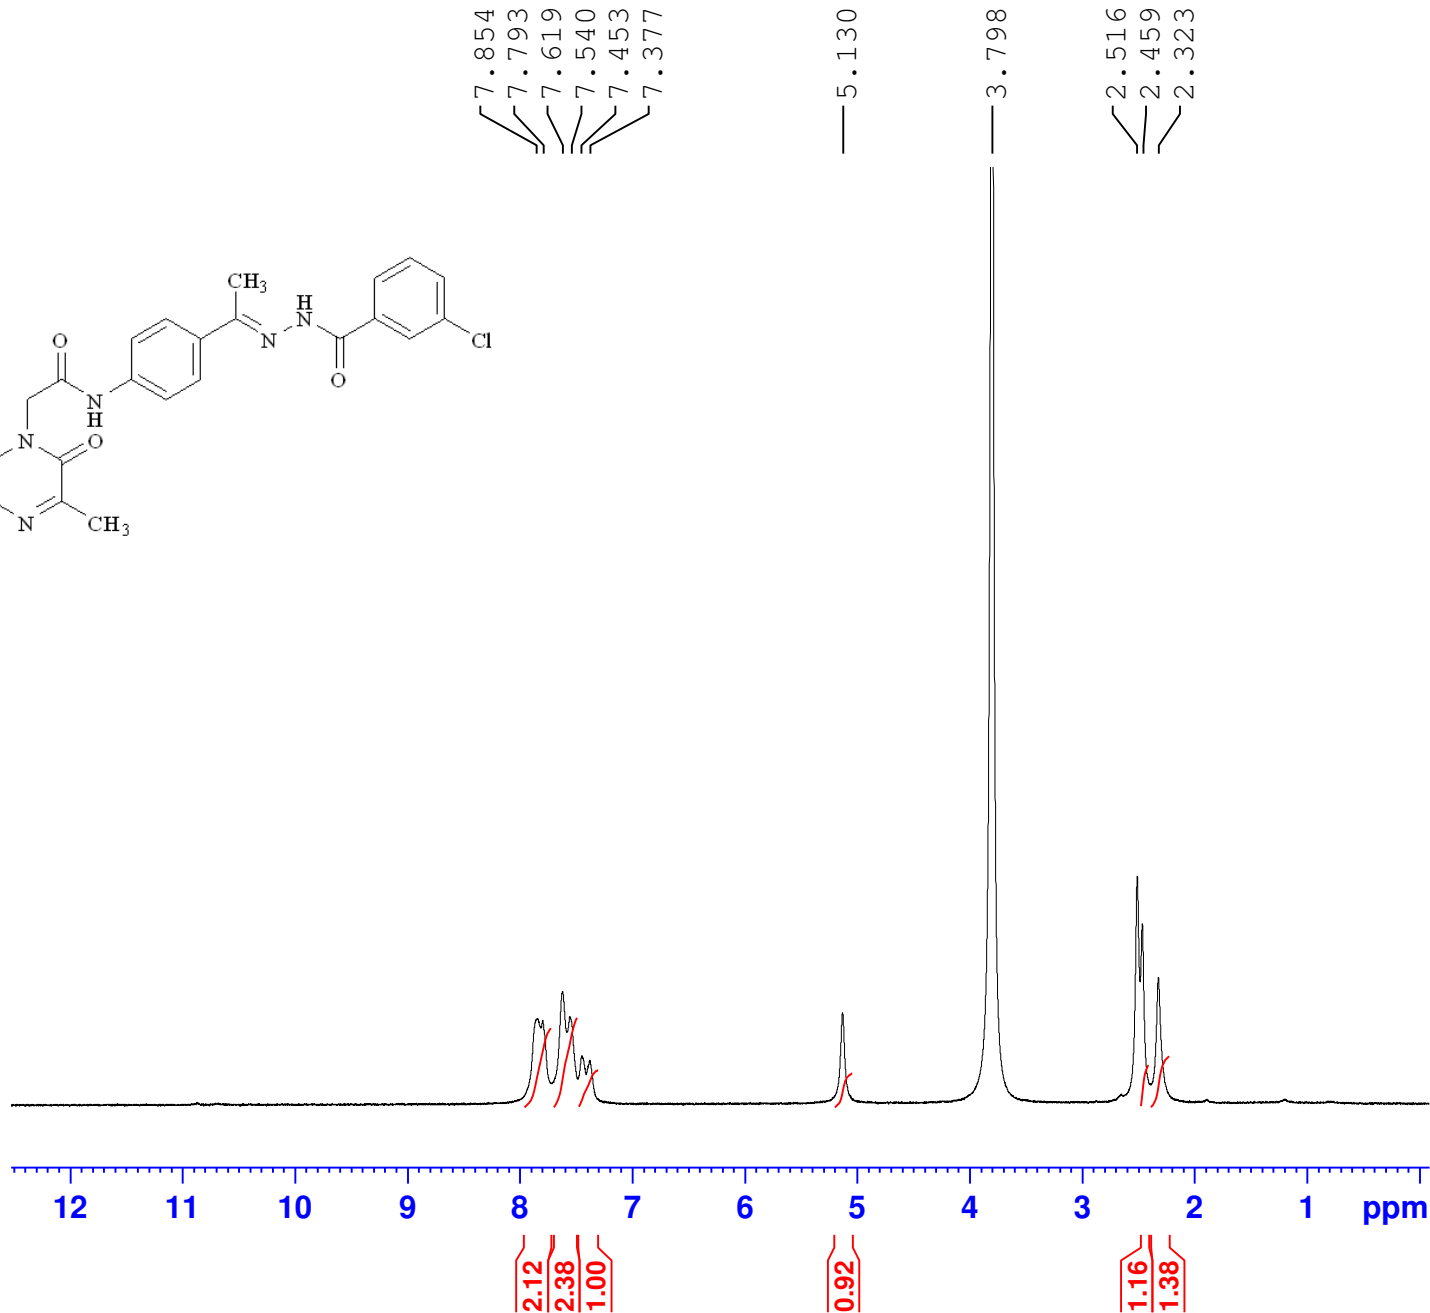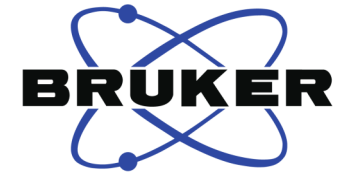

Current Data Parameters  
NAME reda-X5-a-d2o  
EXPNO 1  
PROCNO 1

F2 - Acquisition Parameters  
Date\_ 20180423  
Time 9.58  
INSTRUM spect  
PROBHD 5 mm PABBO BB/  
PULPROG zg30  
TD 65536  
SOLVENT DMSO  
NS 58  
DS 2  
SWH 8012.820 Hz  
FIDRES 0.122266 Hz  
AQ 4.0894465 sec  
RG 205.37  
DW 62.400 usec  
DE 6.50 usec  
TE 298.1 K  
D1 1.00000000 sec  
TD0 1

==== CHANNEL f1 =====  
SFO1 400.1524711 MHz  
NUC1 1H  
P1 12.00 usec  
PLW1 18.00000000 W

F2 - Processing parameters  
SI 65536  
SF 400.1500000 MHz  
WDW EM  
SSB 0  
LB 0.30 Hz  
GB 0  
PC 1.00

IR of compound 11d

SHIMADZU

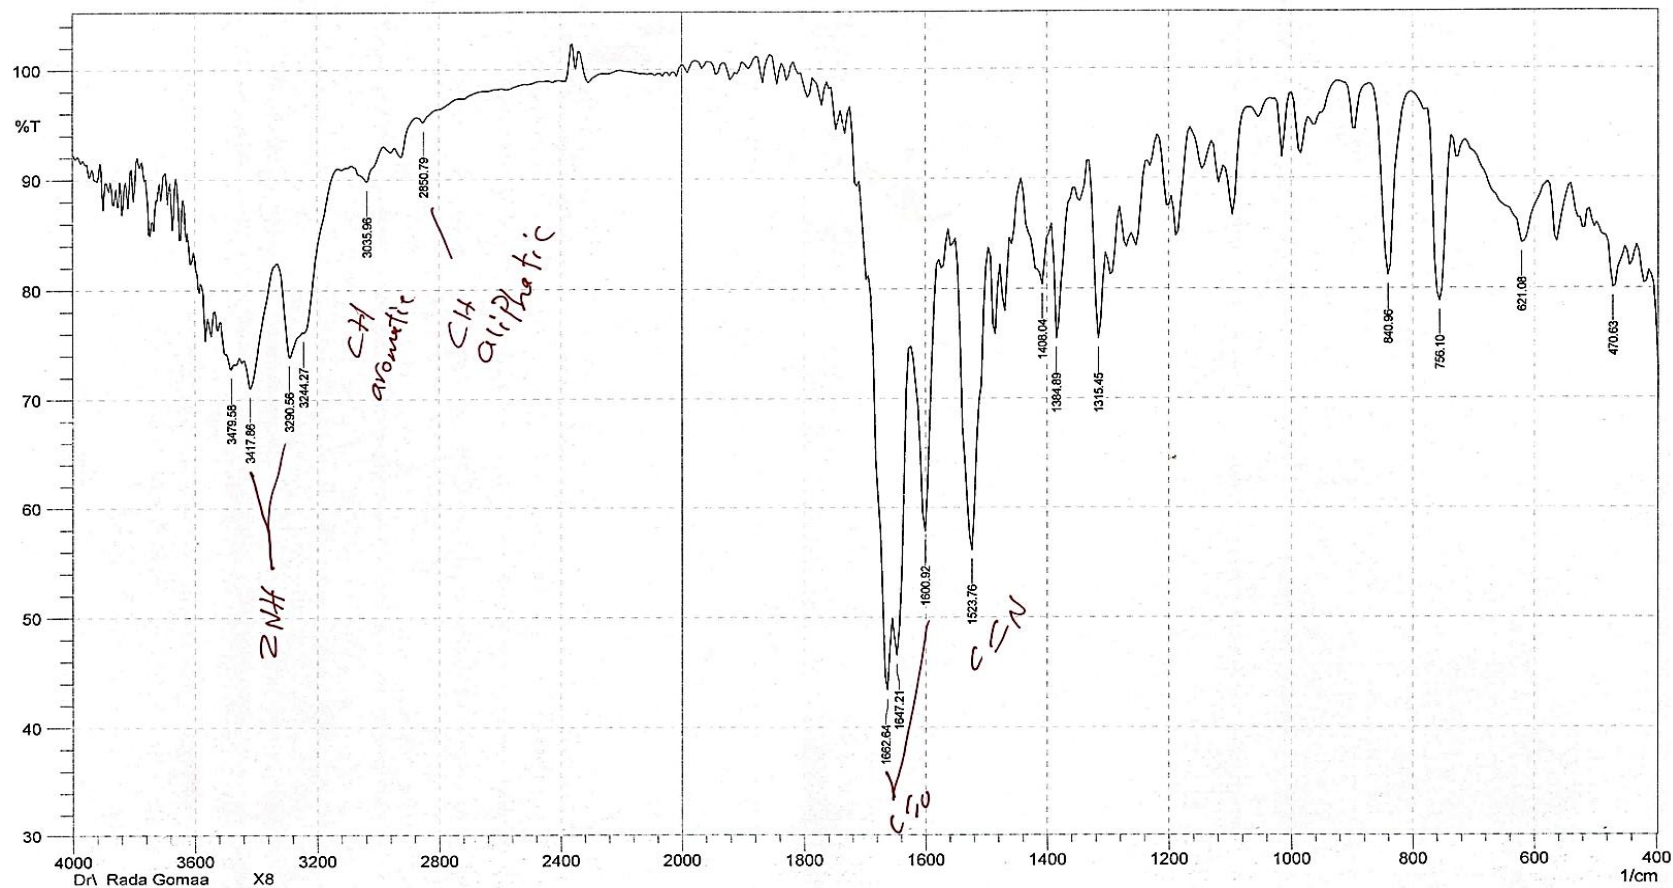

Comment; .....  
Dr\ Rada Gomaa X8

No. of Scans; 8  
Resolution; 8 [1/cm]

Date/Time; 11/11/2018 11:22:06 AM  
User; usama

# H<sup>1</sup>NMR of compound (11d)

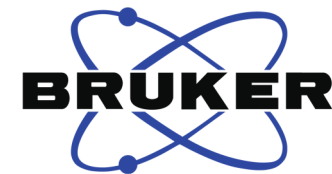

Current Data Parameters  
NAME reda-X8  
EXPNO 1  
PROCNO 1

F2 - Acquisition Parameters  
Date\_ 20180423  
Time 9.51  
INSTRUM spect  
PROBHD 5 mm PABBO BB/  
PULPROG zg30  
TD 65536  
SOLVENT DMSO  
NS 41  
DS 2  
SWH 8012.820 Hz  
FIDRES 0.122266 Hz  
AQ 4.0894465 sec  
RG 205.37  
DW 62.400 usec  
DE 6.50 usec  
TE 298.1 K  
D1 1.00000000 sec  
TD0 1

==== CHANNEL f1 =====  
SFO1 400.1524711 MHz  
NUC1 1H  
P1 12.00 usec  
PLW1 18.00000000 W

F2 - Processing parameters  
SI 65536  
SF 400.1500000 MHz  
WDW EM  
SSB 0  
LB 0.30 Hz  
GB 0  
PC 1.00

10.807  
10.667

7.915  
7.846  
7.801  
7.650  
7.576  
7.361

5.205

3.352

2.483  
2.357

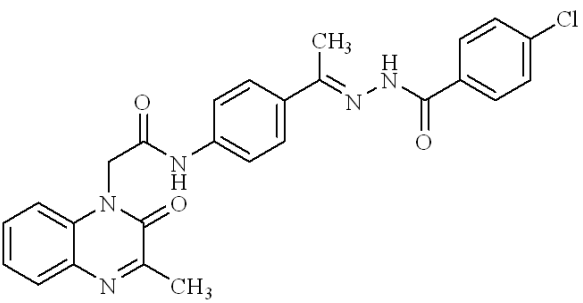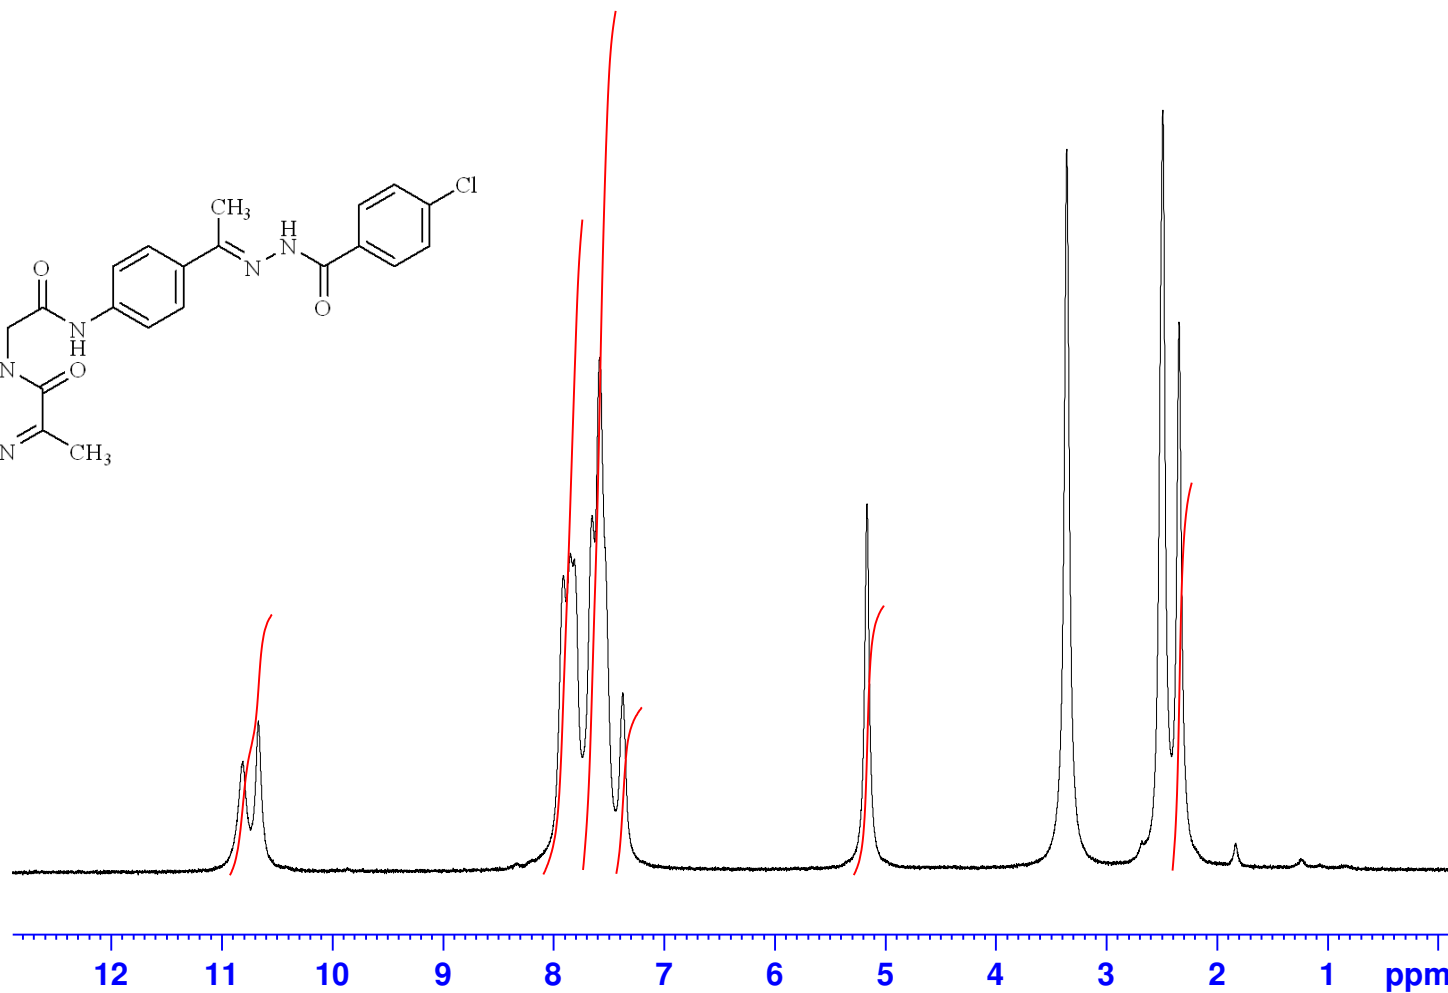

12 11 10 9 8 7 6 5 4 3 2 1 ppm

1.00

2.52  
3.32  
0.65

1.04

1.51

# H<sup>1</sup>NMR of compound (11e)



Current Data Parameters  
 NAME reda-X6  
 EXPNO 1  
 PROCNO 1

F2 - Acquisition Parameters  
 Date\_ 20180423  
 Time 10.14  
 INSTRUM spect  
 PROBHD 5 mm PABBO BB/  
 PULPROG zg30  
 TD 65536  
 SOLVENT DMSO  
 NS 64  
 DS 2  
 SWH 8012.820 Hz  
 FIDRES 0.122266 Hz  
 AQ 4.0894465 sec  
 RG 205.37  
 DW 62.400 usec  
 DE 6.50 usec  
 TE 298.0 K  
 D1 1.00000000 sec  
 TD0 1

==== CHANNEL f1 =====  
 SFO1 400.1524711 MHz  
 NUC1 1H  
 P1 12.00 usec  
 PLW1 18.00000000 W

F2 - Processing parameters  
 SI 65536  
 SF 400.1500000 MHz  
 WDW EM  
 SSB 0  
 LB 0.30 Hz  
 GB 0  
 PC 1.00

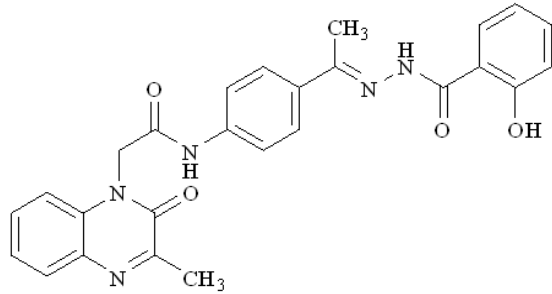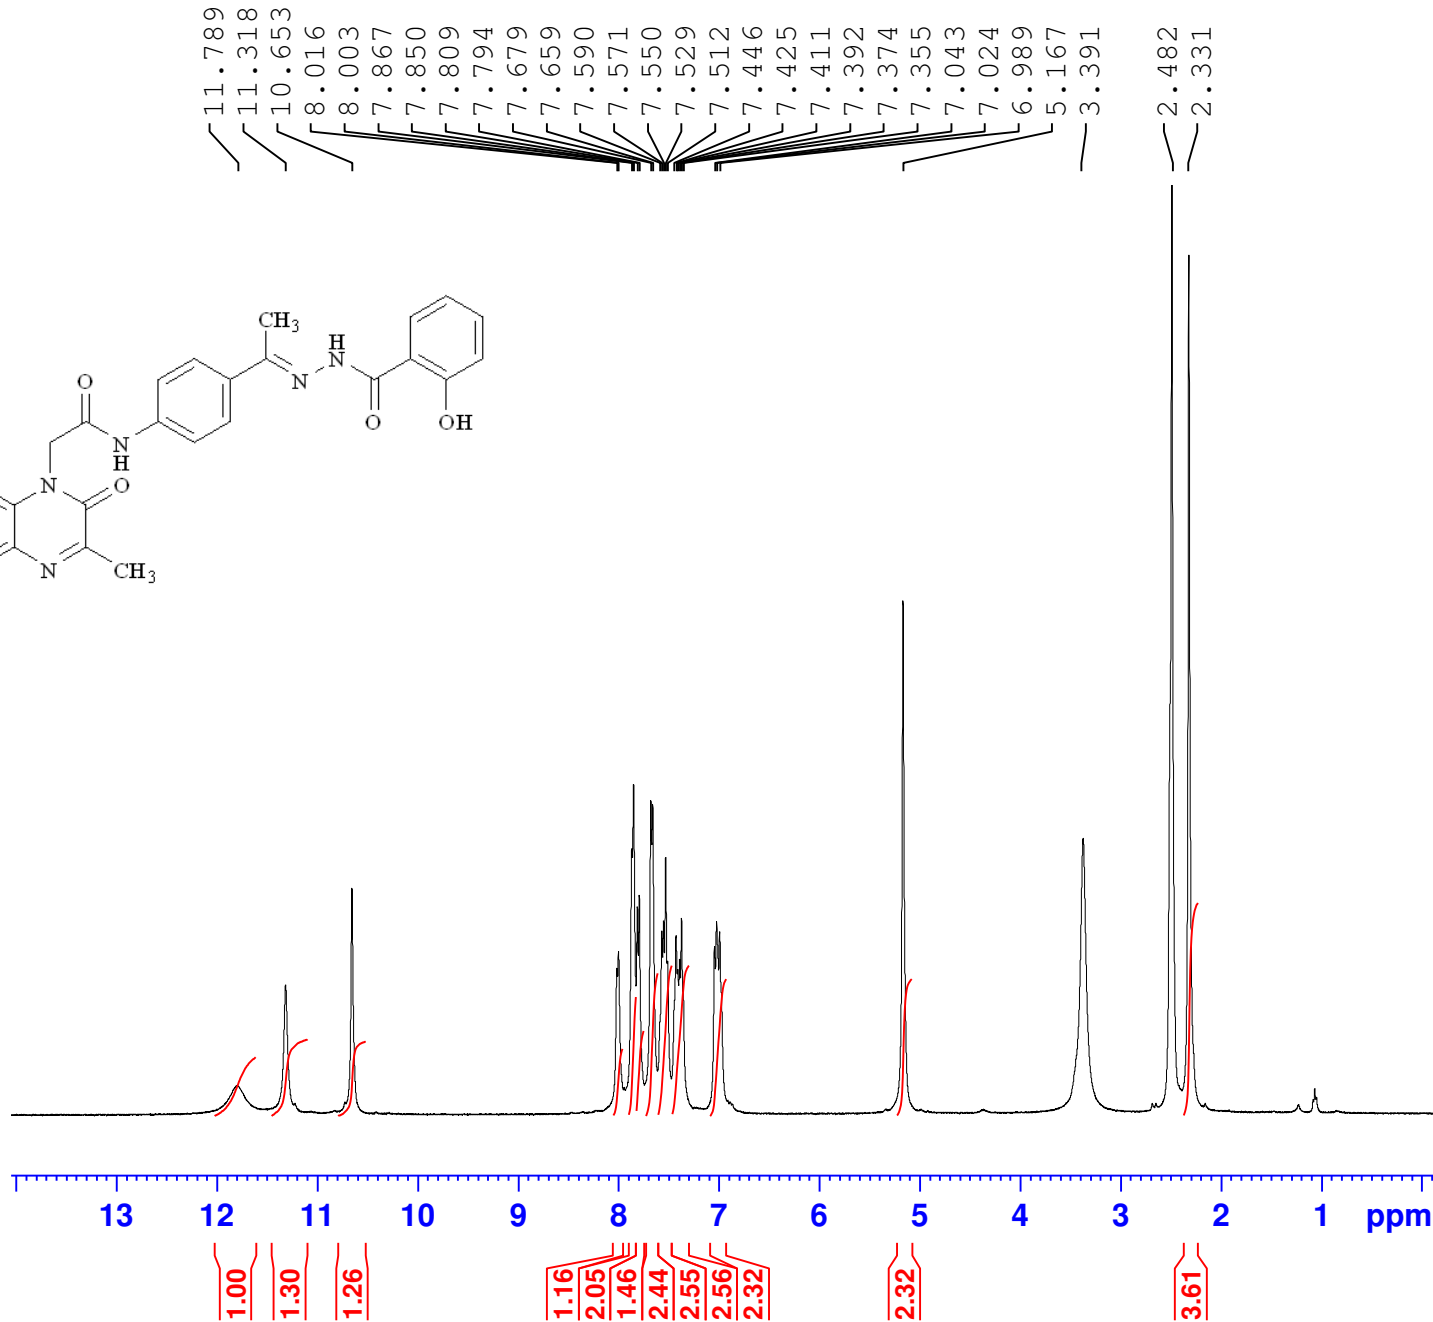

# $^1\text{H}$ NMR of compound (11e)

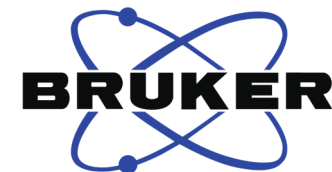

8.016  
8.003

7.867  
7.850  
7.809  
7.794

7.679  
7.659  
7.590  
7.571  
7.550  
7.529  
7.512  
7.446  
7.425  
7.411  
7.392  
7.374  
7.355

7.043  
7.024  
6.989

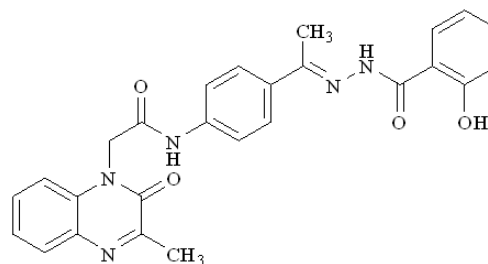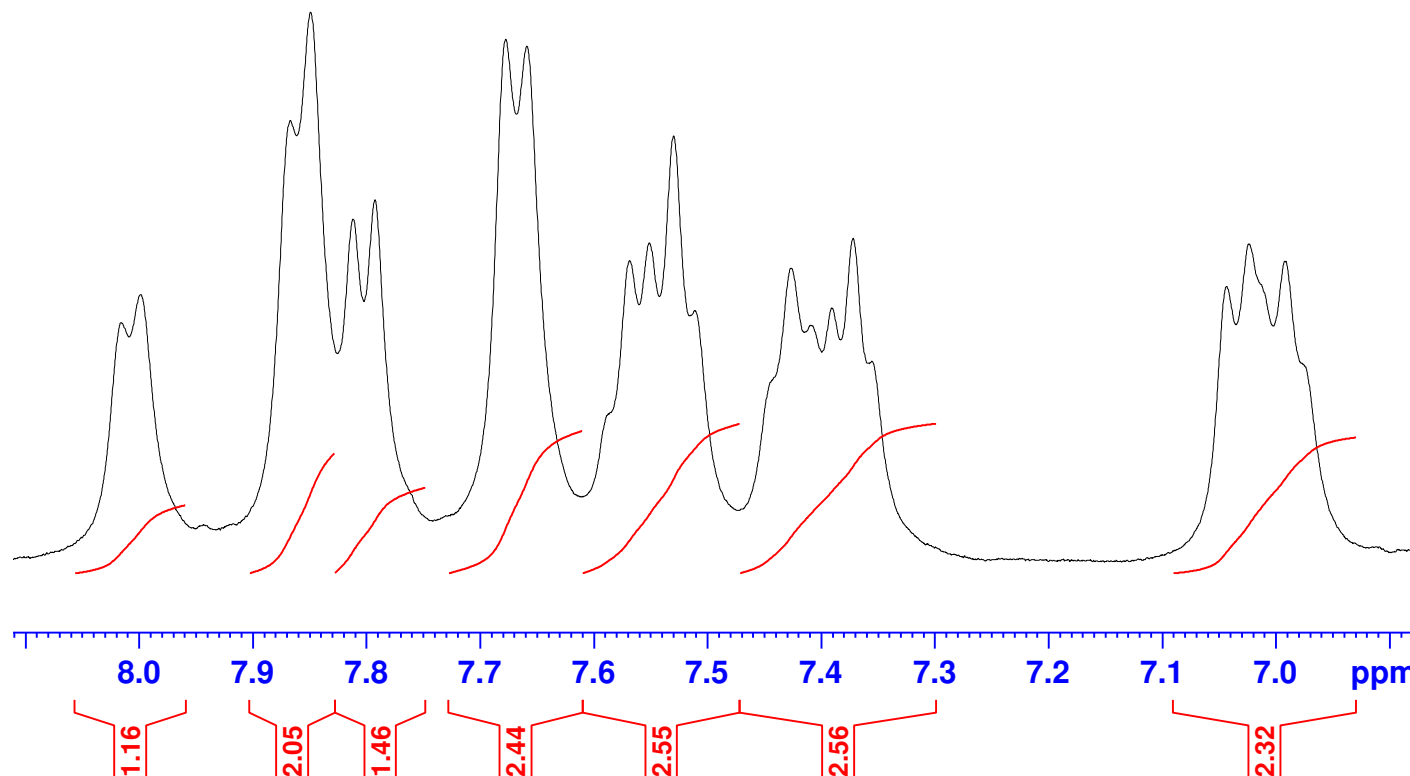

Current Data Parameters  
NAME reda-X6  
EXPNO 1  
PROCNO 1

F2 - Acquisition Parameters  
Date\_ 20180423  
Time 10.14  
INSTRUM spect  
PROBHD 5 mm PABBO BB/  
PULPROG zg30  
TD 65536  
SOLVENT DMSO  
NS 64  
DS 2  
SWH 8012.820 Hz  
FIDRES 0.122266 Hz  
AQ 4.0894465 sec  
RG 205.37  
DW 62.400 usec  
DE 6.50 usec  
TE 298.0 K  
D1 1.00000000 sec  
TD0 1

==== CHANNEL f1 =====  
SFO1 400.1524711 MHz  
NUC1 1H  
P1 12.00 usec  
PLW1 18.00000000 W

F2 - Processing parameters  
SI 65536  
SF 400.1500000 MHz  
WDW EM  
SSB 0  
LB 0.30 Hz  
GB 0  
PC 1.00



Mass spec. of compound 11e

eda-alsyed-gomaa-rg-x6\_190302094241 #219 RT: 3.68 AV: 1 NL: 7.94E4  
: {0,0} + c EI Full ms [40.00-1000.00]

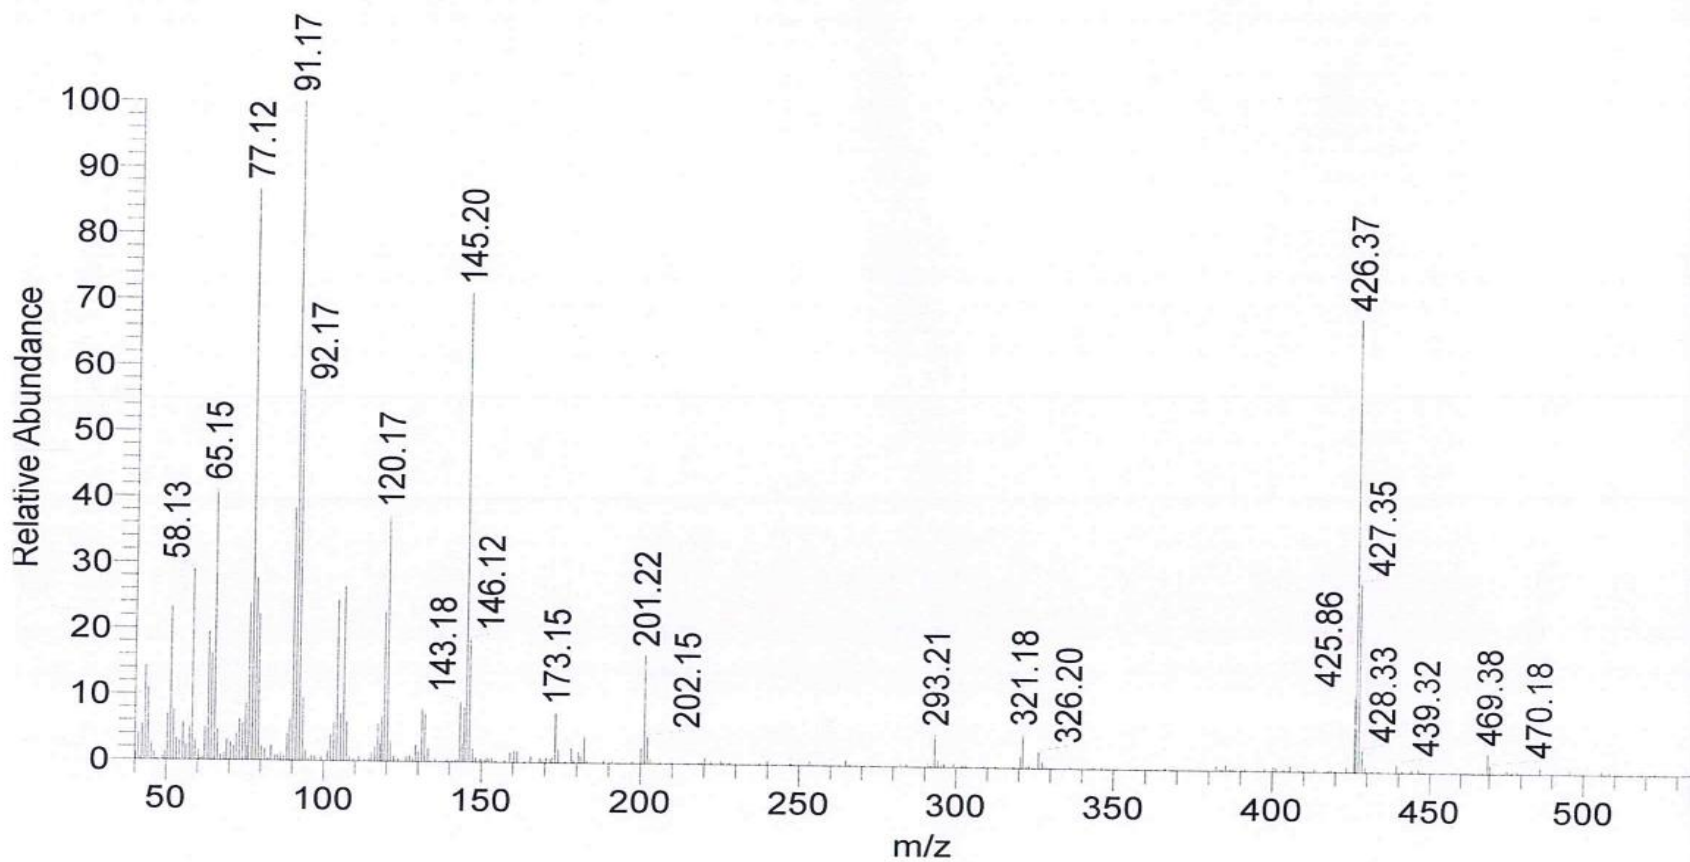

# H<sup>1</sup>NMR of compound (11f)

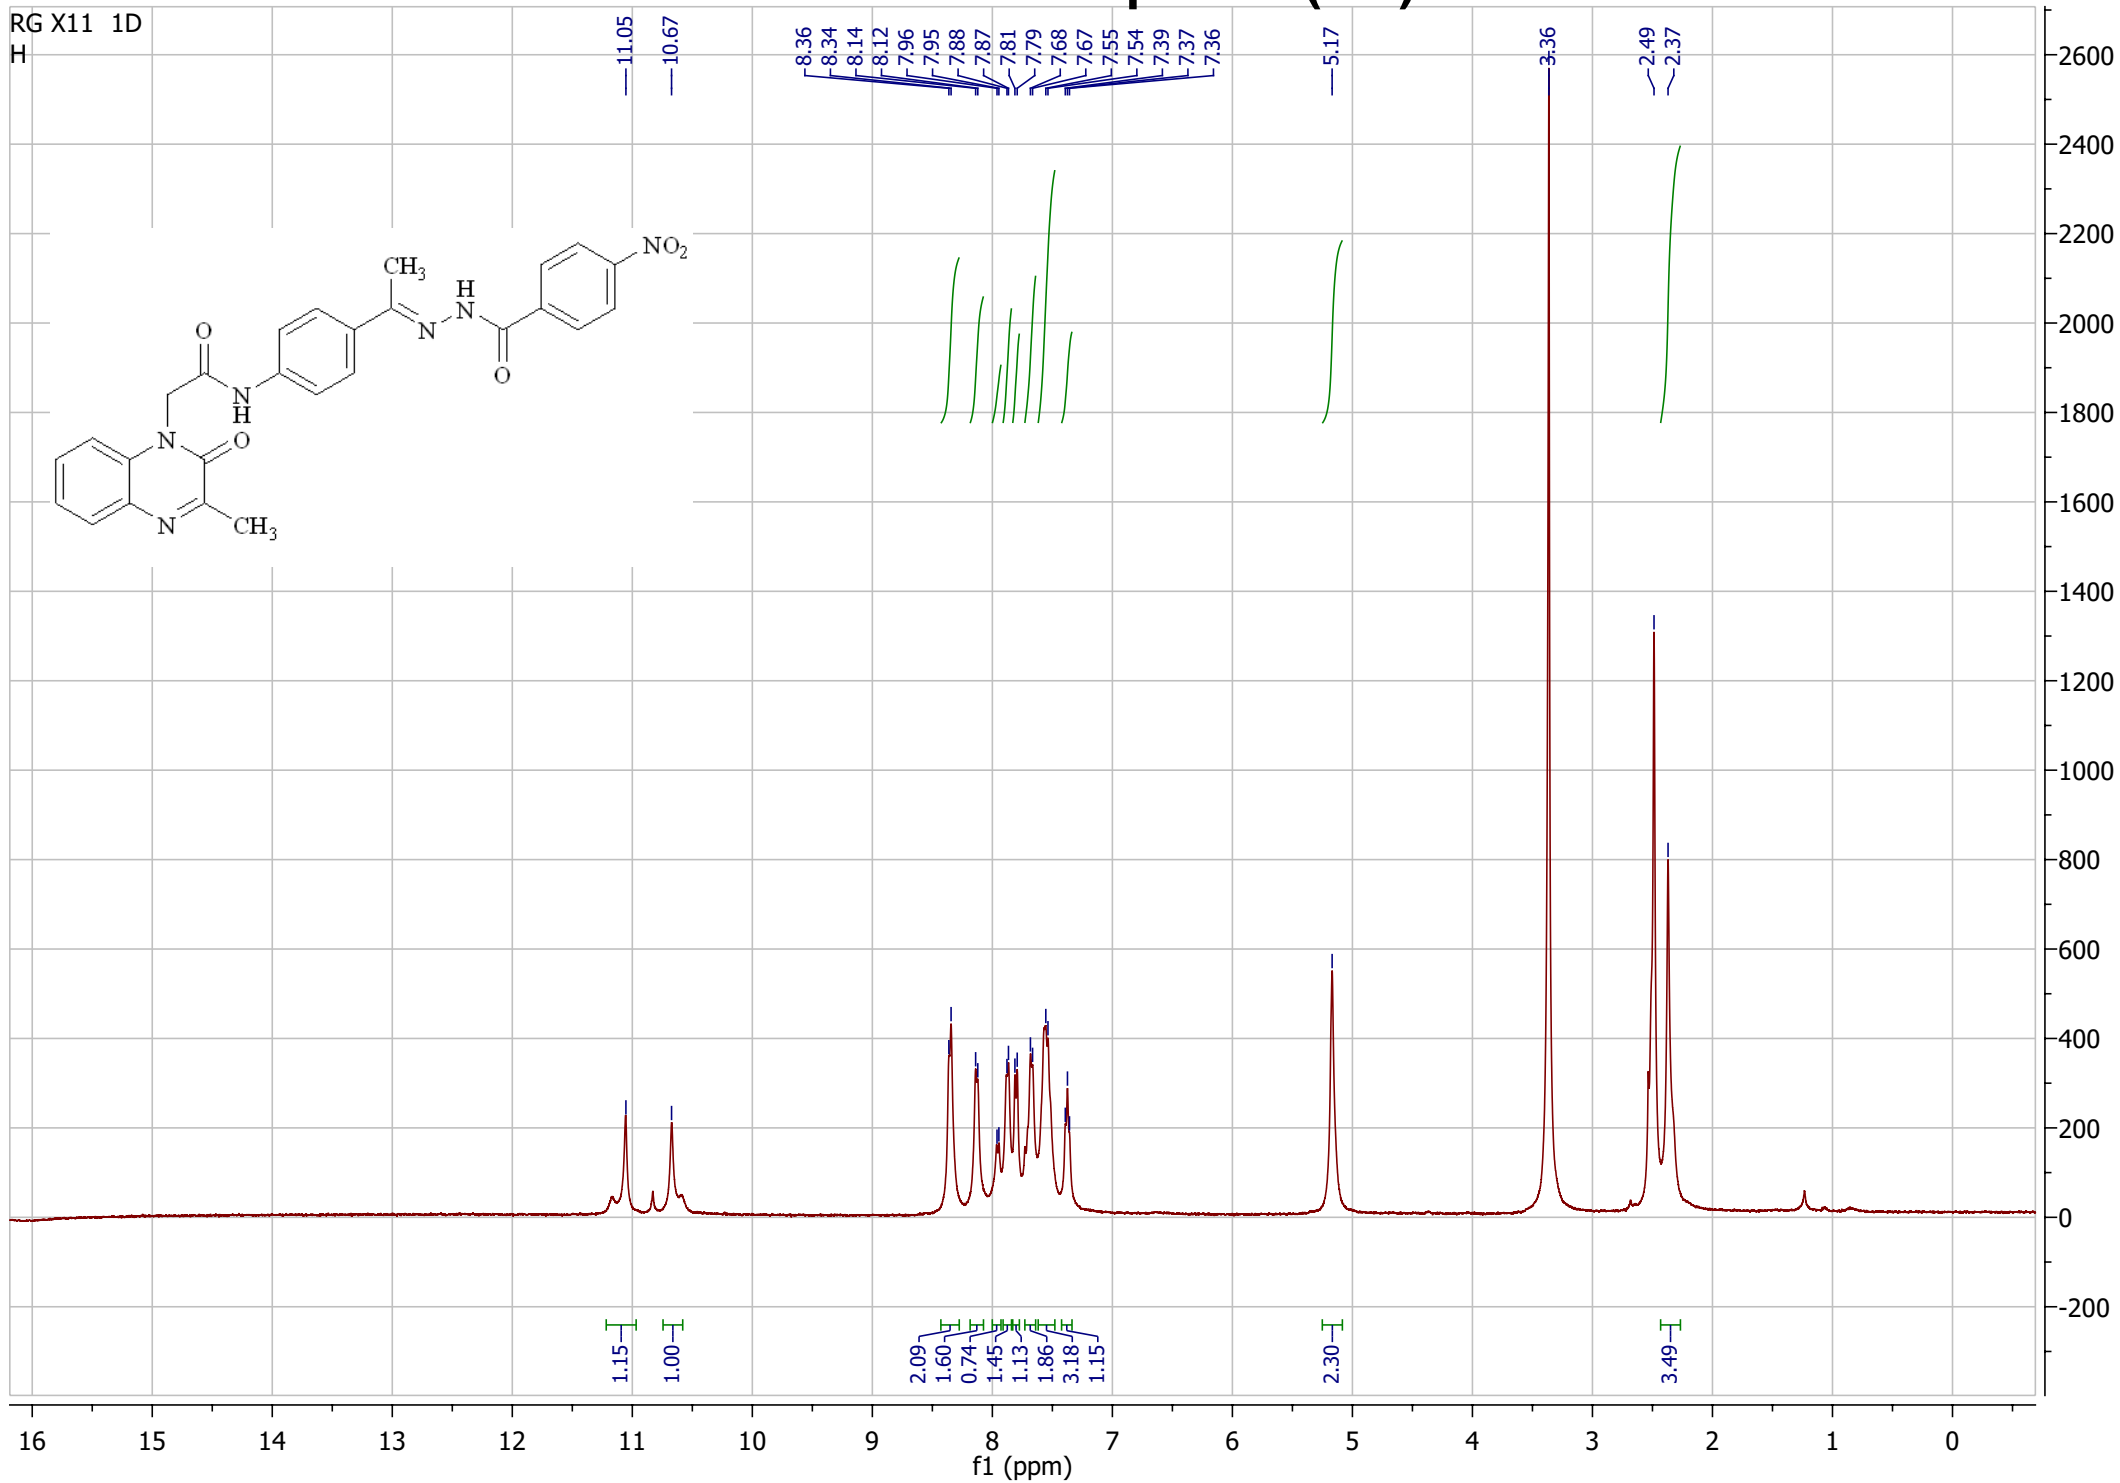

IR of compound 11f

SHIMADZU

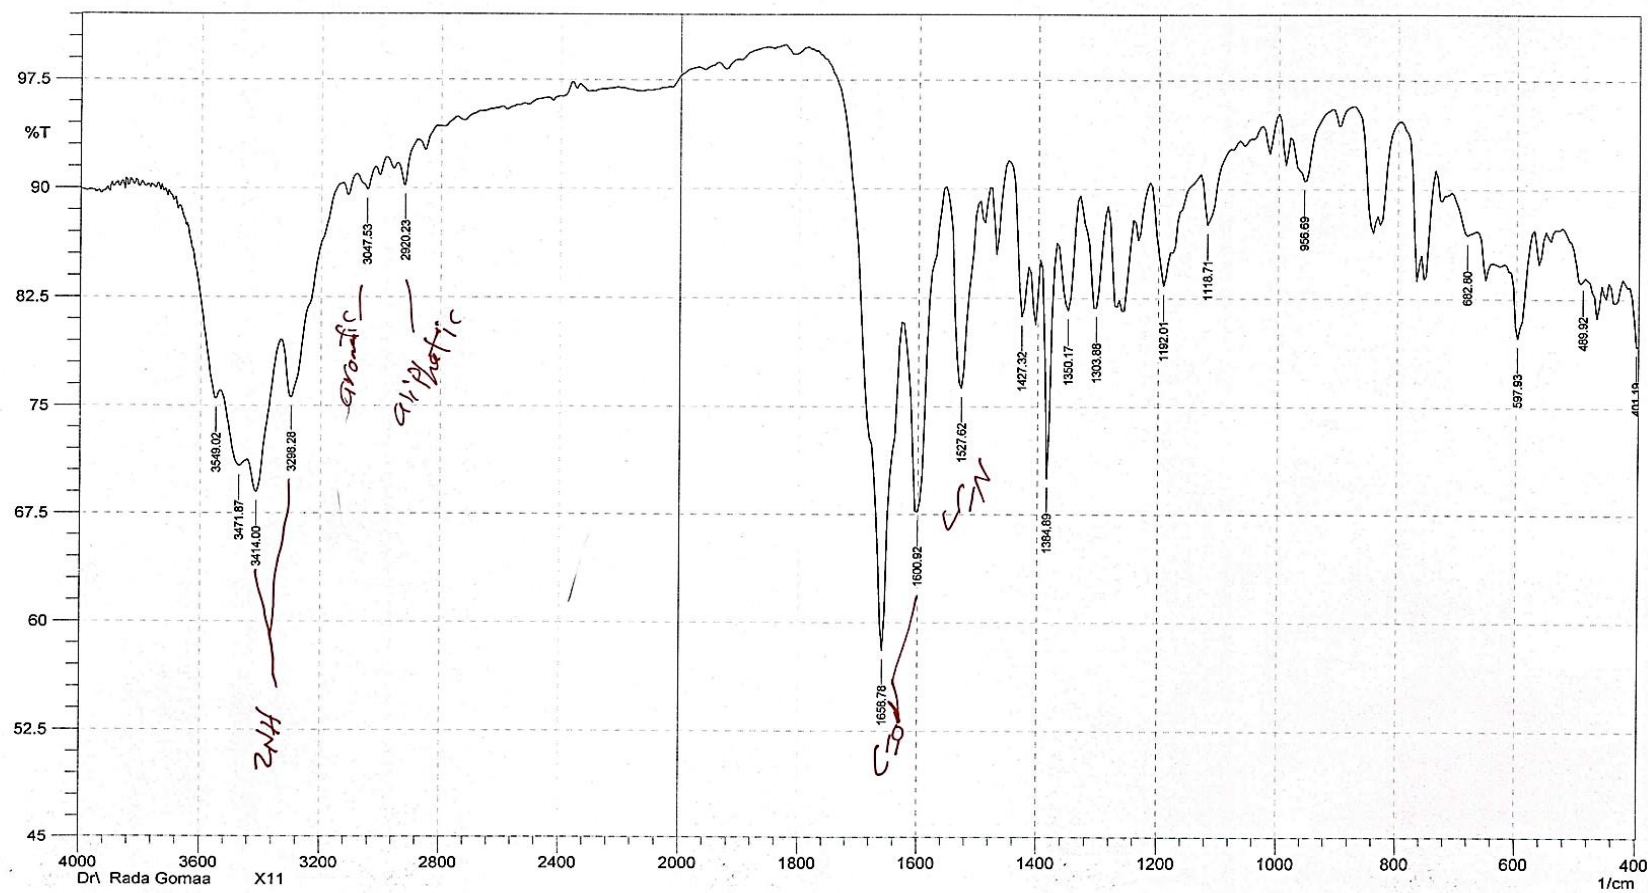

Comment;

Dr\ Rada Goma X11

No. of Scans; 8

Resolution; 8 [1/cm]

Date/Time; 11/11/2018 11:30:37 AM

User; usama

# H<sup>1</sup>NMR of compound (11f)

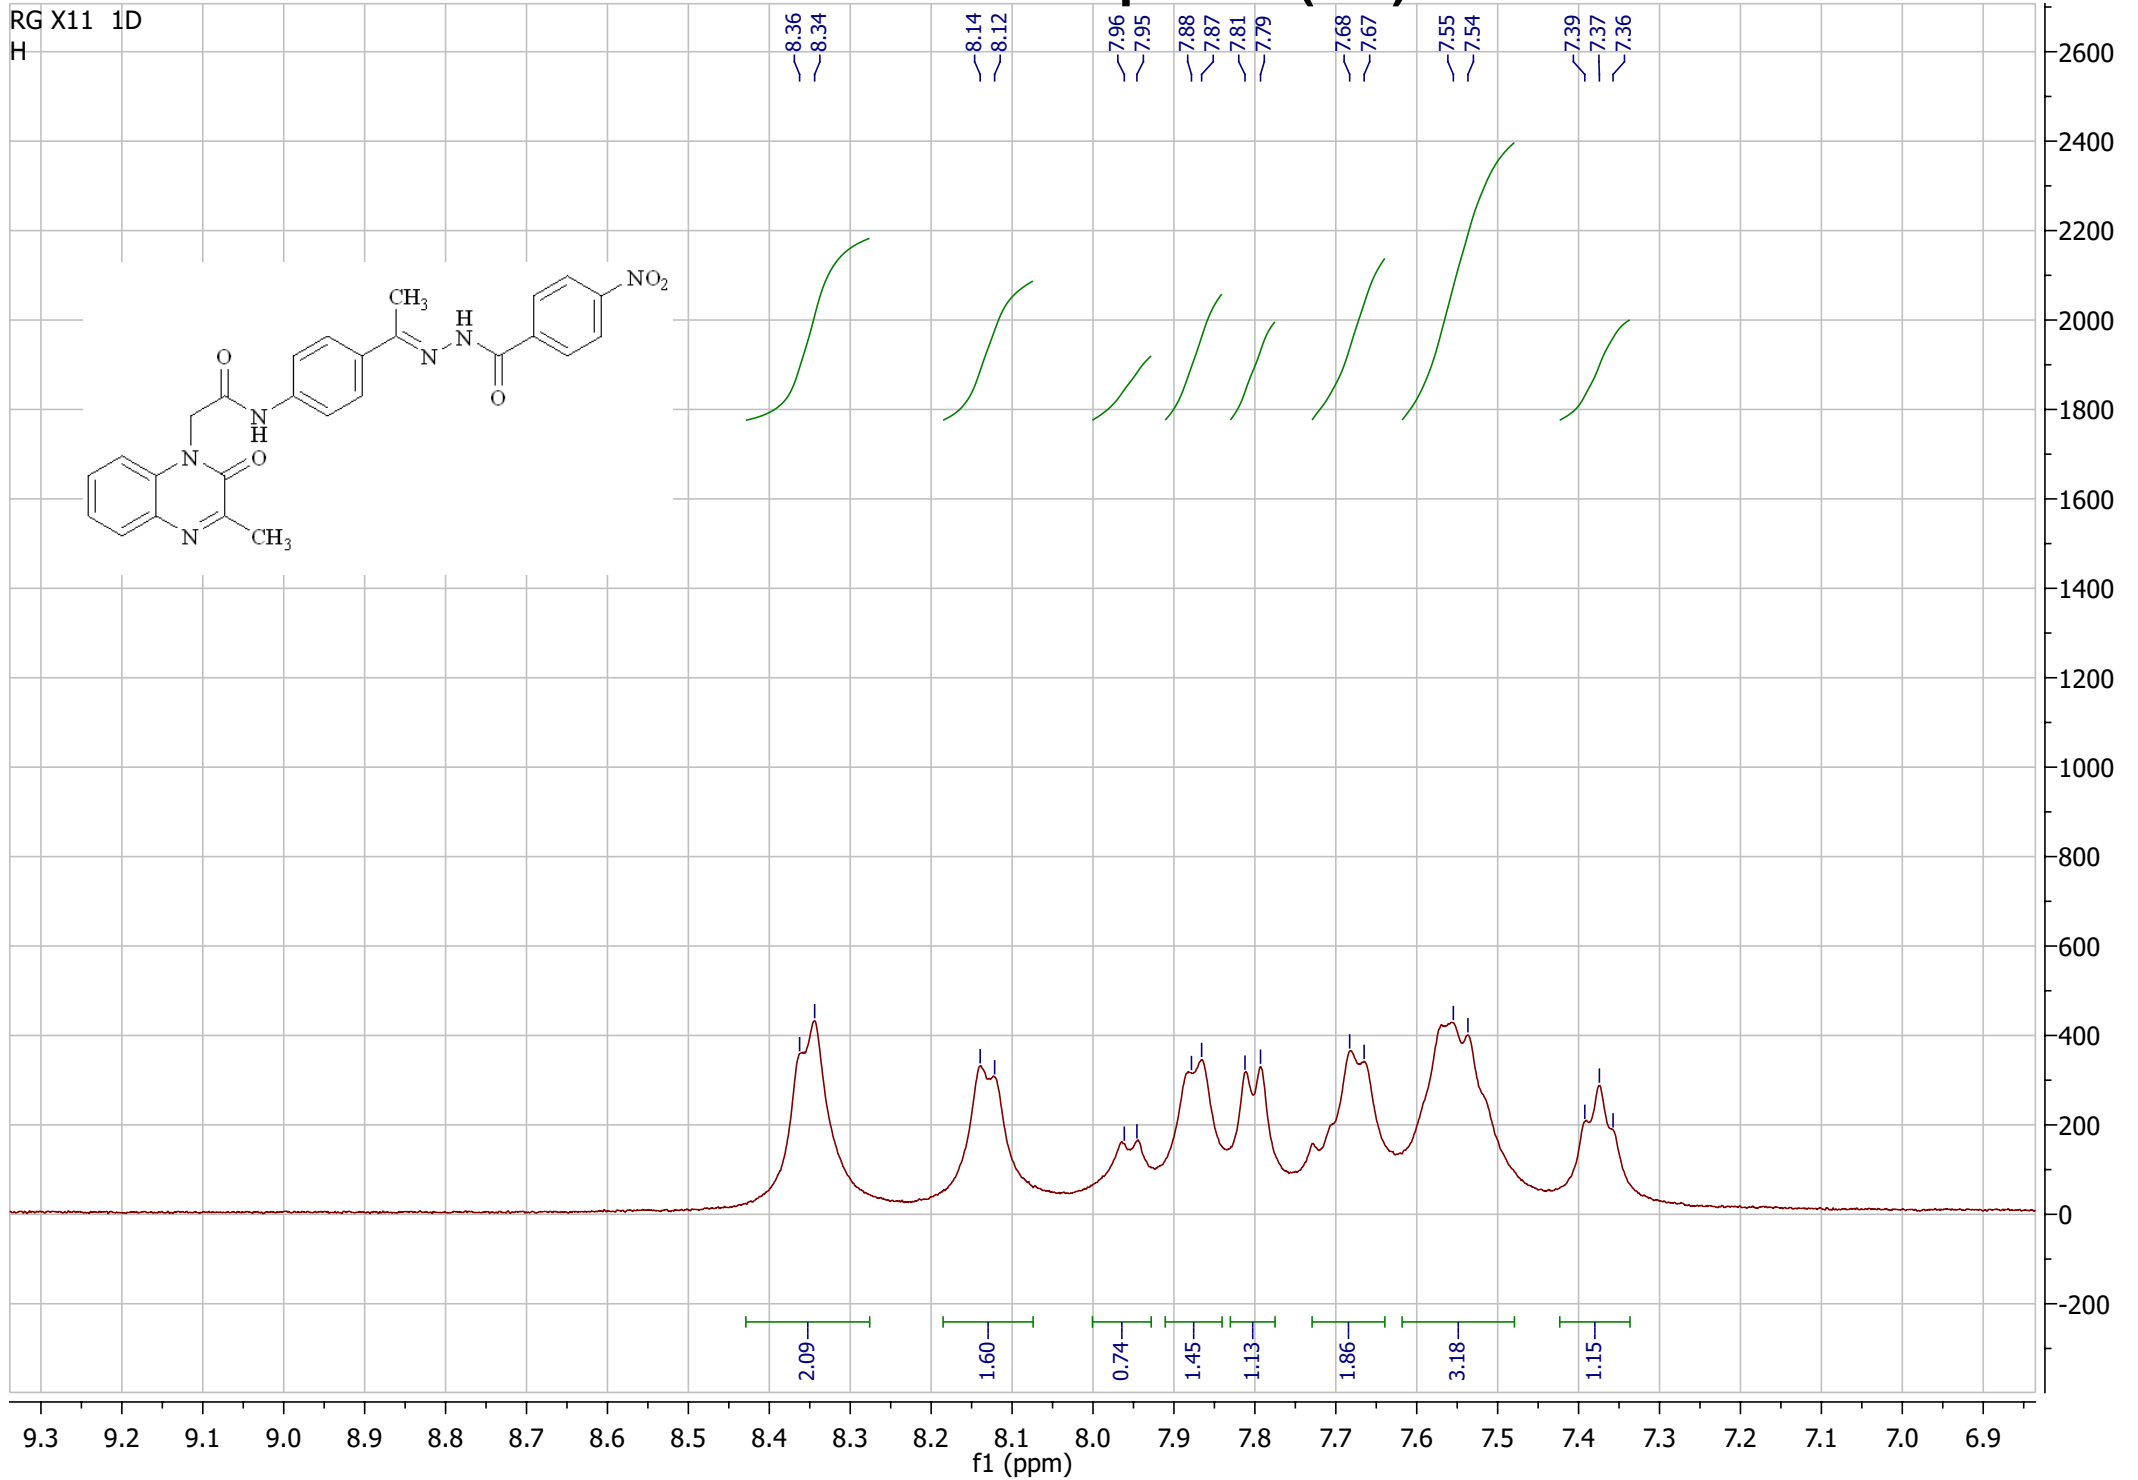

# C<sup>13</sup>NMR of compound (11f)

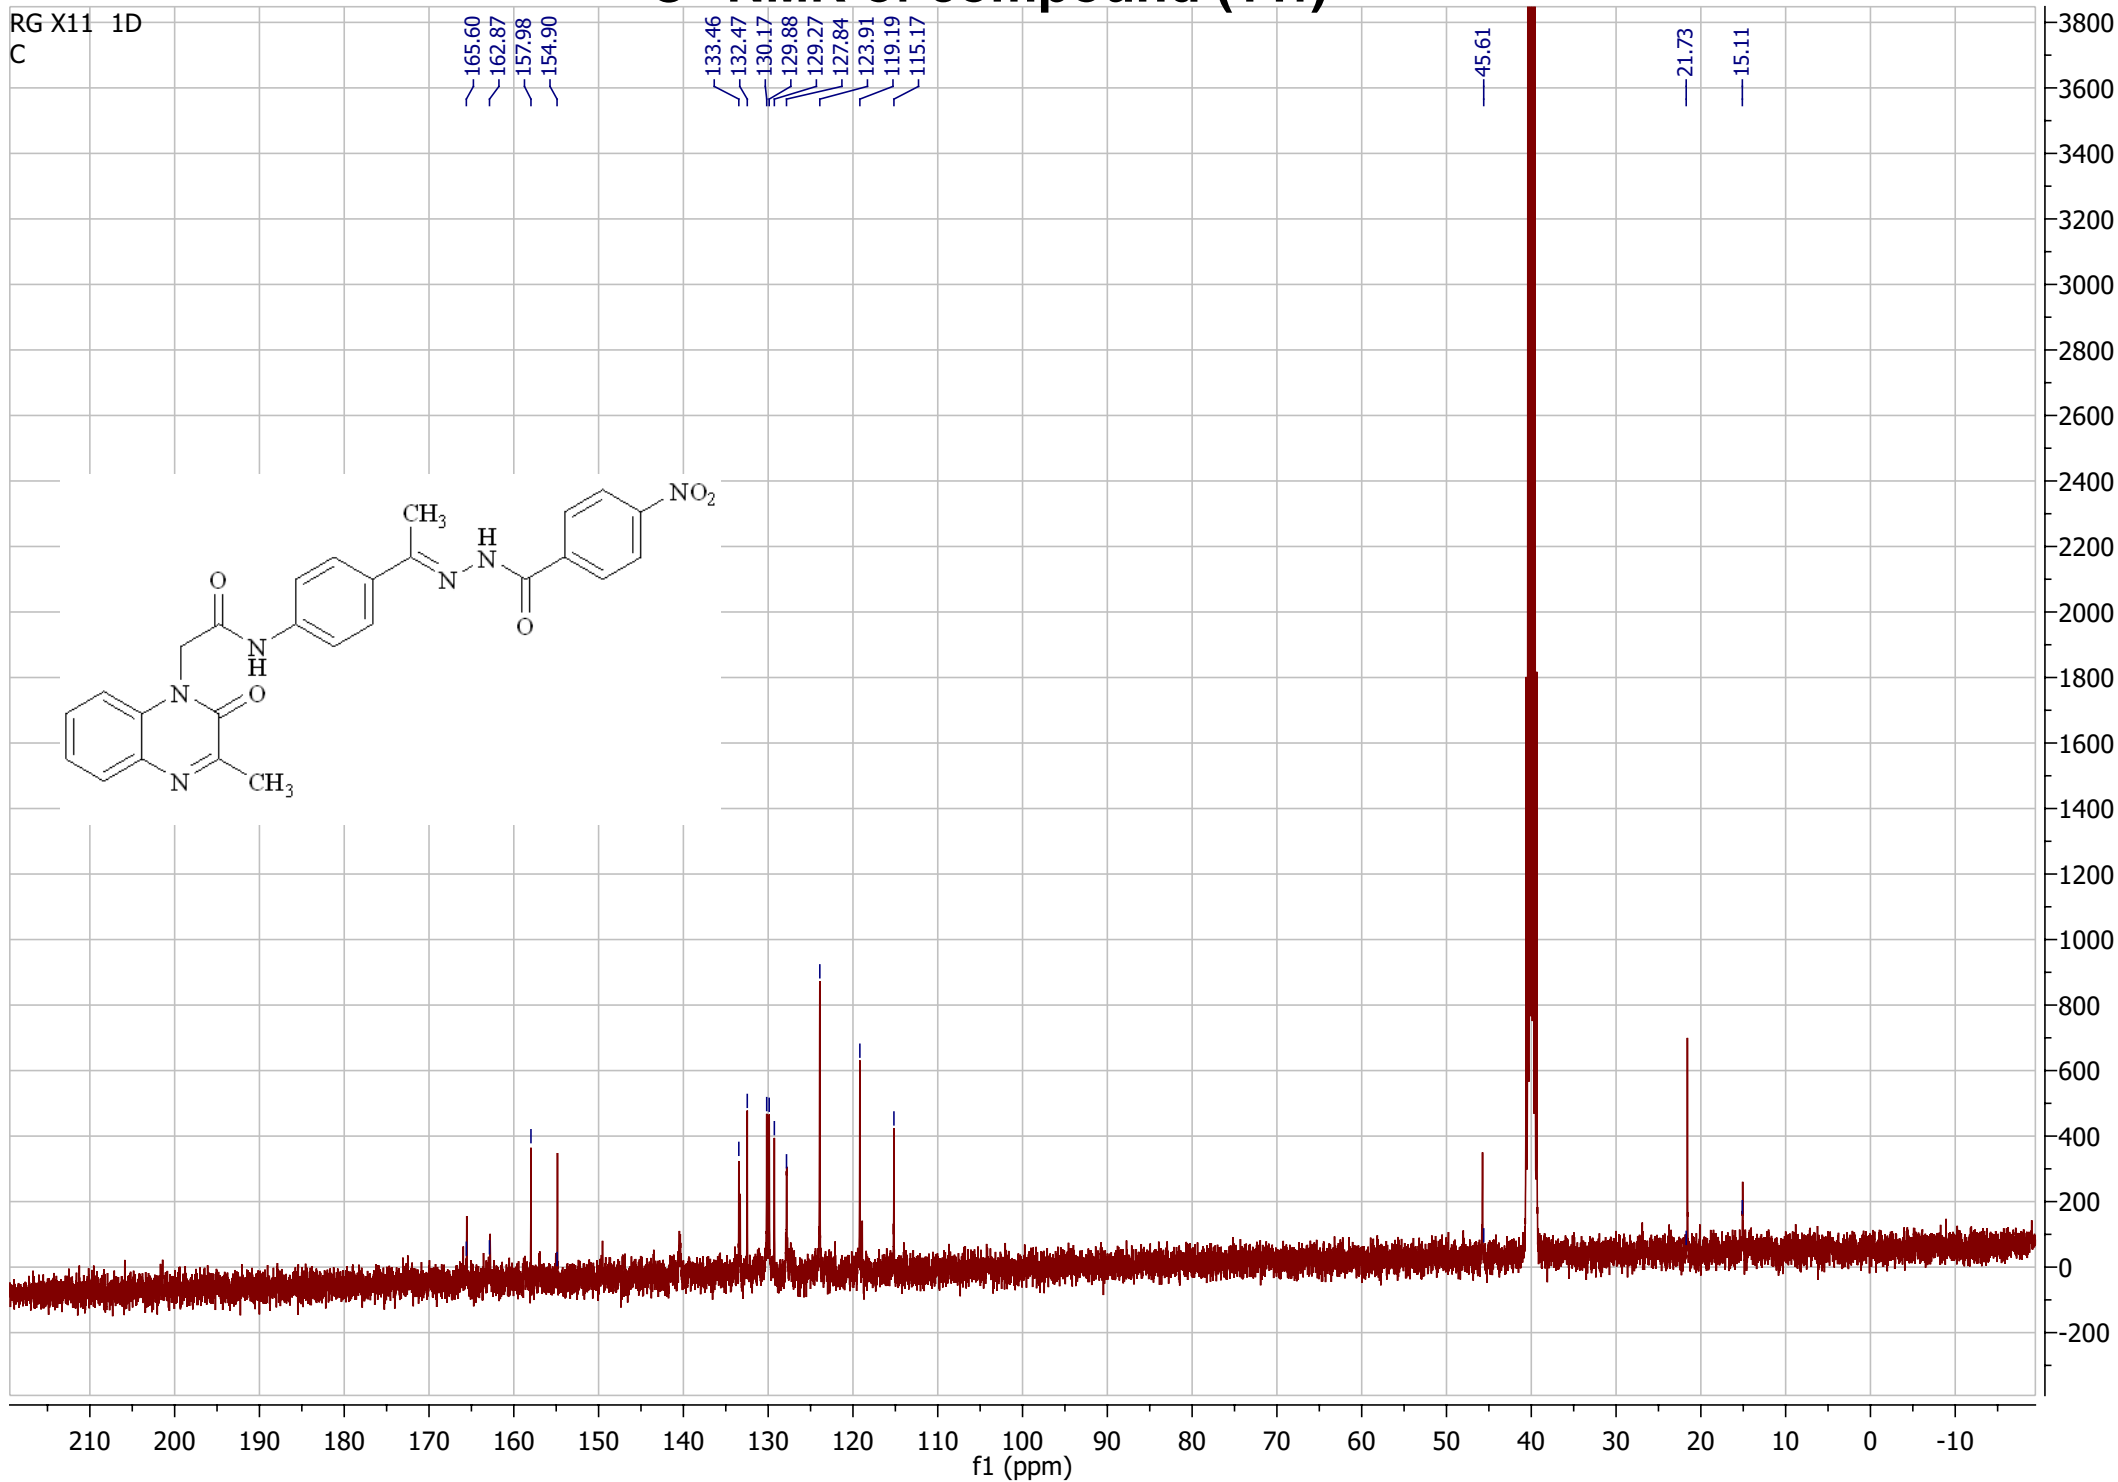

# C<sup>13</sup>NMR of compound (11f)

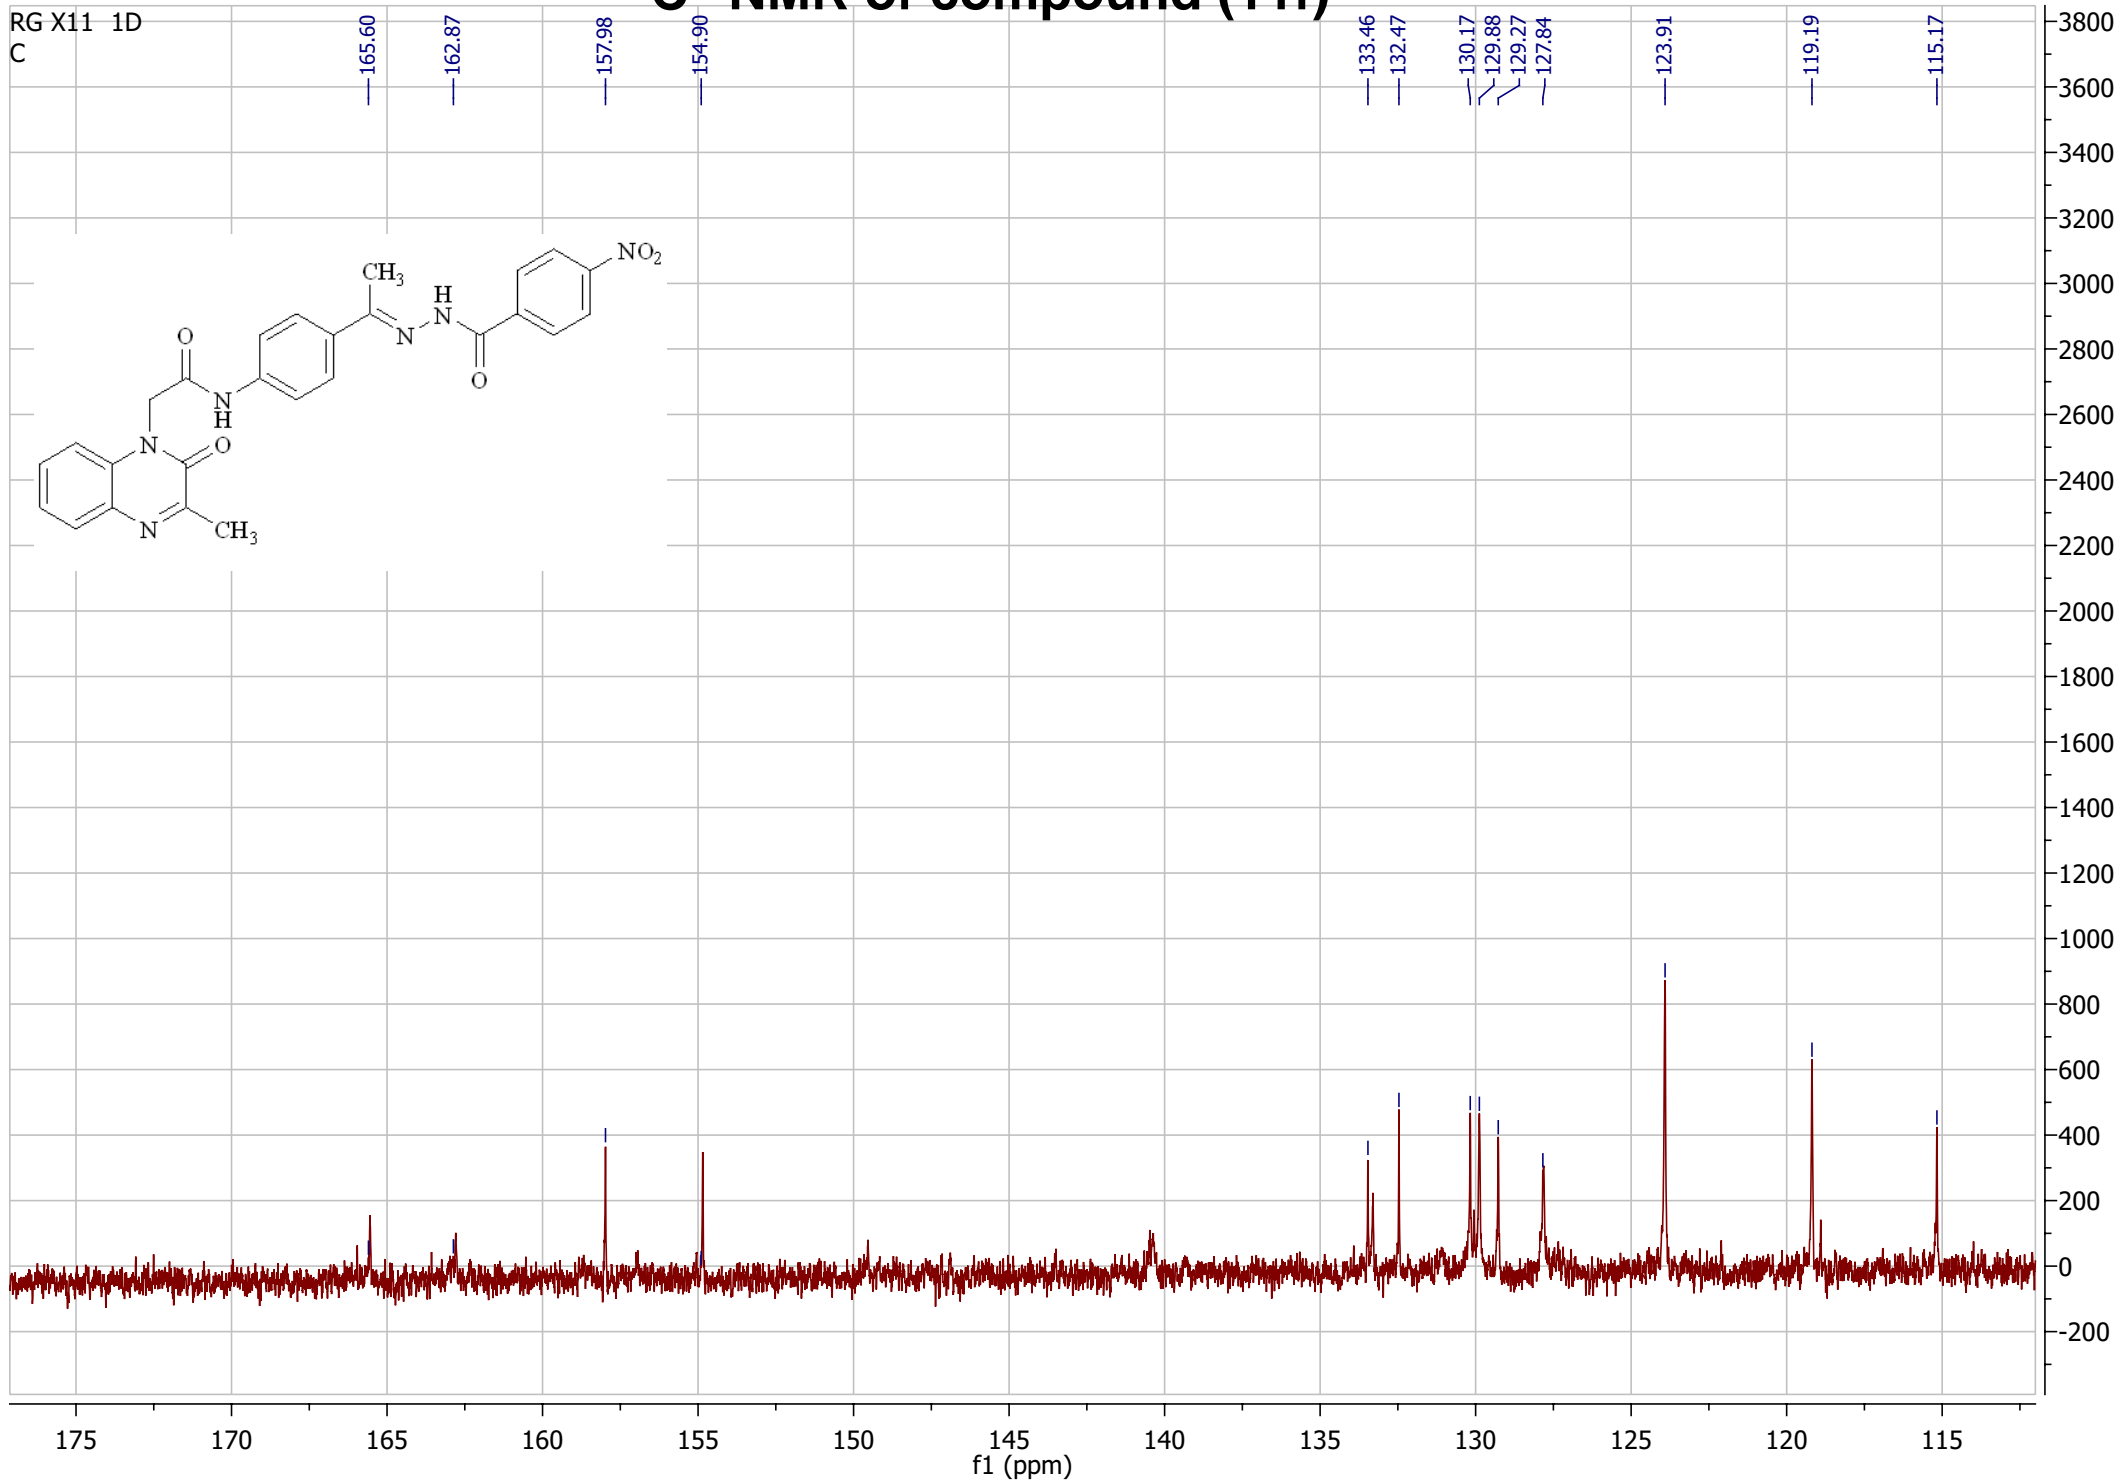

# Dept135 NMR of compound (11f)

RG X11 1D  
DEPT135

130.17  
129.87  
129.27  
127.82  
123.91

119.18  
118.90  
115.17

45.87

27.00

21.71

15.13

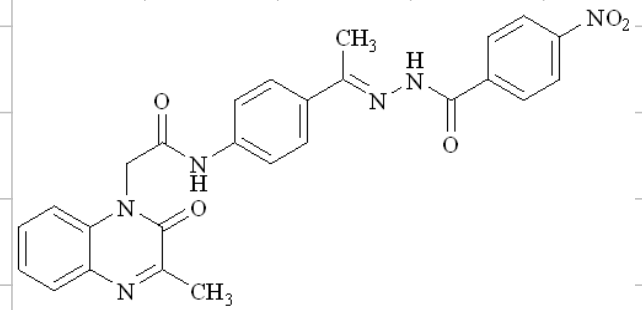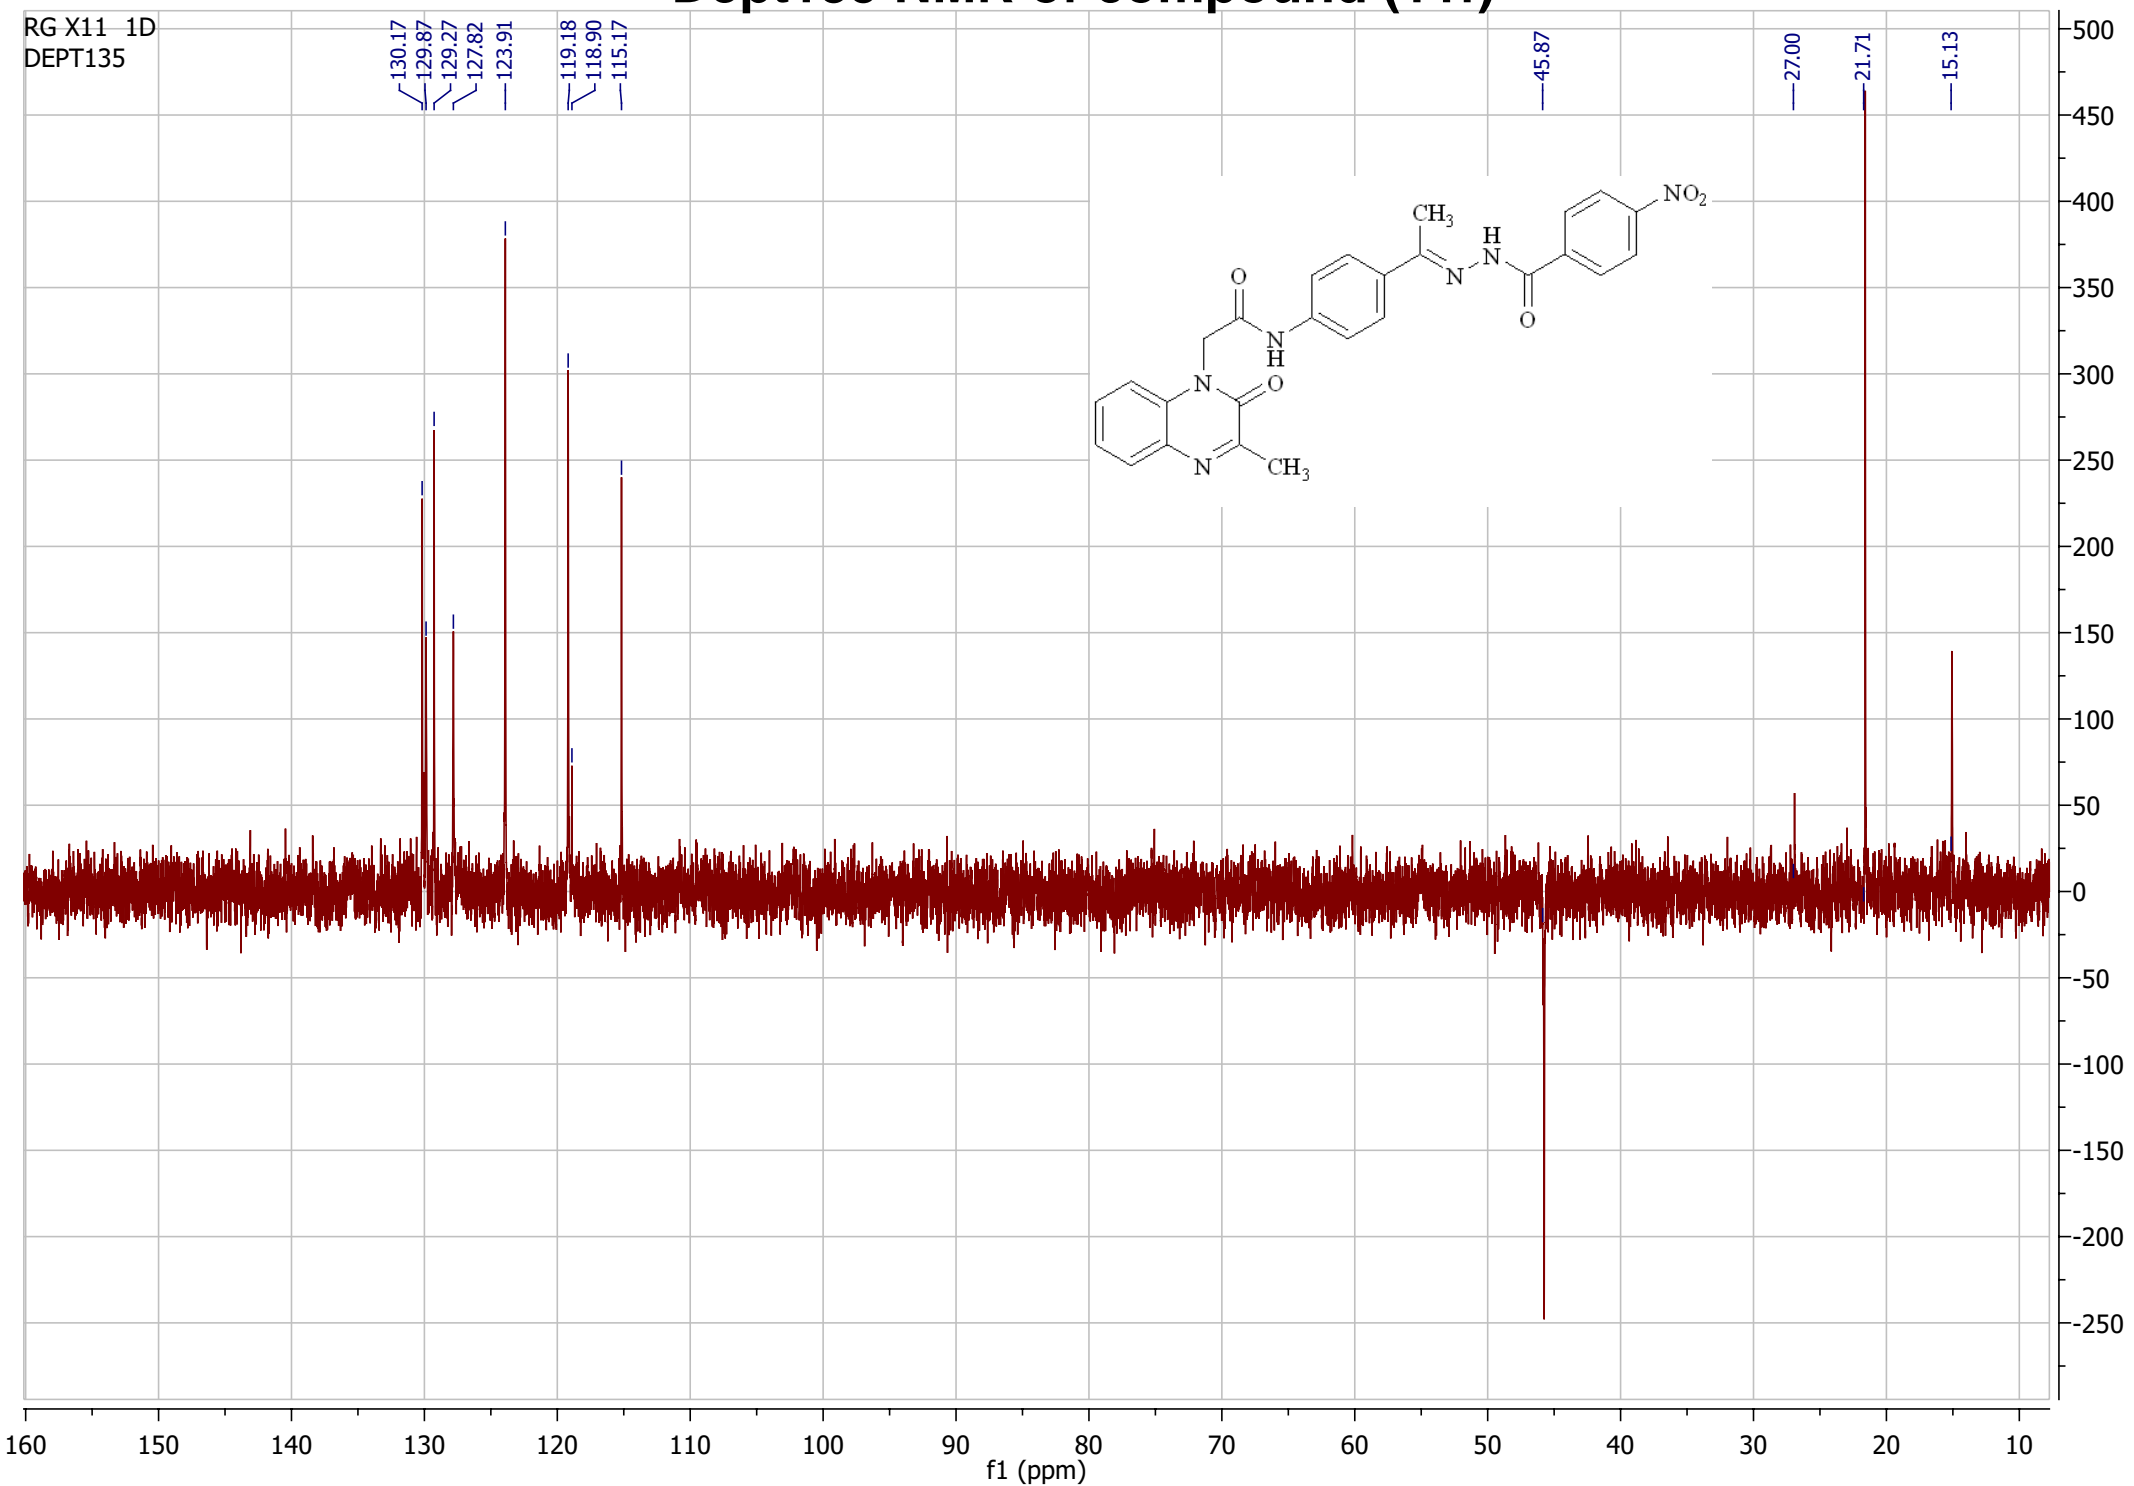

# Dept135 NMR of compound (11f)

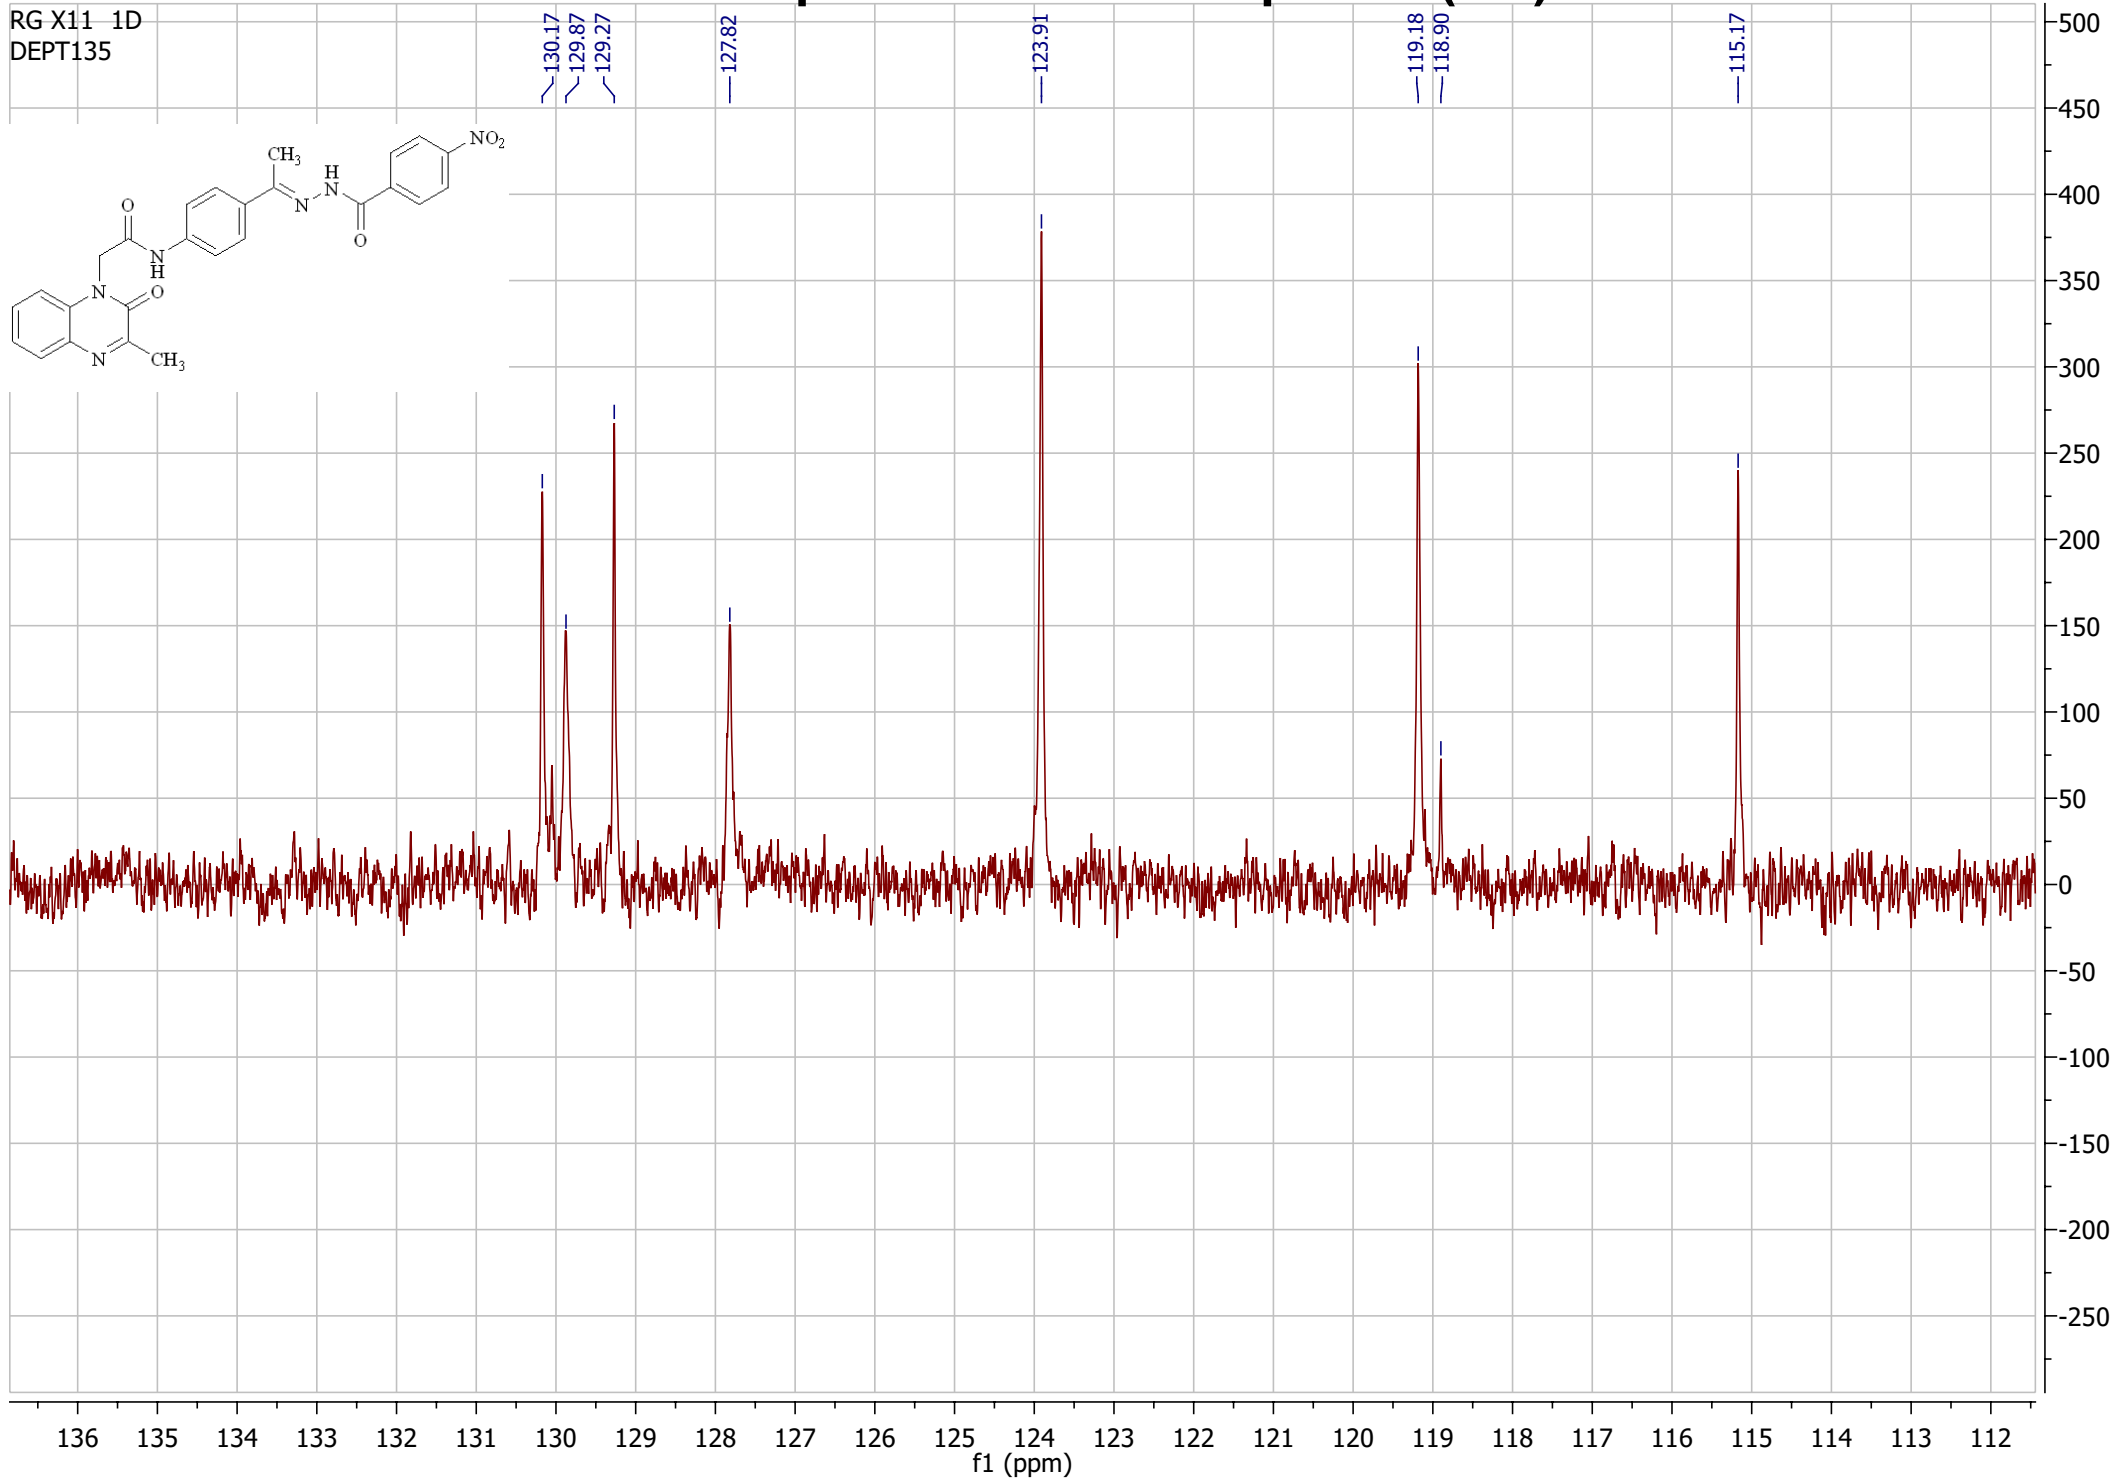



IR of compound 11g

SHIMADZU

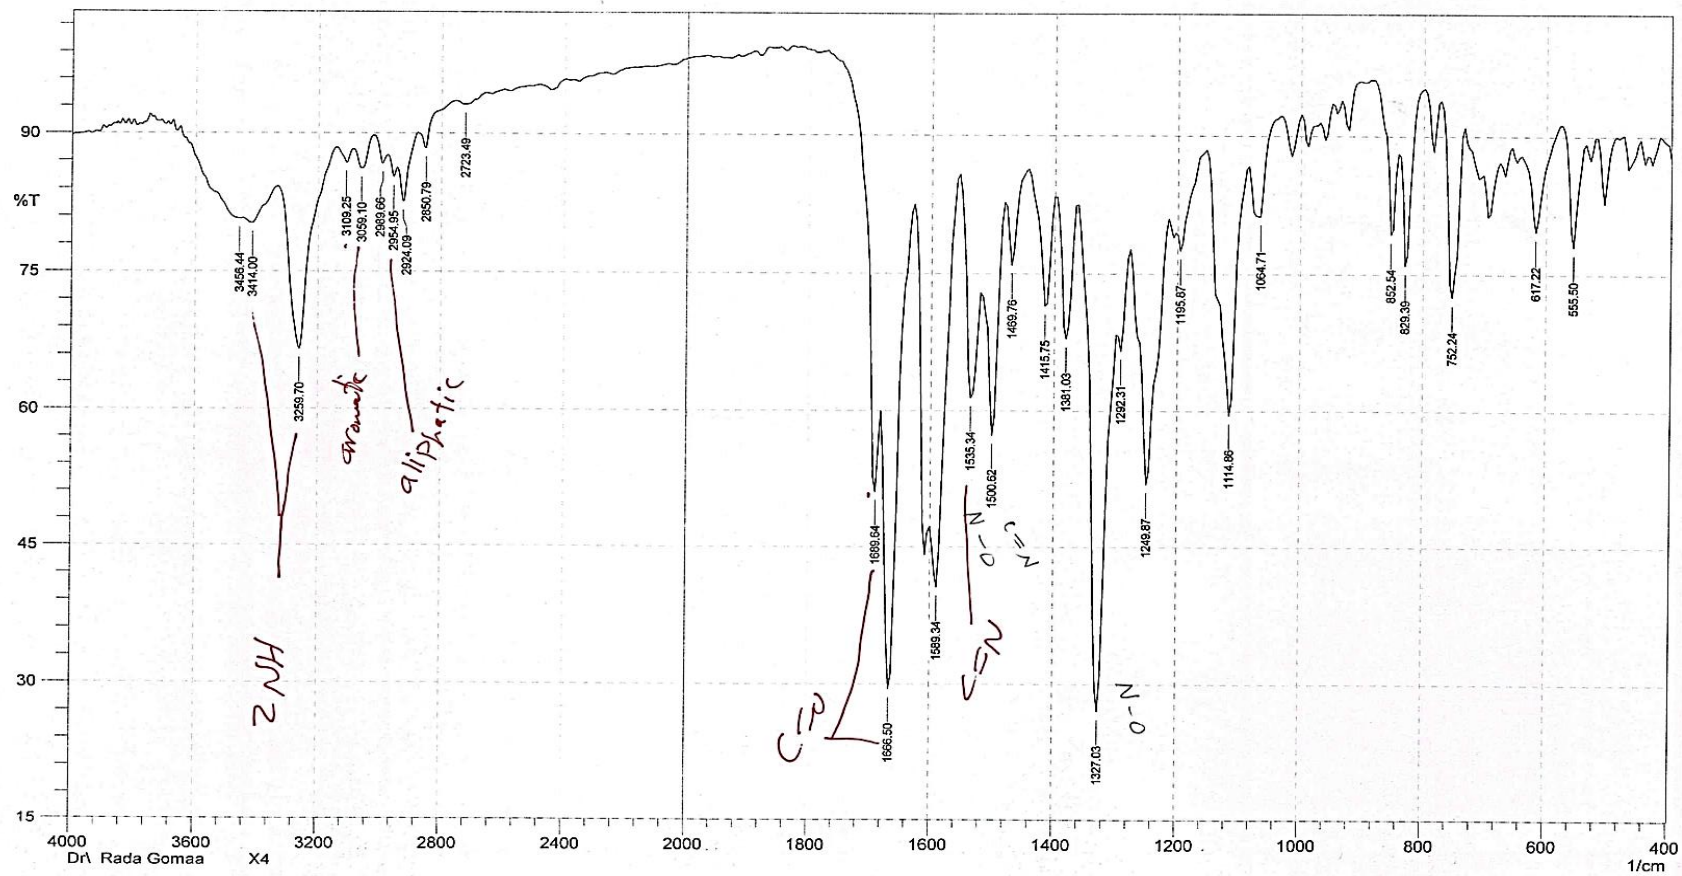

Comment;

Dr\ Rada Gomaa X4

No. of Scans; 8

Resolution; 8 [1/cm]

Date/Time; 11/11/2018 11:34:29 AM

User; usama

H<sup>1</sup>NMR of compound (11g)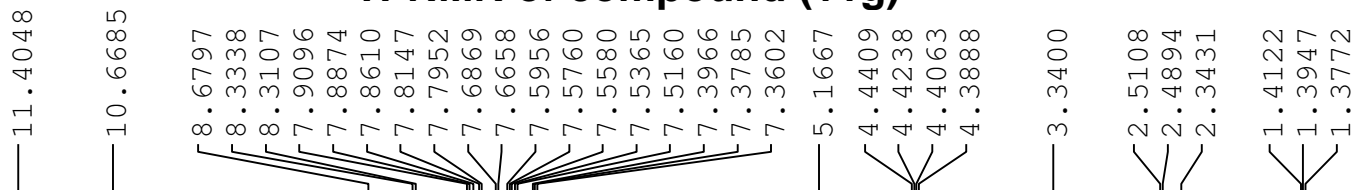

Current Data Parameters  
NAME Reda ElSaid\_H\_X4  
EXPNO 10  
PROCNO 1

F2 - Acquisition Parameters  
Date\_ 20171024  
Time 11.17  
INSTRUM spect  
PROBHD 5 mm PABBO BB/  
PULPROG zg30  
TD 65536  
SOLVENT DMSO  
NS 32  
DS 2  
SWH 8012.820 Hz  
FIDRES 0.122266 Hz  
AQ 4.0894465 sec  
RG 169.46  
DW 62.400 usec  
DE 6.50 usec  
TE 298.1 K  
D1 1.0000000 sec  
TD0 1

===== CHANNEL f1 =====  
SFO1 400.1924713 MHz  
NUC1 1H  
P1 15.00 usec  
PLW1 10.39999962 W

F2 - Processing parameters  
SI 65536  
SF 400.1900000 MHz  
WDW EM  
SSB 0  
LB 0.30 Hz  
GB 0  
PC 1.00

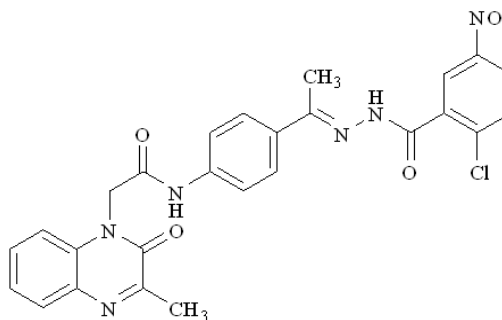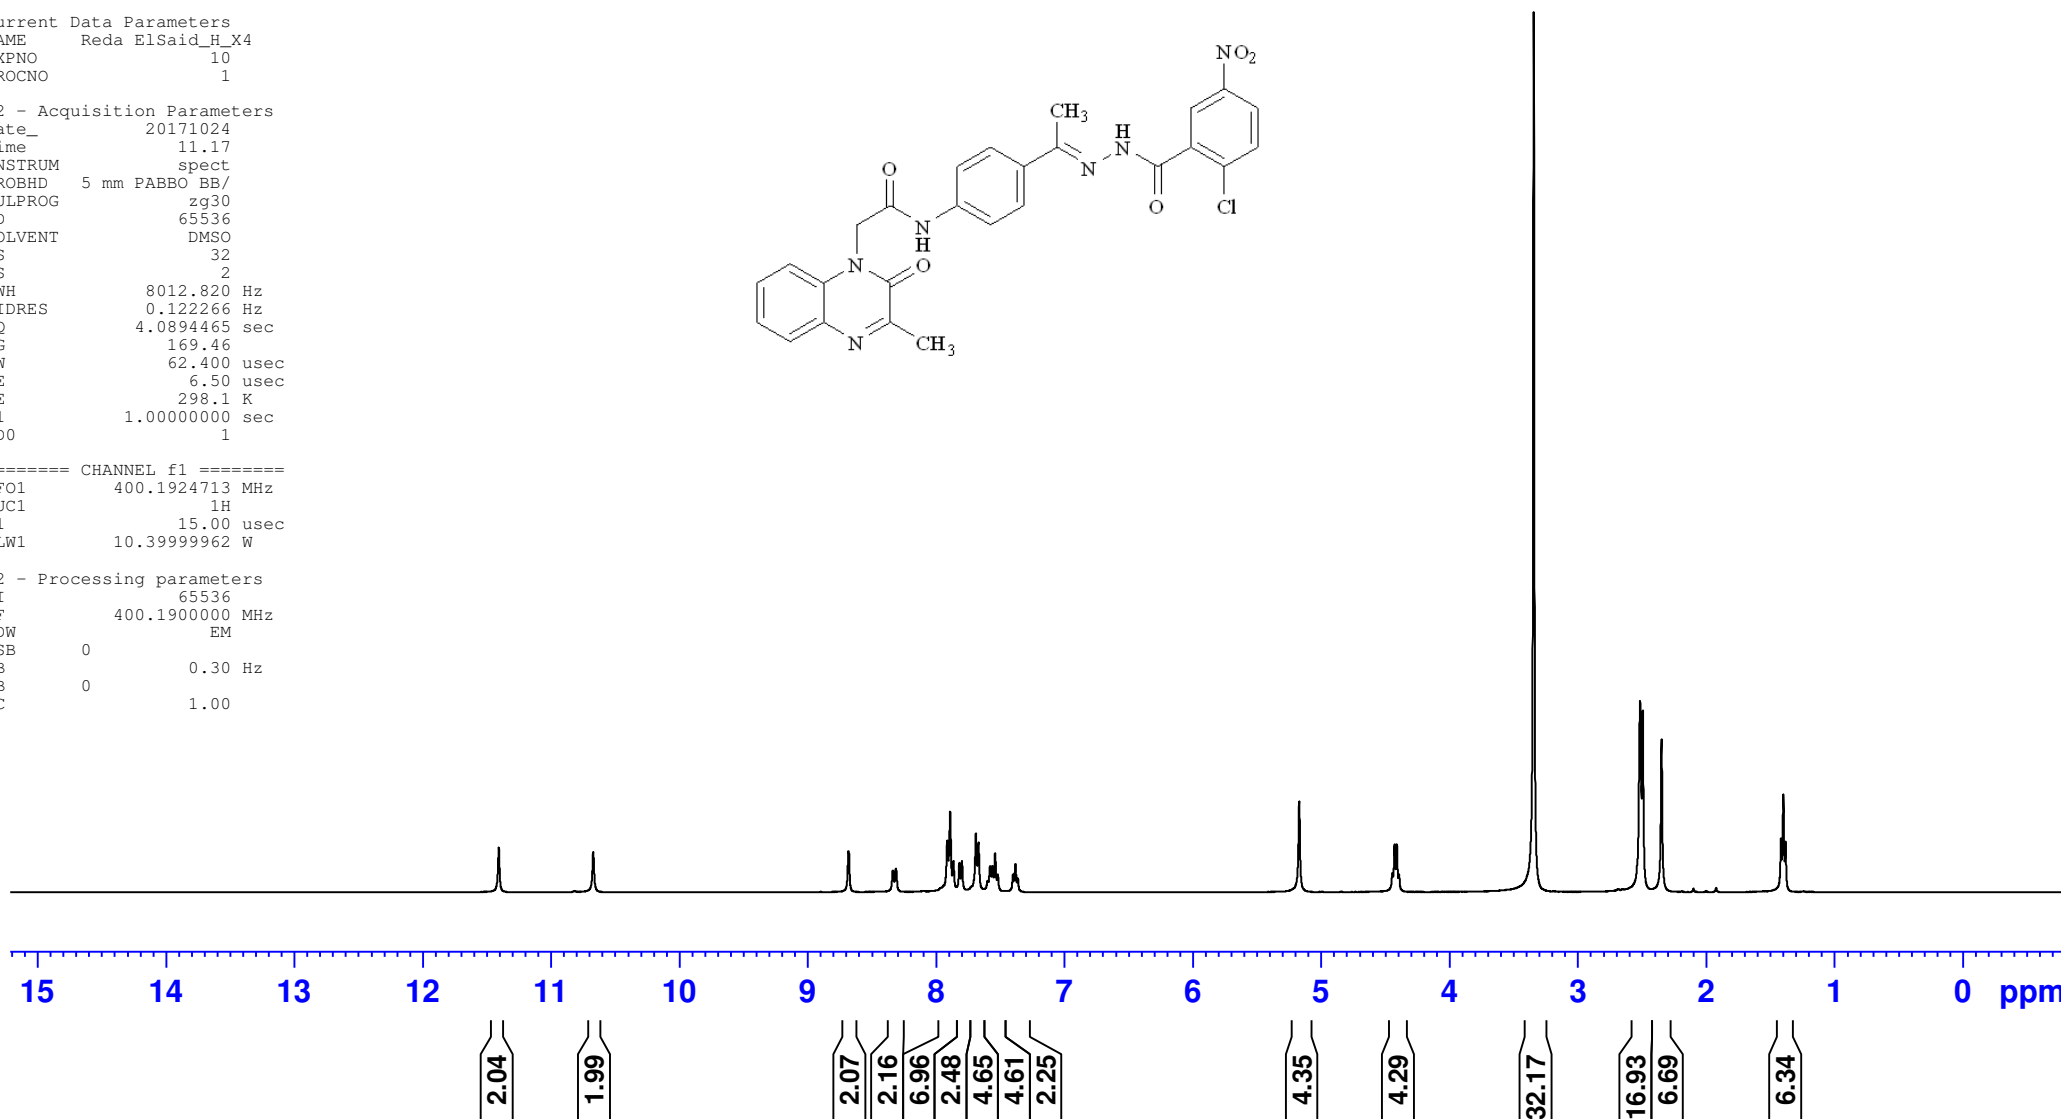

H<sup>1</sup>NMR of compound (11g)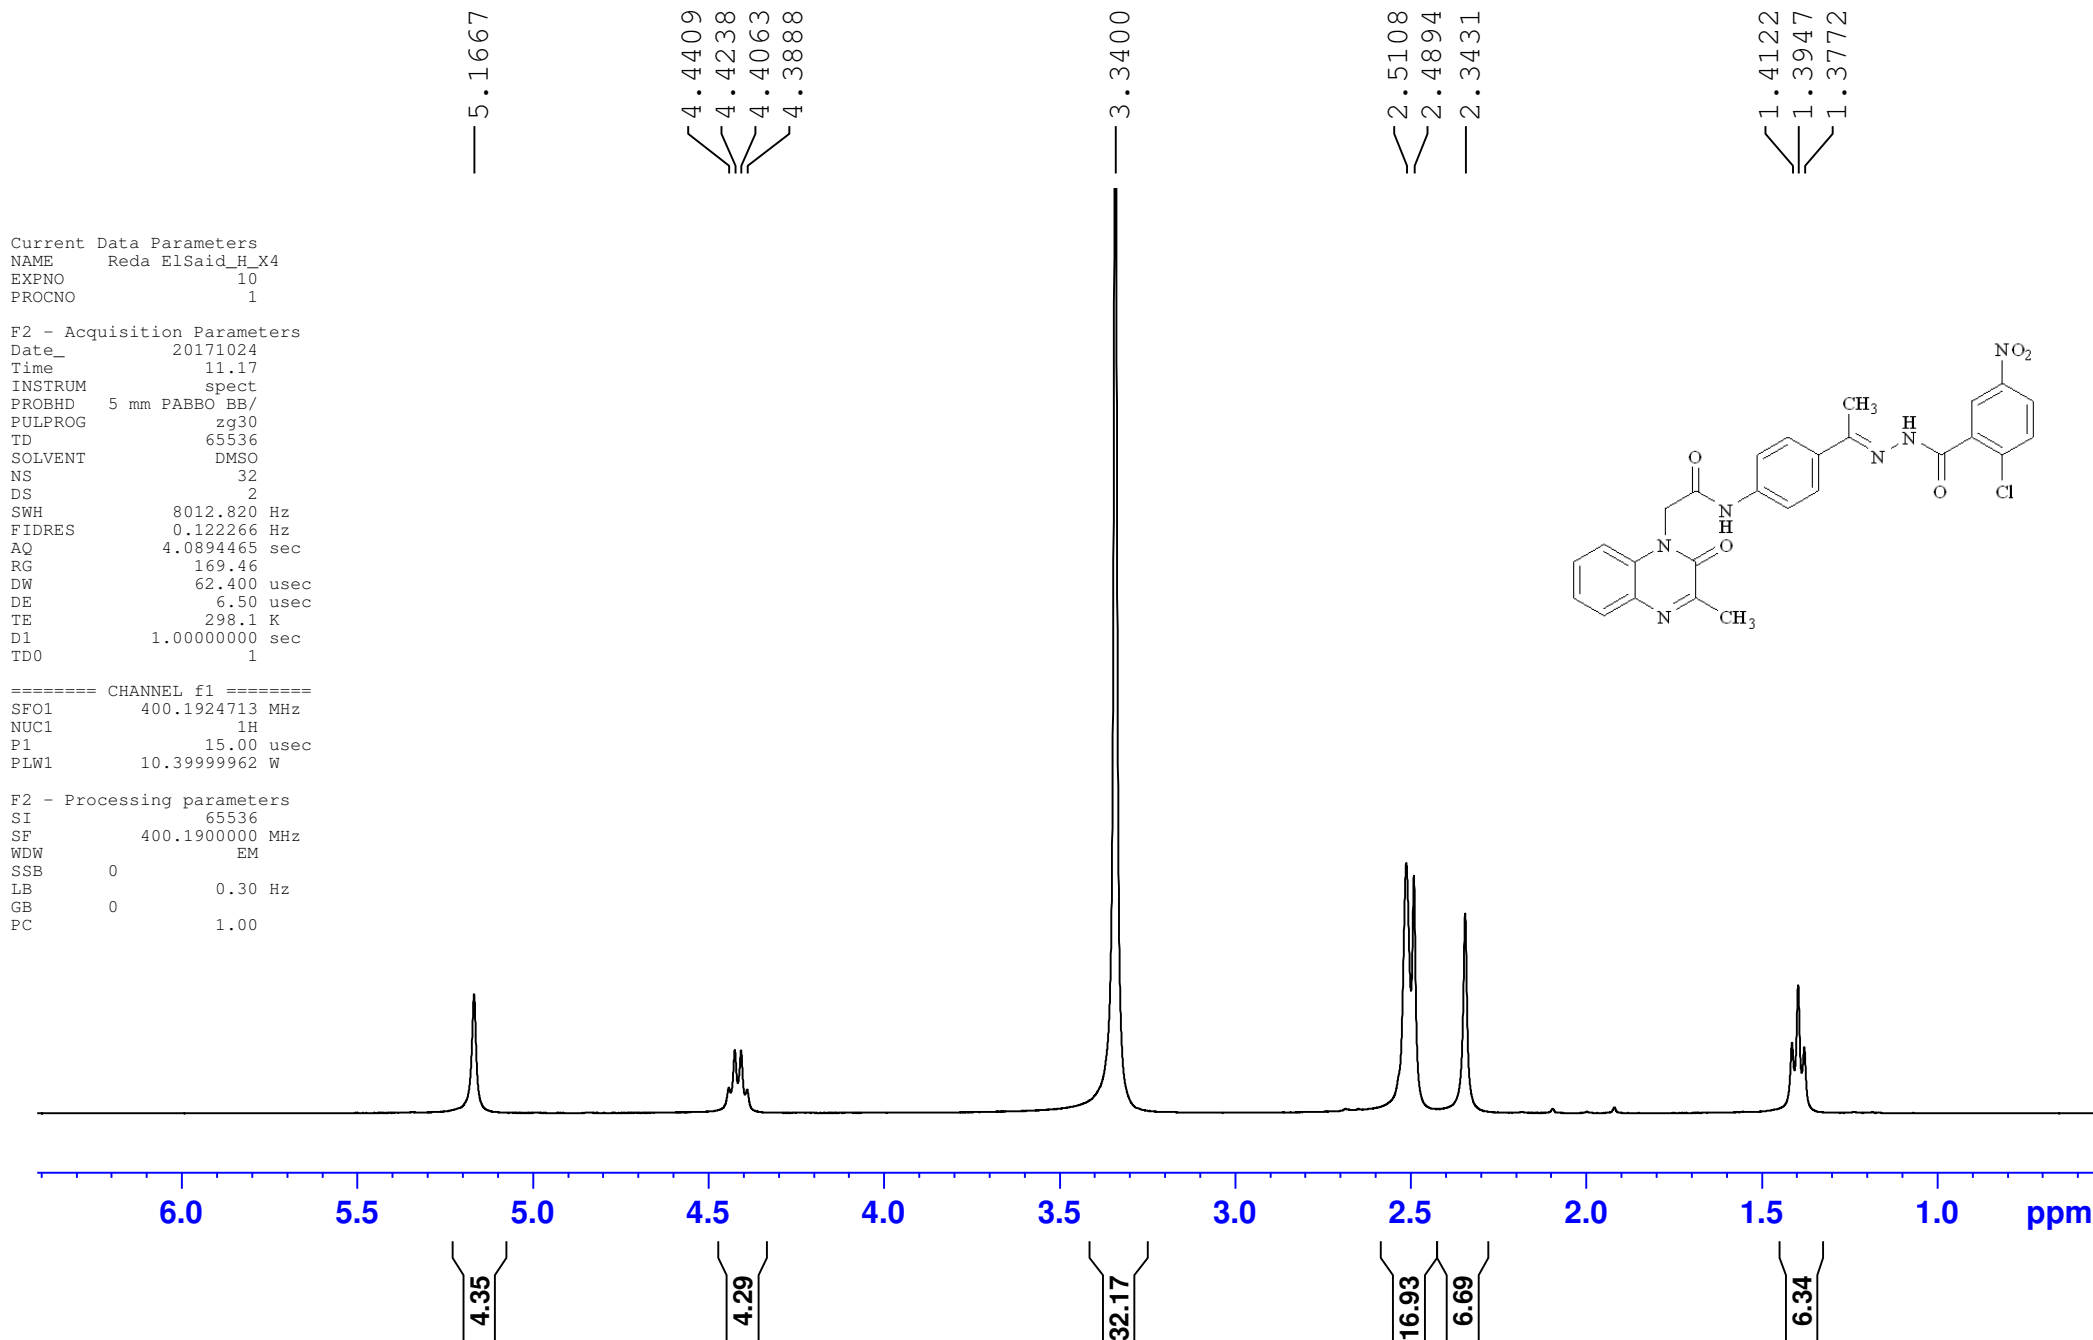

H<sup>1</sup>NMR of compound (11g)

— 11.4048

— 10.6685

— 8.6797

 8.3338  
 8.3107  
 7.9096  
 7.8874  
 7.8610  
 7.8147  
 7.7952  
 7.6869  
 7.6658  
 7.5956  
 7.5760  
 7.5580  
 7.5365  
 7.5160  
 7.3966  
 7.3785  
 7.3602

Current Data Parameters  
 NAME Reda ElSaid\_H\_X4  
 EXPNO 10  
 PROCNO 1

F2 - Acquisition Parameters  
 Date\_ 20171024  
 Time 11.17  
 INSTRUM spect  
 PROBHD 5 mm PABBO BB/  
 PULPROG zg30  
 TD 65536  
 SOLVENT DMSO  
 NS 32  
 DS 2  
 SWH 8012.820 Hz  
 FIDRES 0.122266 Hz  
 AQ 4.0894465 sec  
 RG 169.46  
 DW 62.400 usec  
 DE 6.50 usec  
 TE 298.1 K  
 D1 1.0000000 sec  
 TD0 1

===== CHANNEL f1 =====  
 SFO1 400.1924713 MHz  
 NUC1 1H  
 P1 15.00 usec  
 PLW1 10.39999962 W

F2 - Processing parameters  
 SI 65536  
 SF 400.1900000 MHz  
 WDW EM  
 SSB 0  
 LB 0.30 Hz  
 GB 0  
 PC 1.00

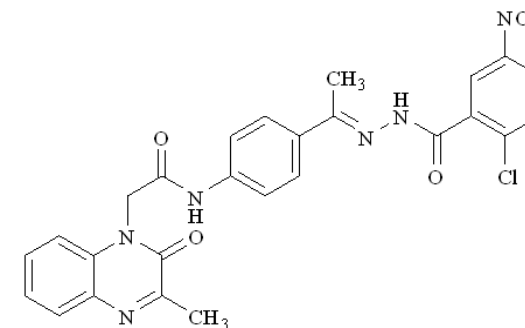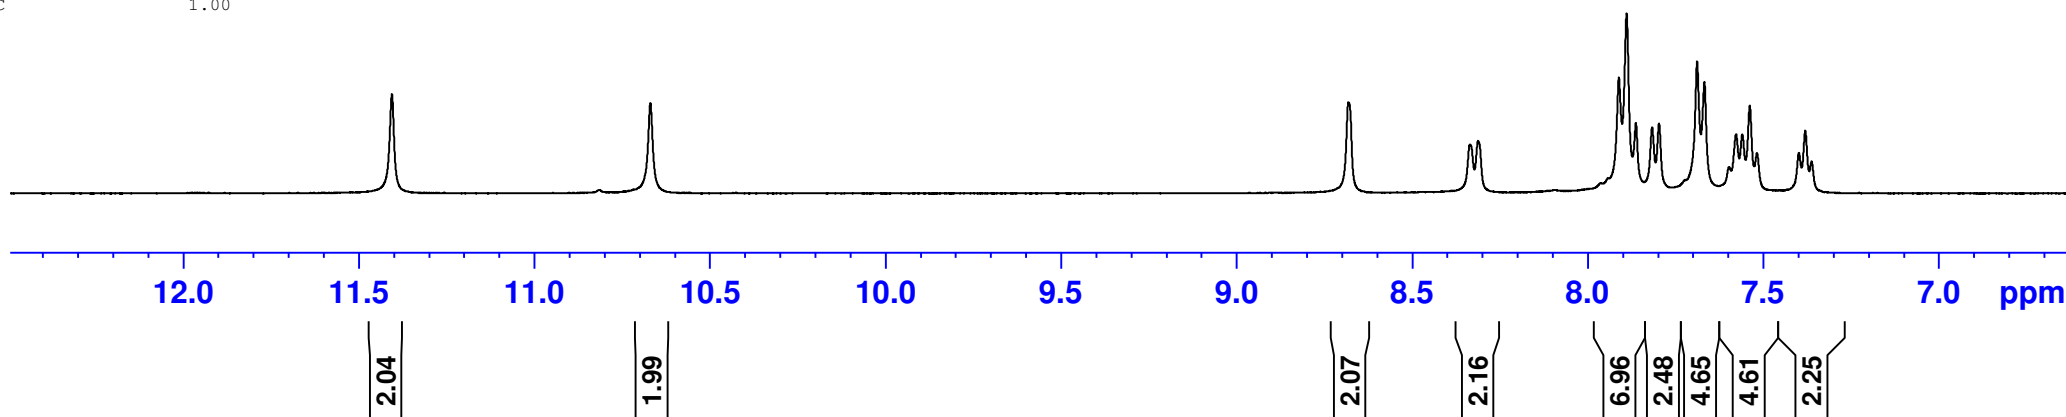

Mass spec. of compound 11g

reda-alsyed-gomaa-rg-x4 #287 RT: 4.82 AV: 1 NL: 1.25E3  
T: {0,0} + c EI Full ms [40.00-1000.00]

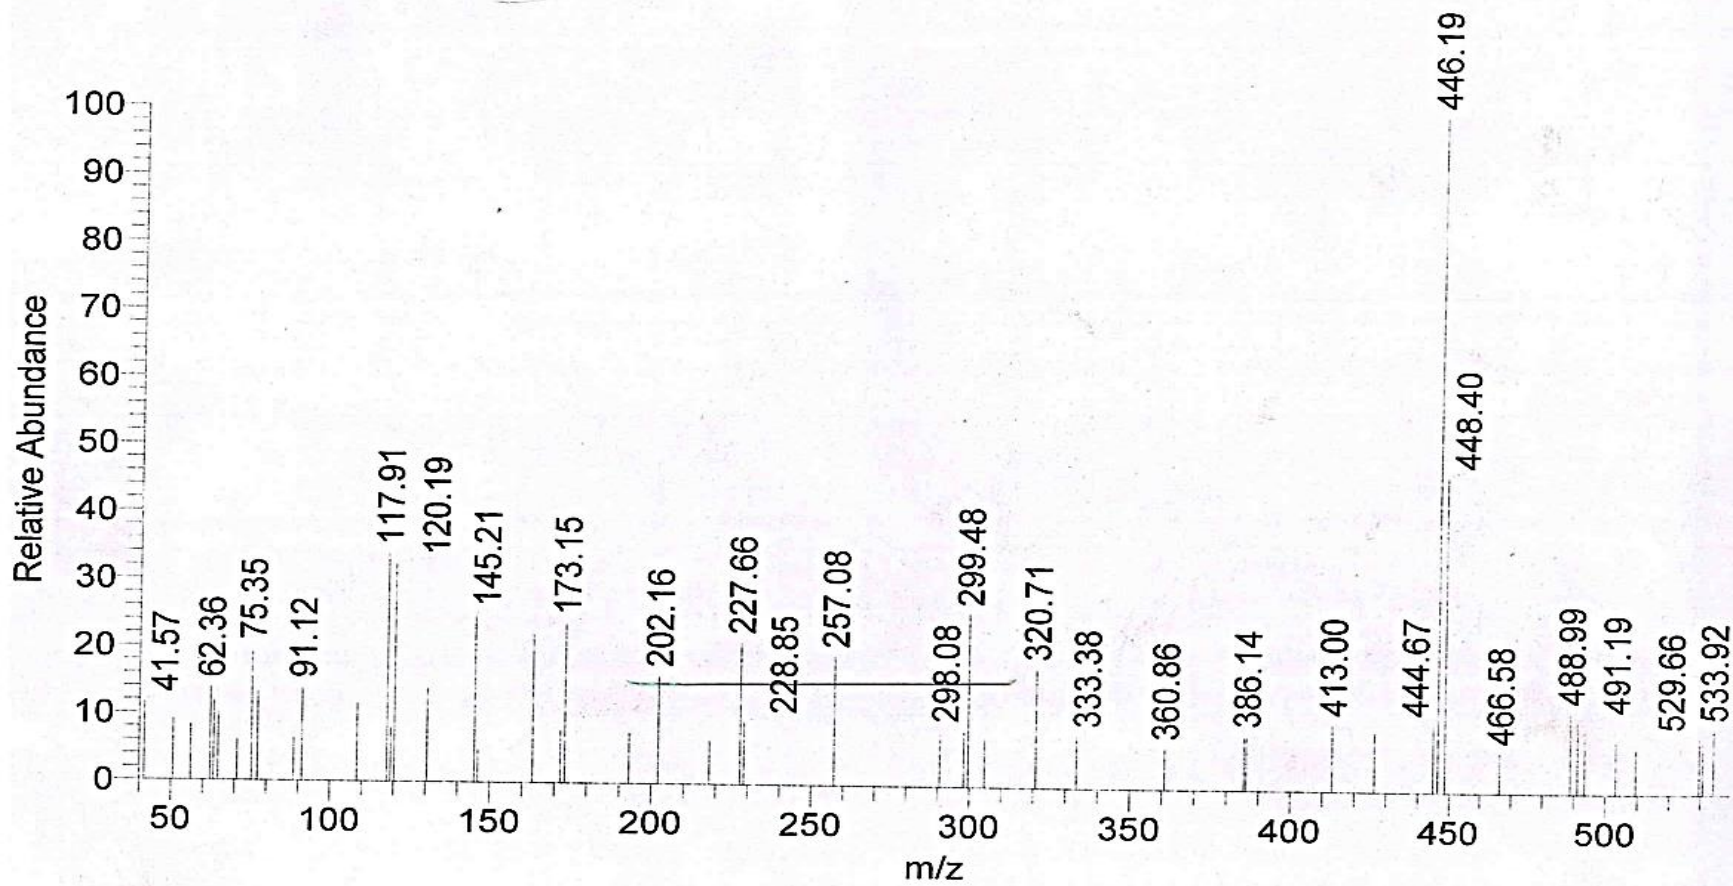

IR of compound 12

SHIMADZU

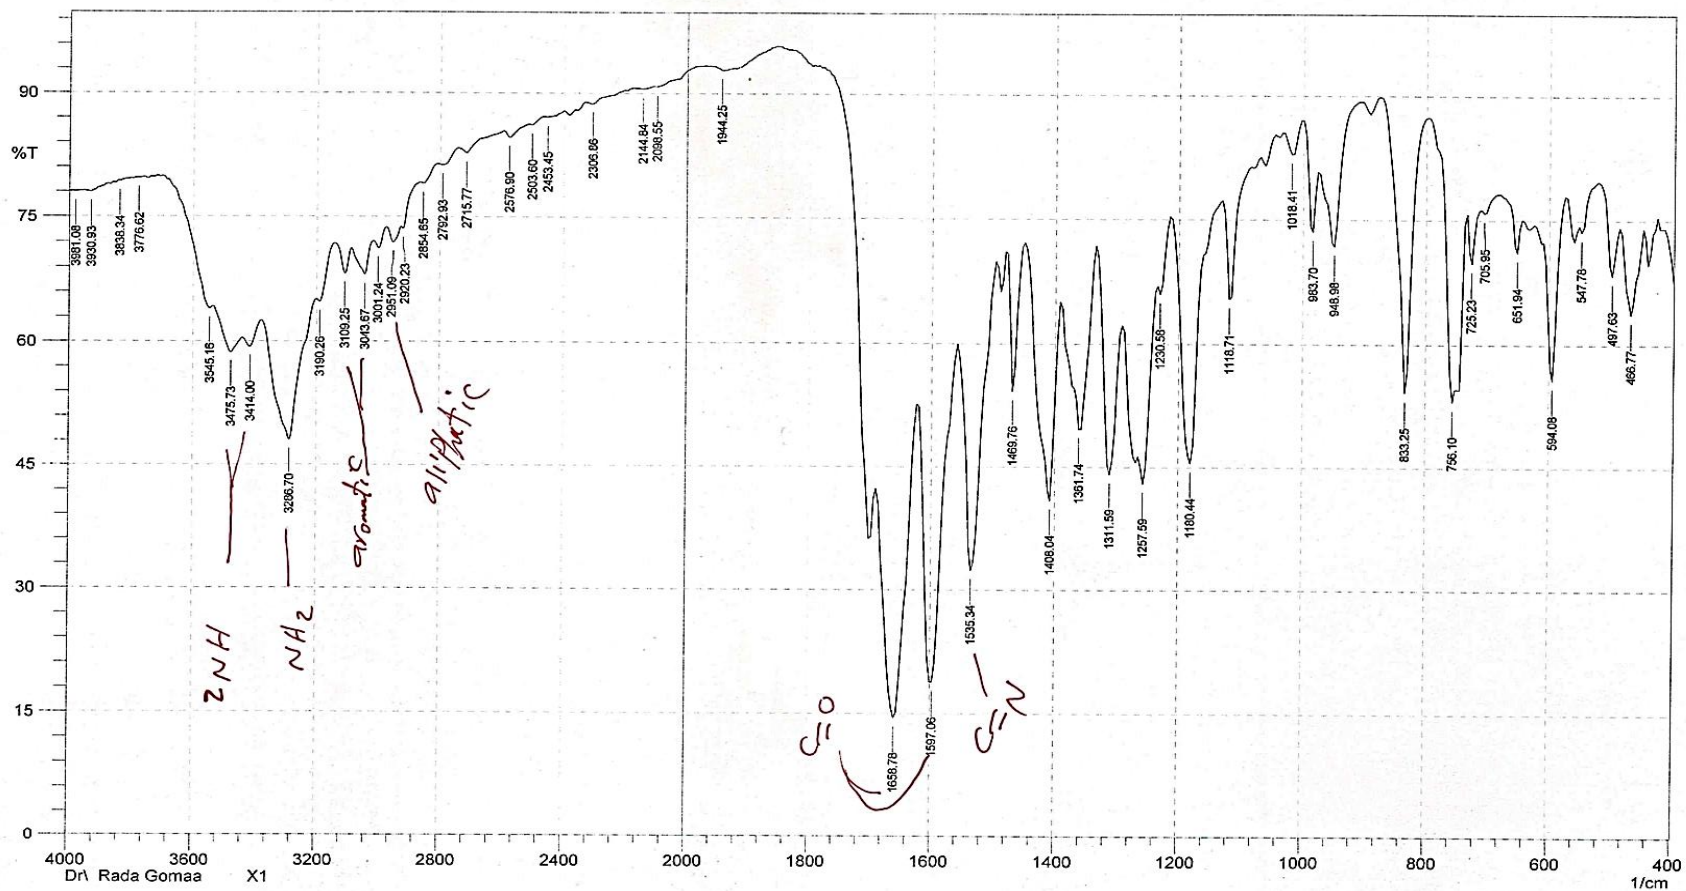

Comment;

Dr Rada Gomaa X1

No. of Scans; 8

Resolution; 8 [1/cm]

Date/Time; 11/11/2018 11:38:35 AM

User; usama

# $^1\text{H}$ NMR of compound (12)

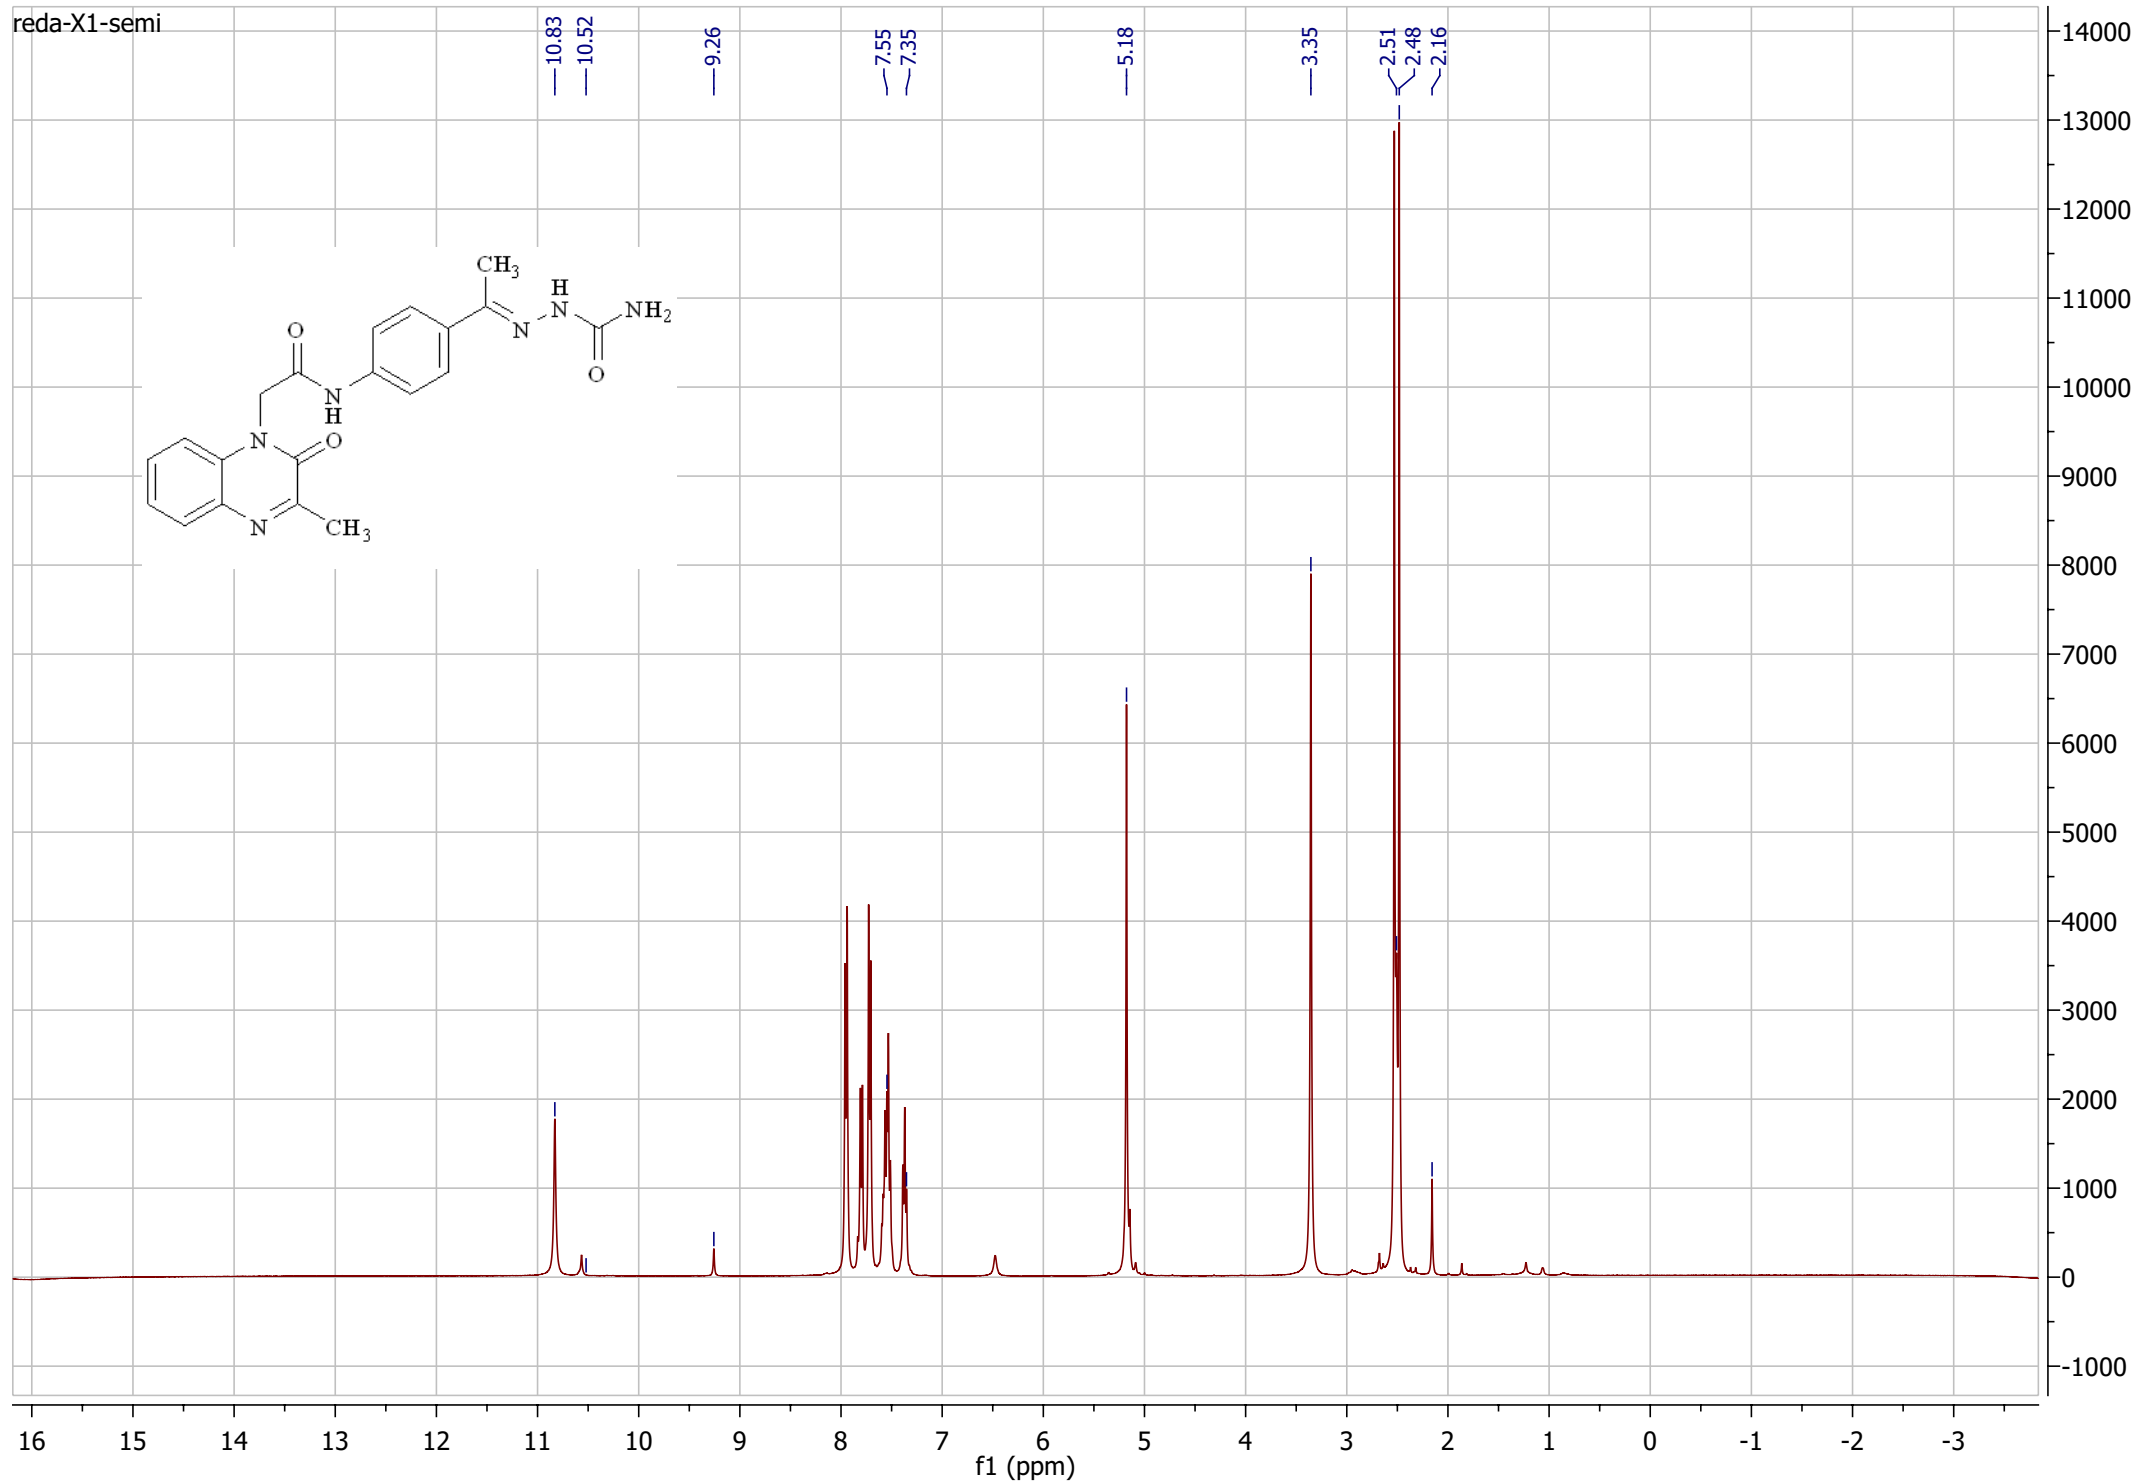

IR of compound 13

SHIMADZU

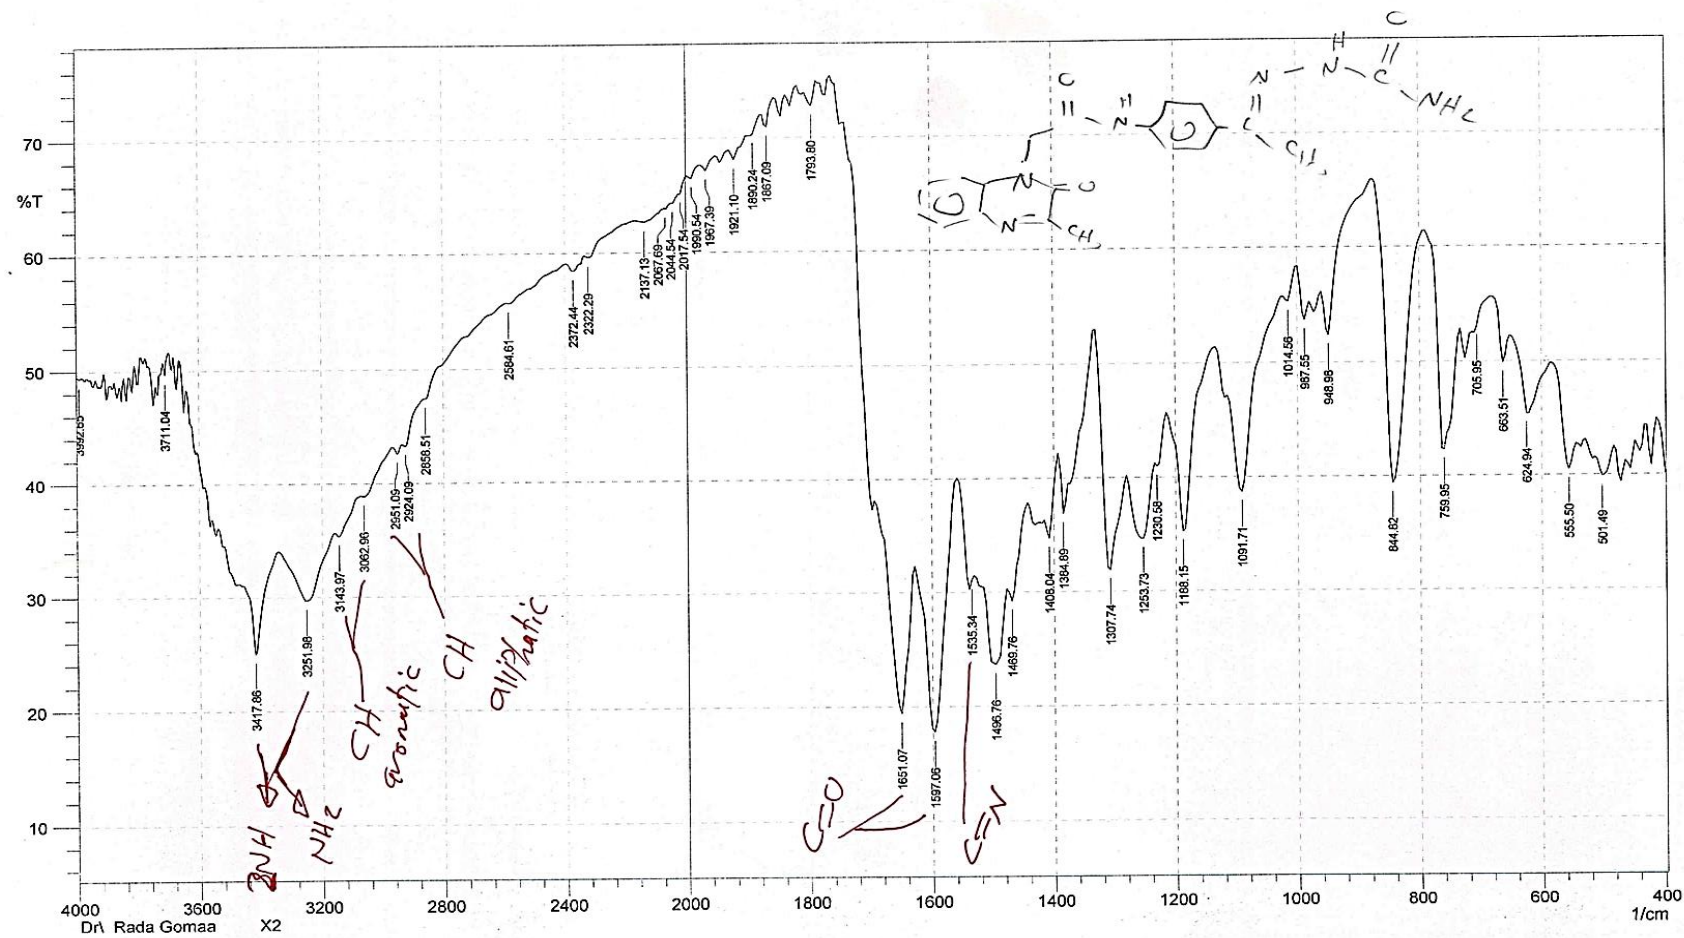

Comment; Dr Rada Gomaa X2

No. of Scans; 8  
Resolution; 8 [1/cm]

Date/Time; 11/11/2018 11:04:52 AM  
User; usama



# H<sup>1</sup>NMR of compound (13)

GR X2 1D  
H

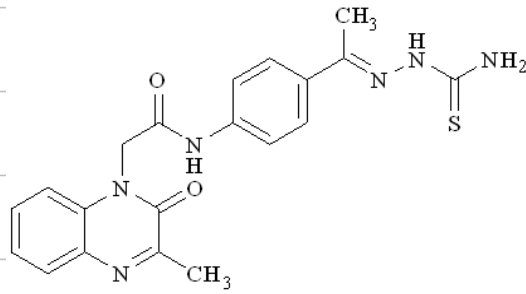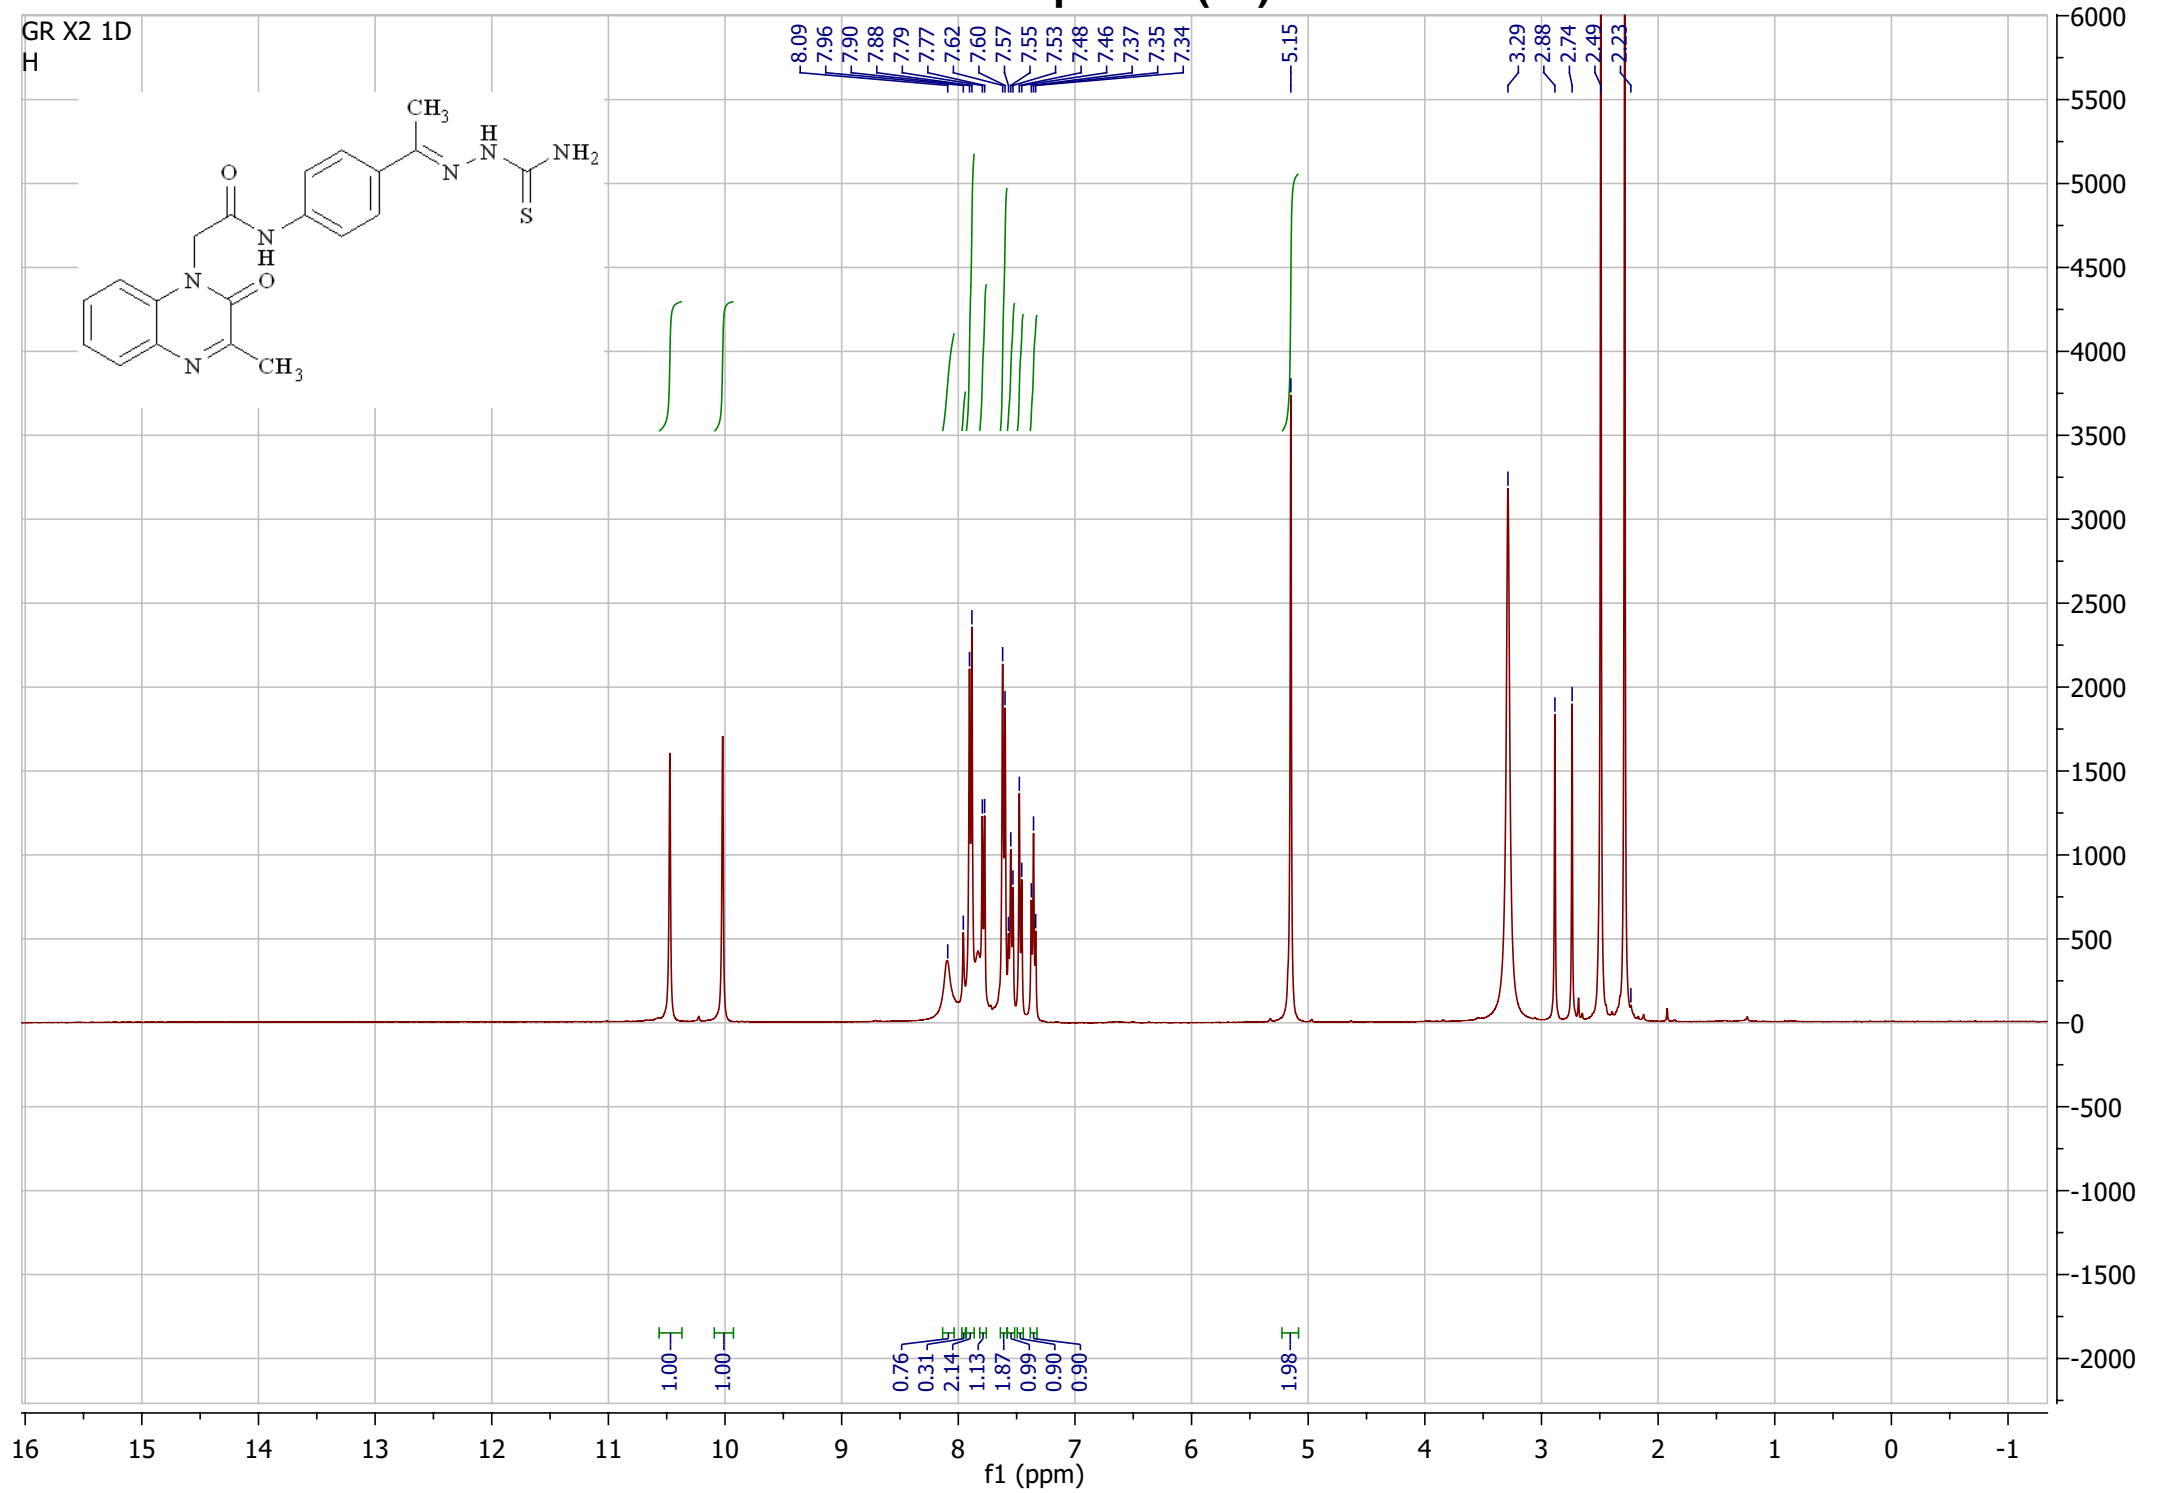

# H<sup>1</sup>NMR of compound (13)

GR X2 1D

H

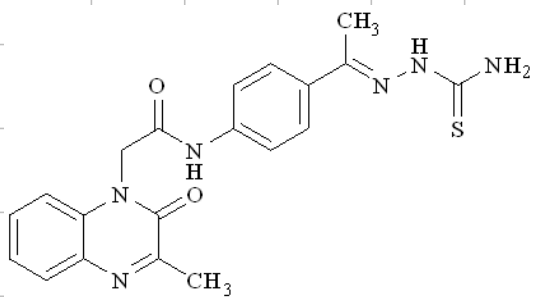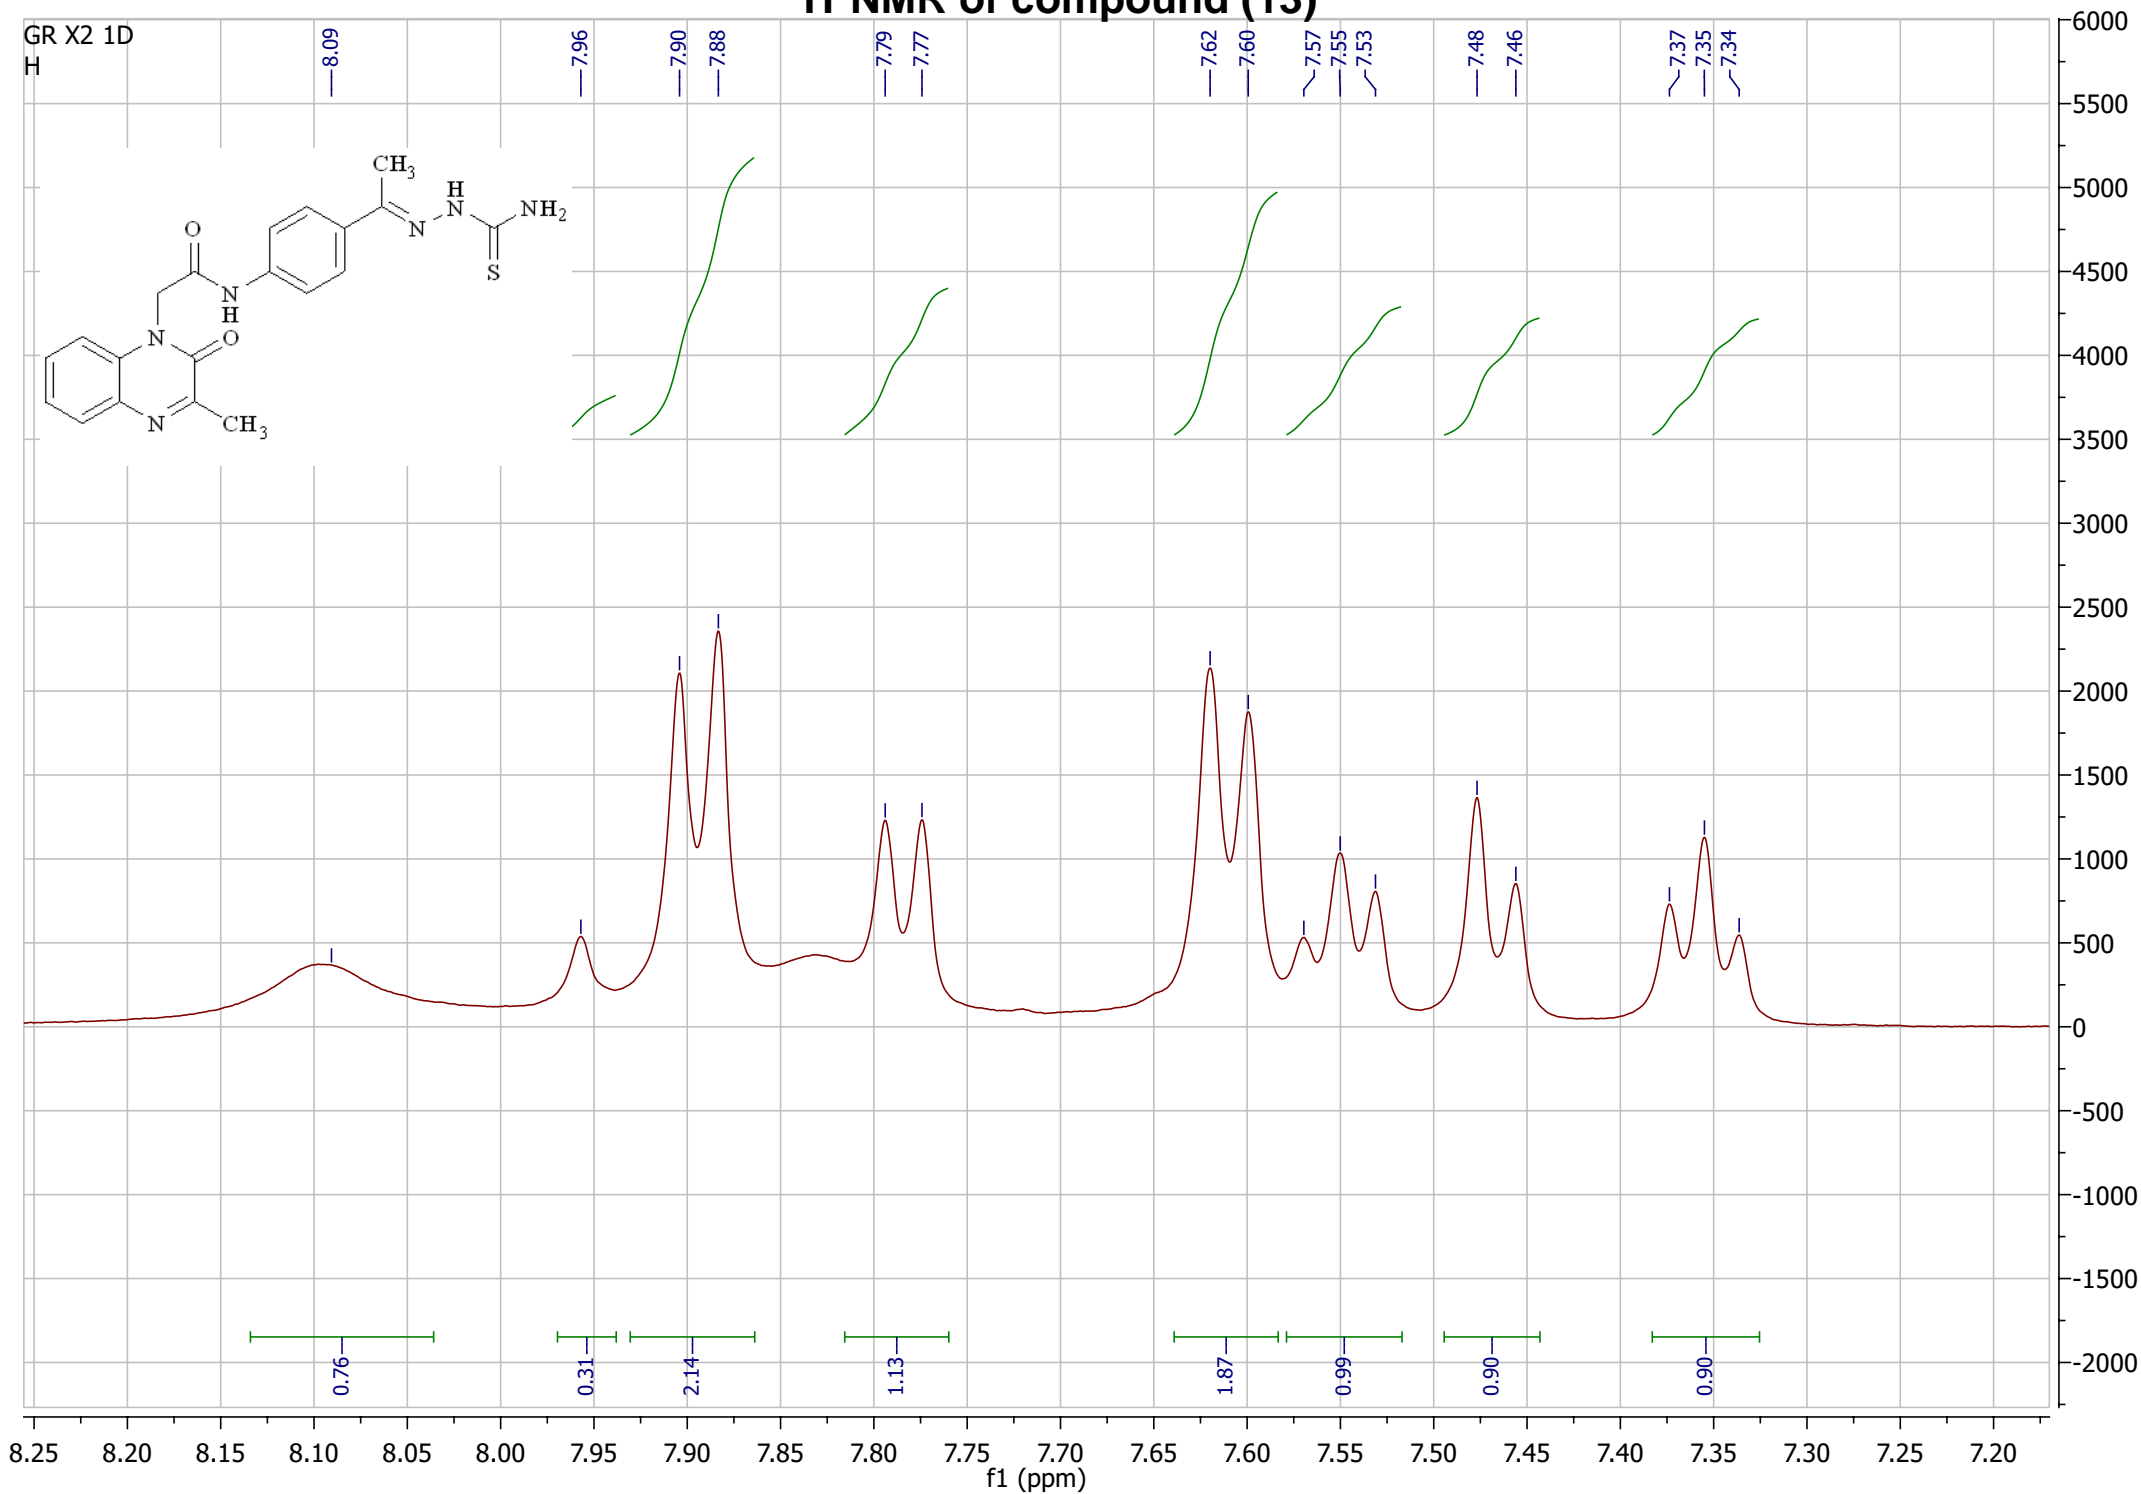

# H<sup>1</sup>NMR of compound (14)

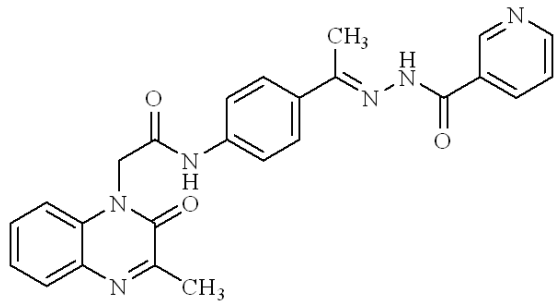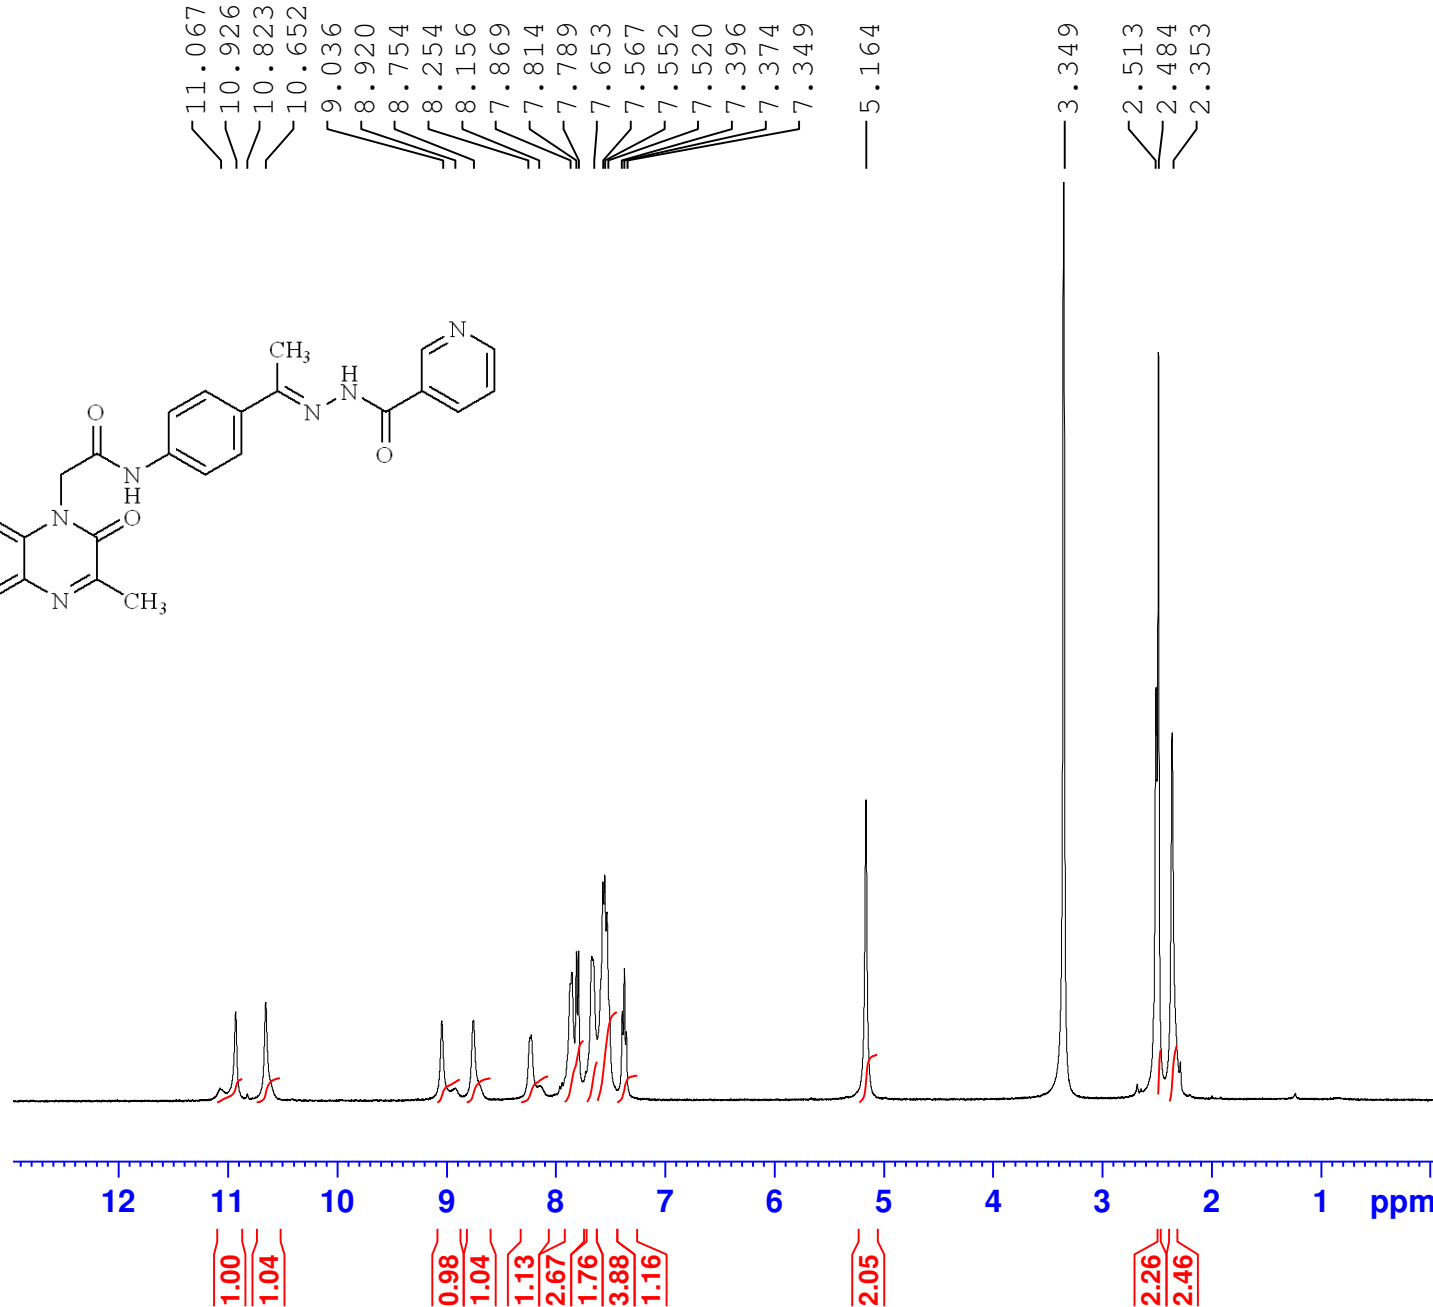

Current Data Parameters  
 NAME reda-X10  
 EXPNO 1  
 PROCNO 1

F2 - Acquisition Parameters  
 Date\_ 20180423  
 Time 9.21  
 INSTRUM spect  
 PROBHD 5 mm PABBO BB/  
 PULPROG zg30  
 TD 65536  
 SOLVENT DMSO  
 NS 35  
 DS 2  
 SWH 8012.820 Hz  
 FIDRES 0.122266 Hz  
 AQ 4.0894465 sec  
 RG 205.37  
 DW 62.400 usec  
 DE 6.50 usec  
 TE 298.4 K  
 D1 1.00000000 sec  
 TD0 1

===== CHANNEL f1 =====  
 SFO1 400.1524711 MHz  
 NUC1 1H  
 P1 12.00 usec  
 PLW1 18.00000000 W

F2 - Processing parameters  
 SI 65536  
 SF 400.1500000 MHz  
 WDW EM  
 SSB 0  
 LB 0.30 Hz  
 GB 0  
 PC 1.00

IR of compound 14

SHIMADZU

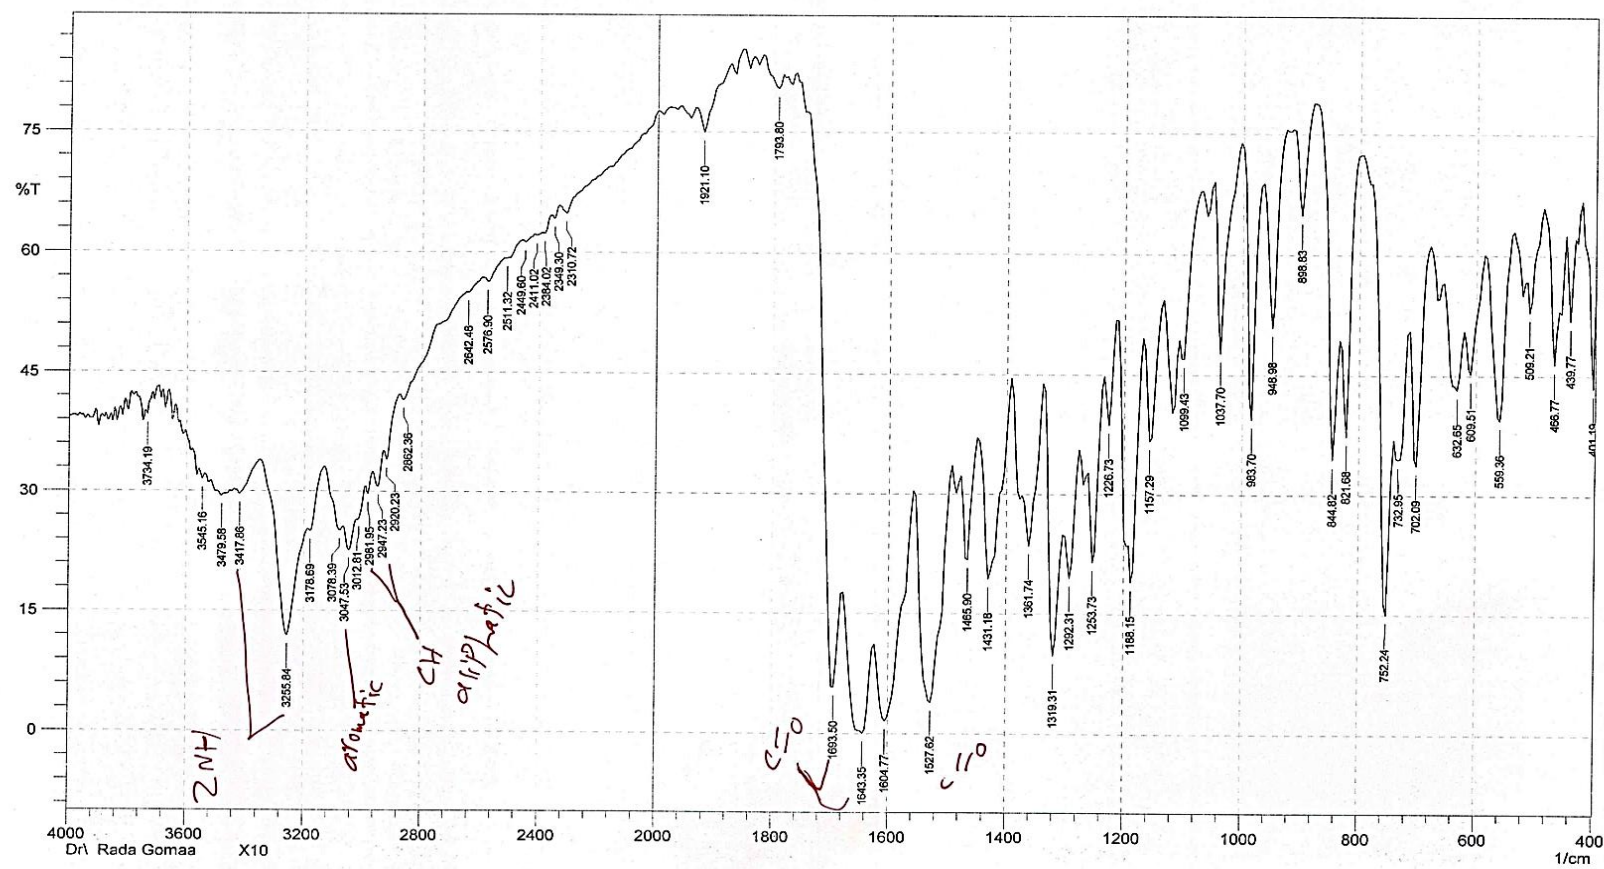

Comment;

Dr Rada Goma X10

No. of Scans; 8

Resolution; 8 [1/cm]

Date/Time; 11/11/2018 11:25:37.AM

User; usama

# H<sup>1</sup>NMR of compound (14)

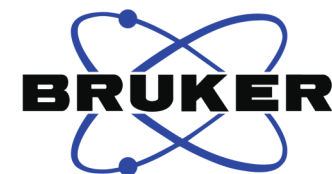

Current Data Parameters  
NAME reda-X10  
EXPNO 1  
PROCNO 1

F2 - Acquisition Parameters  
Date\_ 20180423  
Time 9.21  
INSTRUM spect  
PROBHD 5 mm PABBO BB/  
PULPROG zg30  
TD 65536  
SOLVENT DMSO  
NS 35  
DS 2  
SWH 8012.820 Hz  
FIDRES 0.122266 Hz  
AQ 4.0894465 sec  
RG 205.37  
DW 62.400 usec  
DE 6.50 usec  
TE 298.4 K  
D1 1.00000000 sec  
TD0 1

===== CHANNEL f1 =====  
SFO1 400.1524711 MHz  
NUC1 1H  
P1 12.00 usec  
PLW1 18.00000000 W

F2 - Processing parameters  
SI 65536  
SF 400.1500000 MHz  
WDW EM  
SSB 0  
LB 0.30 Hz  
GB 0  
PC 1.00

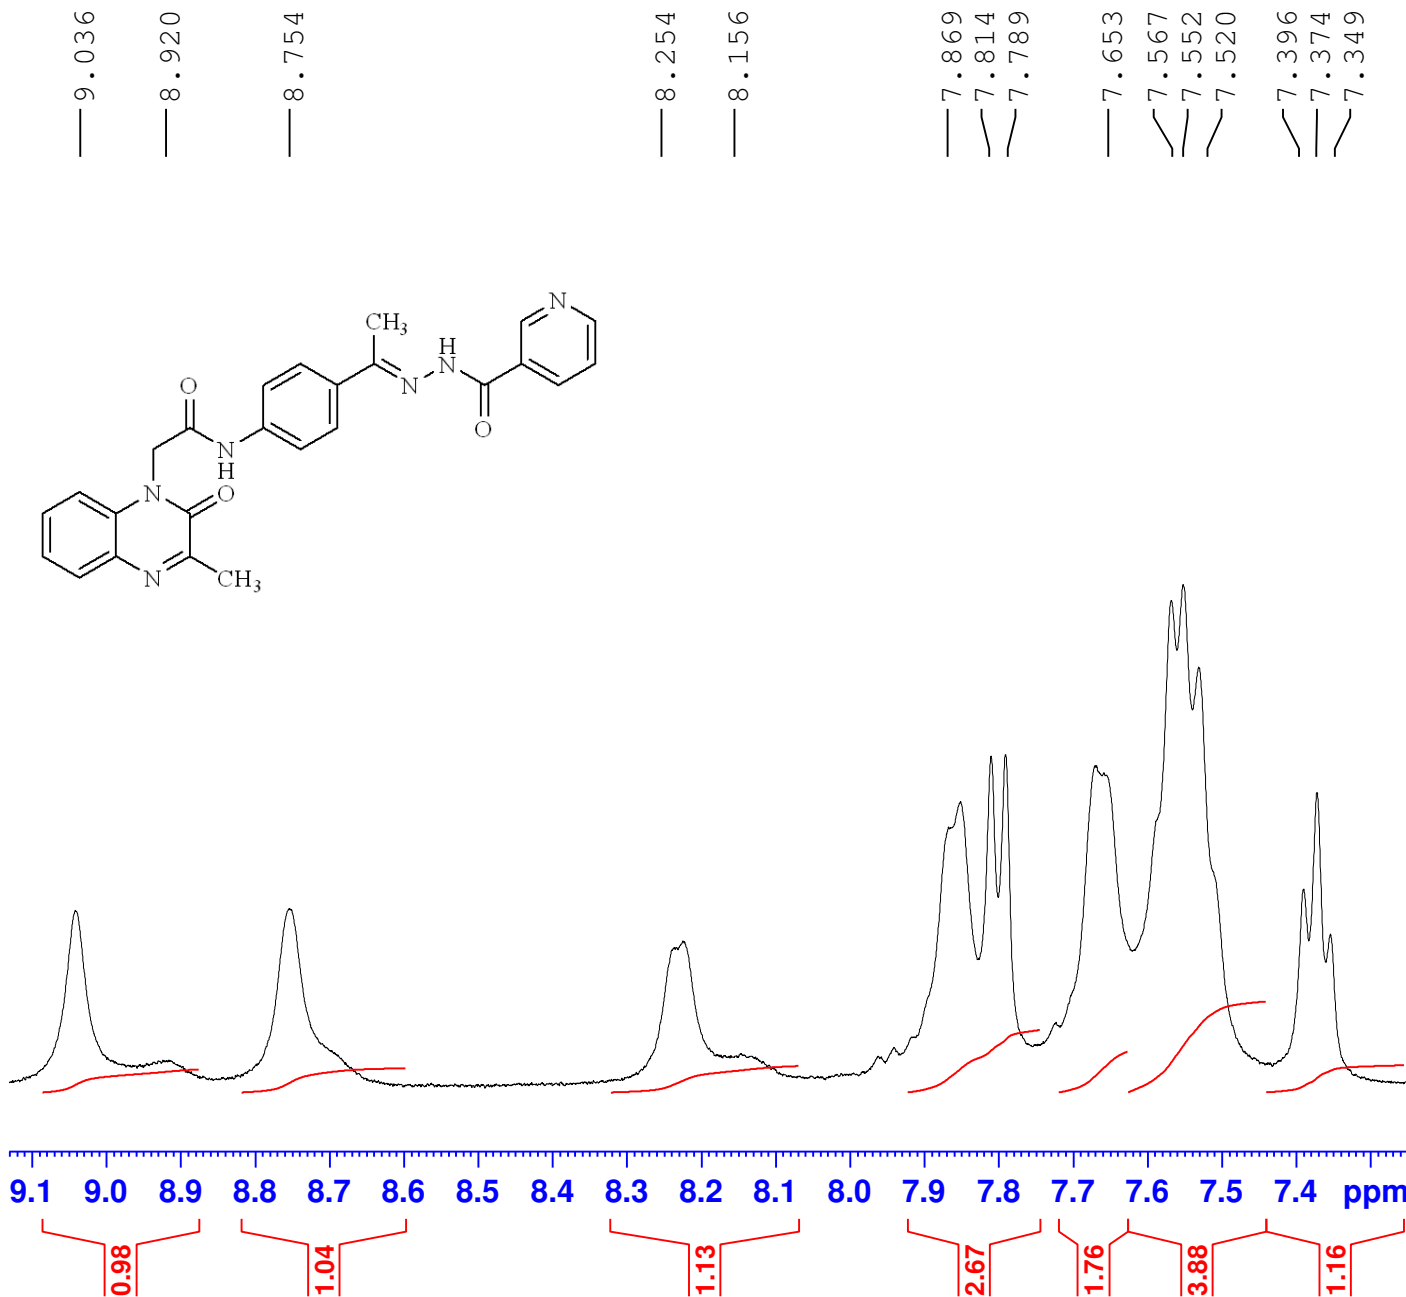

# H<sup>1</sup>NMR of compound (14)



Current Data Parameters  
NAME reda-X10  
EXPNO 1  
PROCNO 1

F2 - Acquisition Parameters  
Date\_ 20180423  
Time 9.21  
INSTRUM spect  
PROBHD 5 mm PABBO BB/  
PULPROG zg30  
TD 65536  
SOLVENT DMSO  
NS 35  
DS 2  
SWH 8012.820 Hz  
FIDRES 0.122266 Hz  
AQ 4.0894465 sec  
RG 205.37  
DW 62.400 usec  
DE 6.50 usec  
TE 298.4 K  
D1 1.00000000 sec  
TD0 1

==== CHANNEL f1 =====  
SFO1 400.1524711 MHz  
NUC1 1H  
P1 12.00 usec  
PLW1 18.00000000 W

F2 - Processing parameters  
SI 65536  
SF 400.1500000 MHz  
WDW EM  
SSB 0  
LB 0.30 Hz  
GB 0  
PC 1.00

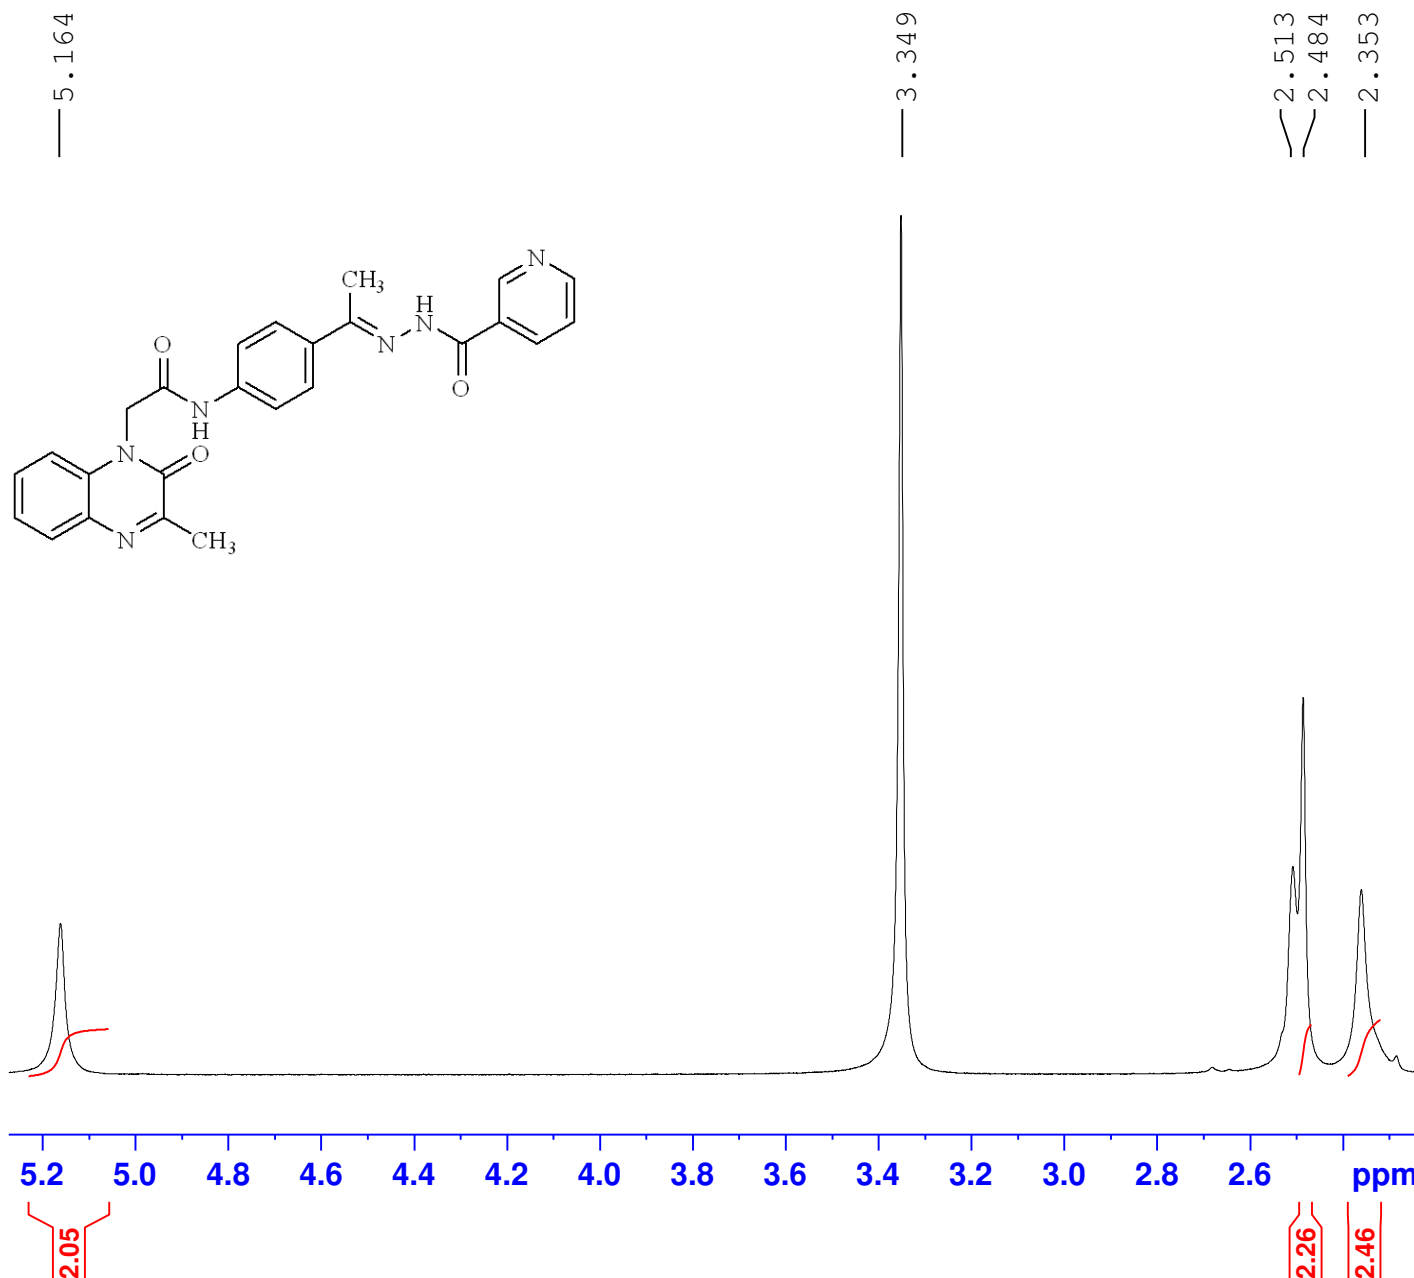

# H<sup>1</sup>NMR(D<sub>2</sub>O) of compound (14)

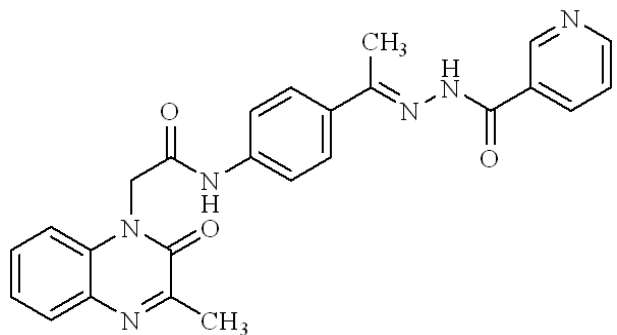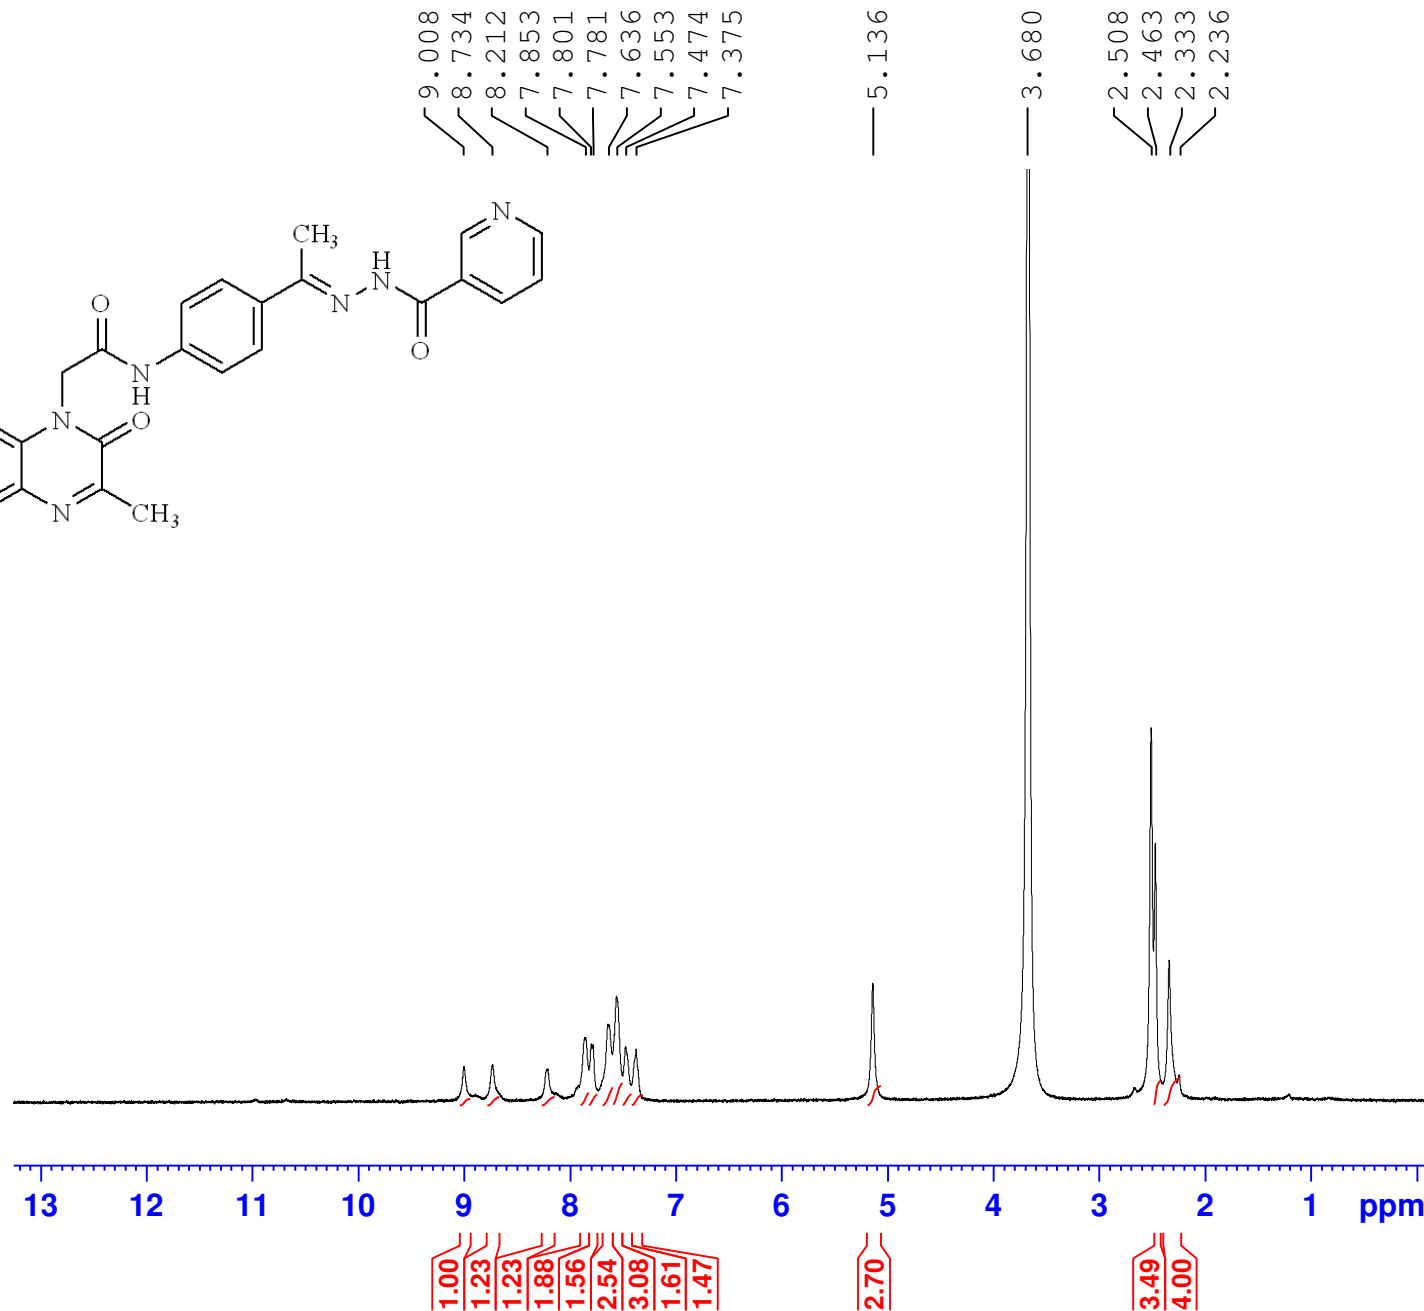

Current Data Parameters  
 NAME reda-X10-d2o  
 EXPNO 1  
 PROCNO 1

F2 - Acquisition Parameters  
 Date\_ 20180423  
 Time 9.33  
 INSTRUM spect  
 PROBHD 5 mm PABBO BB/  
 PULPROG zg30  
 TD 65536  
 SOLVENT DMSO  
 NS 42  
 DS 2  
 SWH 8012.820 Hz  
 FIDRES 0.122266 Hz  
 AQ 4.0894465 sec  
 RG 205.37  
 DW 62.400 usec  
 DE 6.50 usec  
 TE 298.2 K  
 D1 1.00000000 sec  
 TD0 1

==== CHANNEL f1 =====  
 SFO1 400.1524711 MHz  
 NUC1 1H  
 P1 12.00 usec  
 PLW1 18.00000000 W

F2 - Processing parameters  
 SI 65536  
 SF 400.1500000 MHz  
 WDW EM  
 SSB 0  
 LB 0.30 Hz  
 GB 0  
 PC 1.00

# H<sup>1</sup>NMR of compound (15)

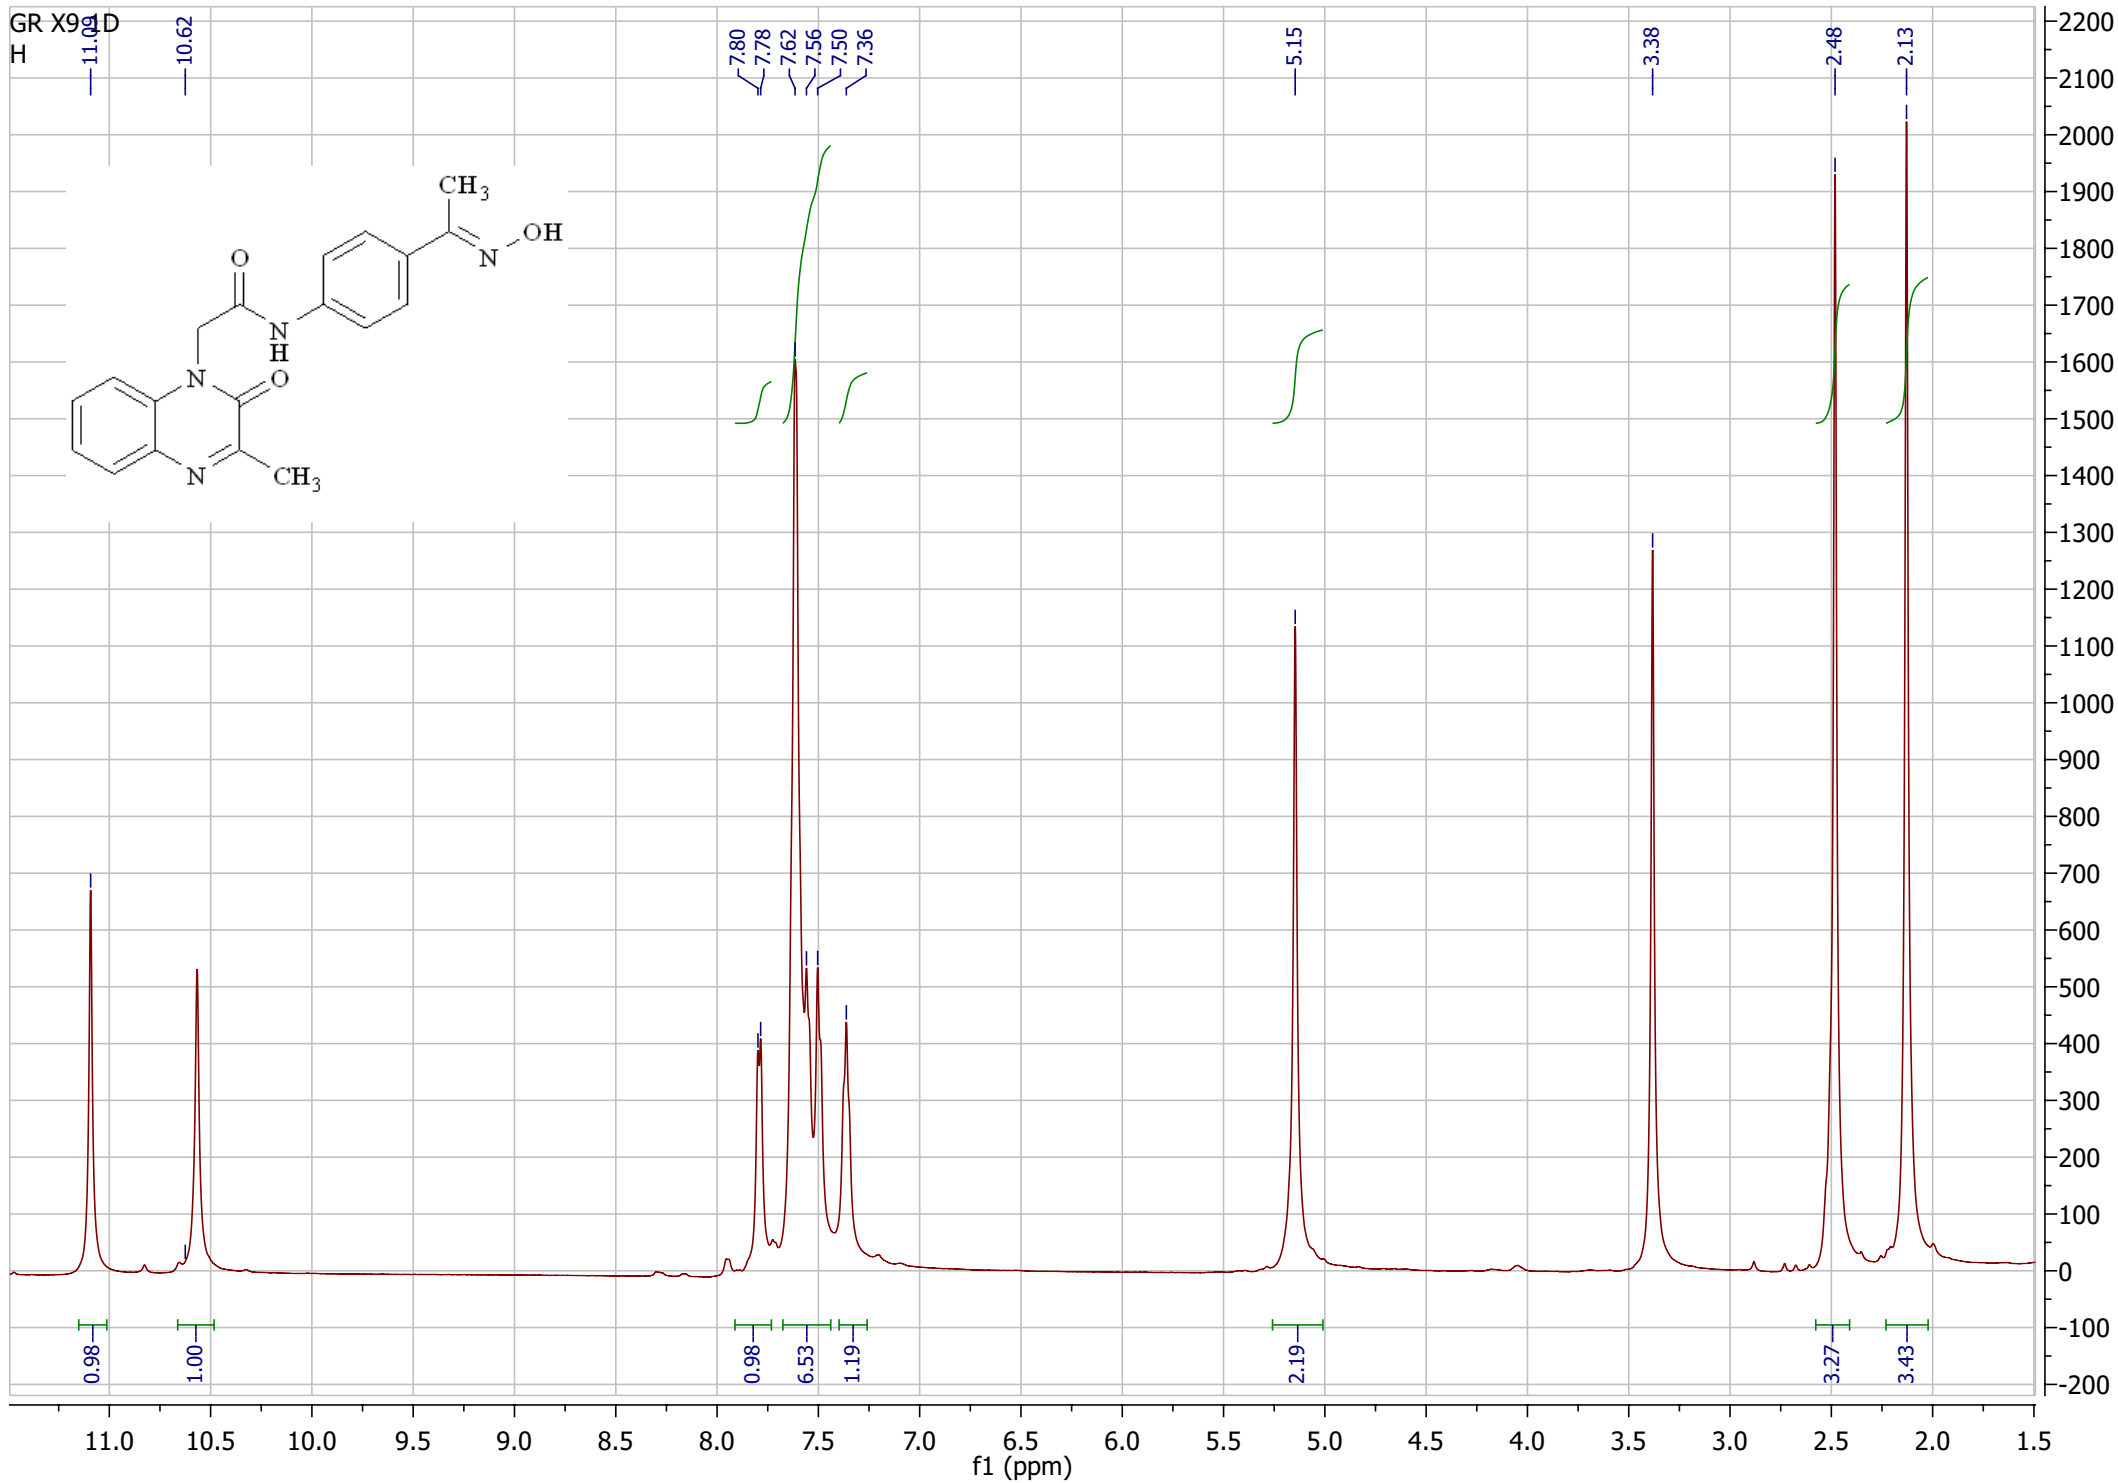



IR of compound 15

SHIMADZU

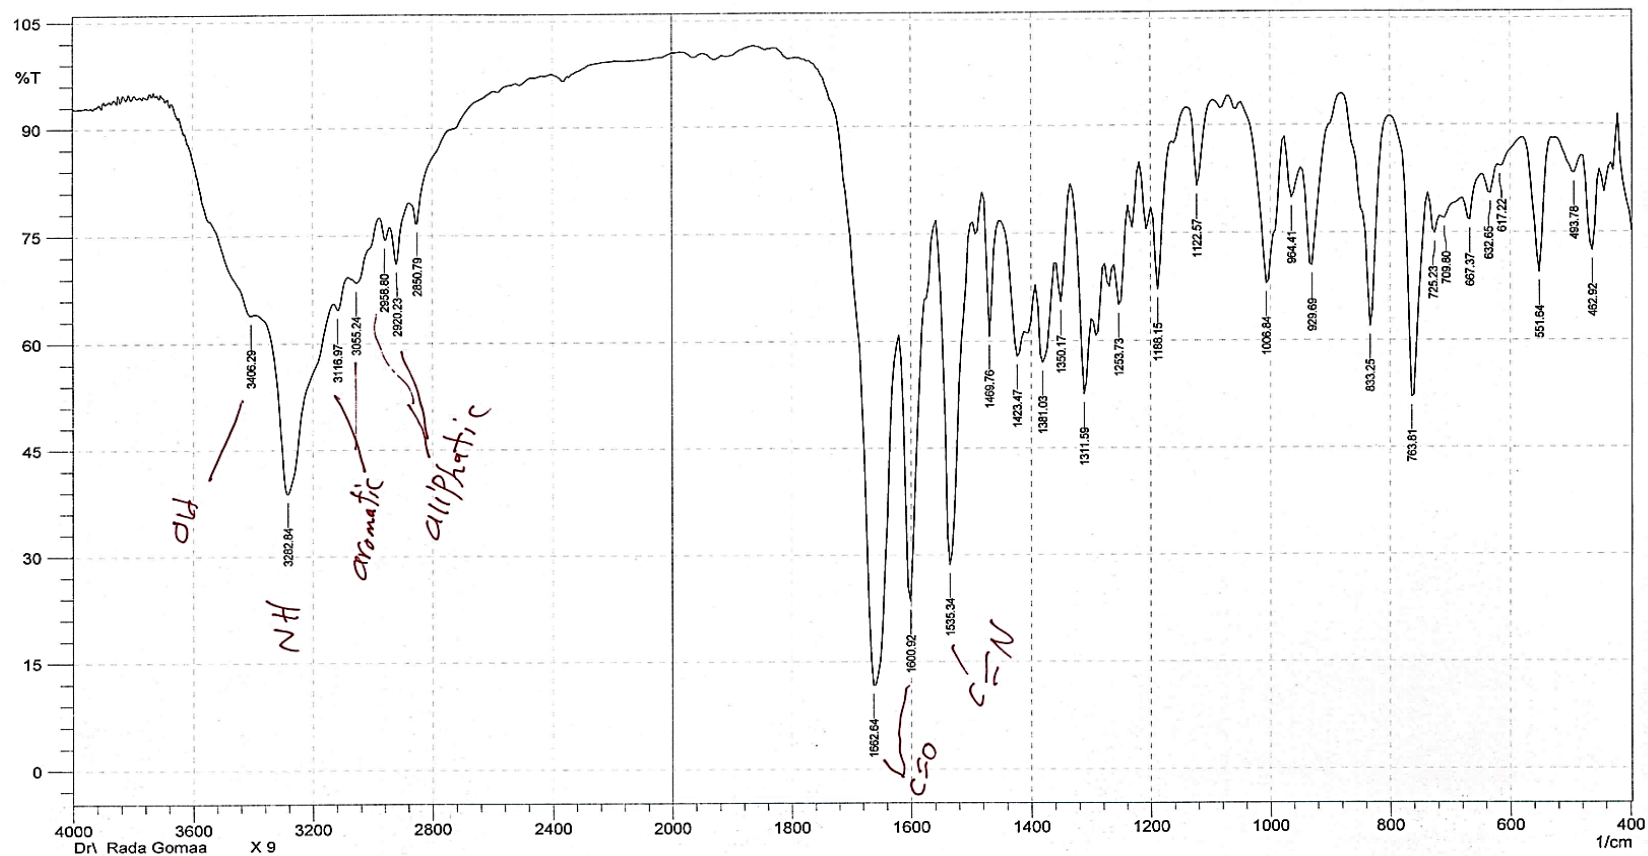

Comment;  
Dr\ Rada Goma X 9

No. of Scans; 8  
Resolution; 8 [1/cm]

Date/Time; 11/11/2018 11:55:23 AM  
User; usama

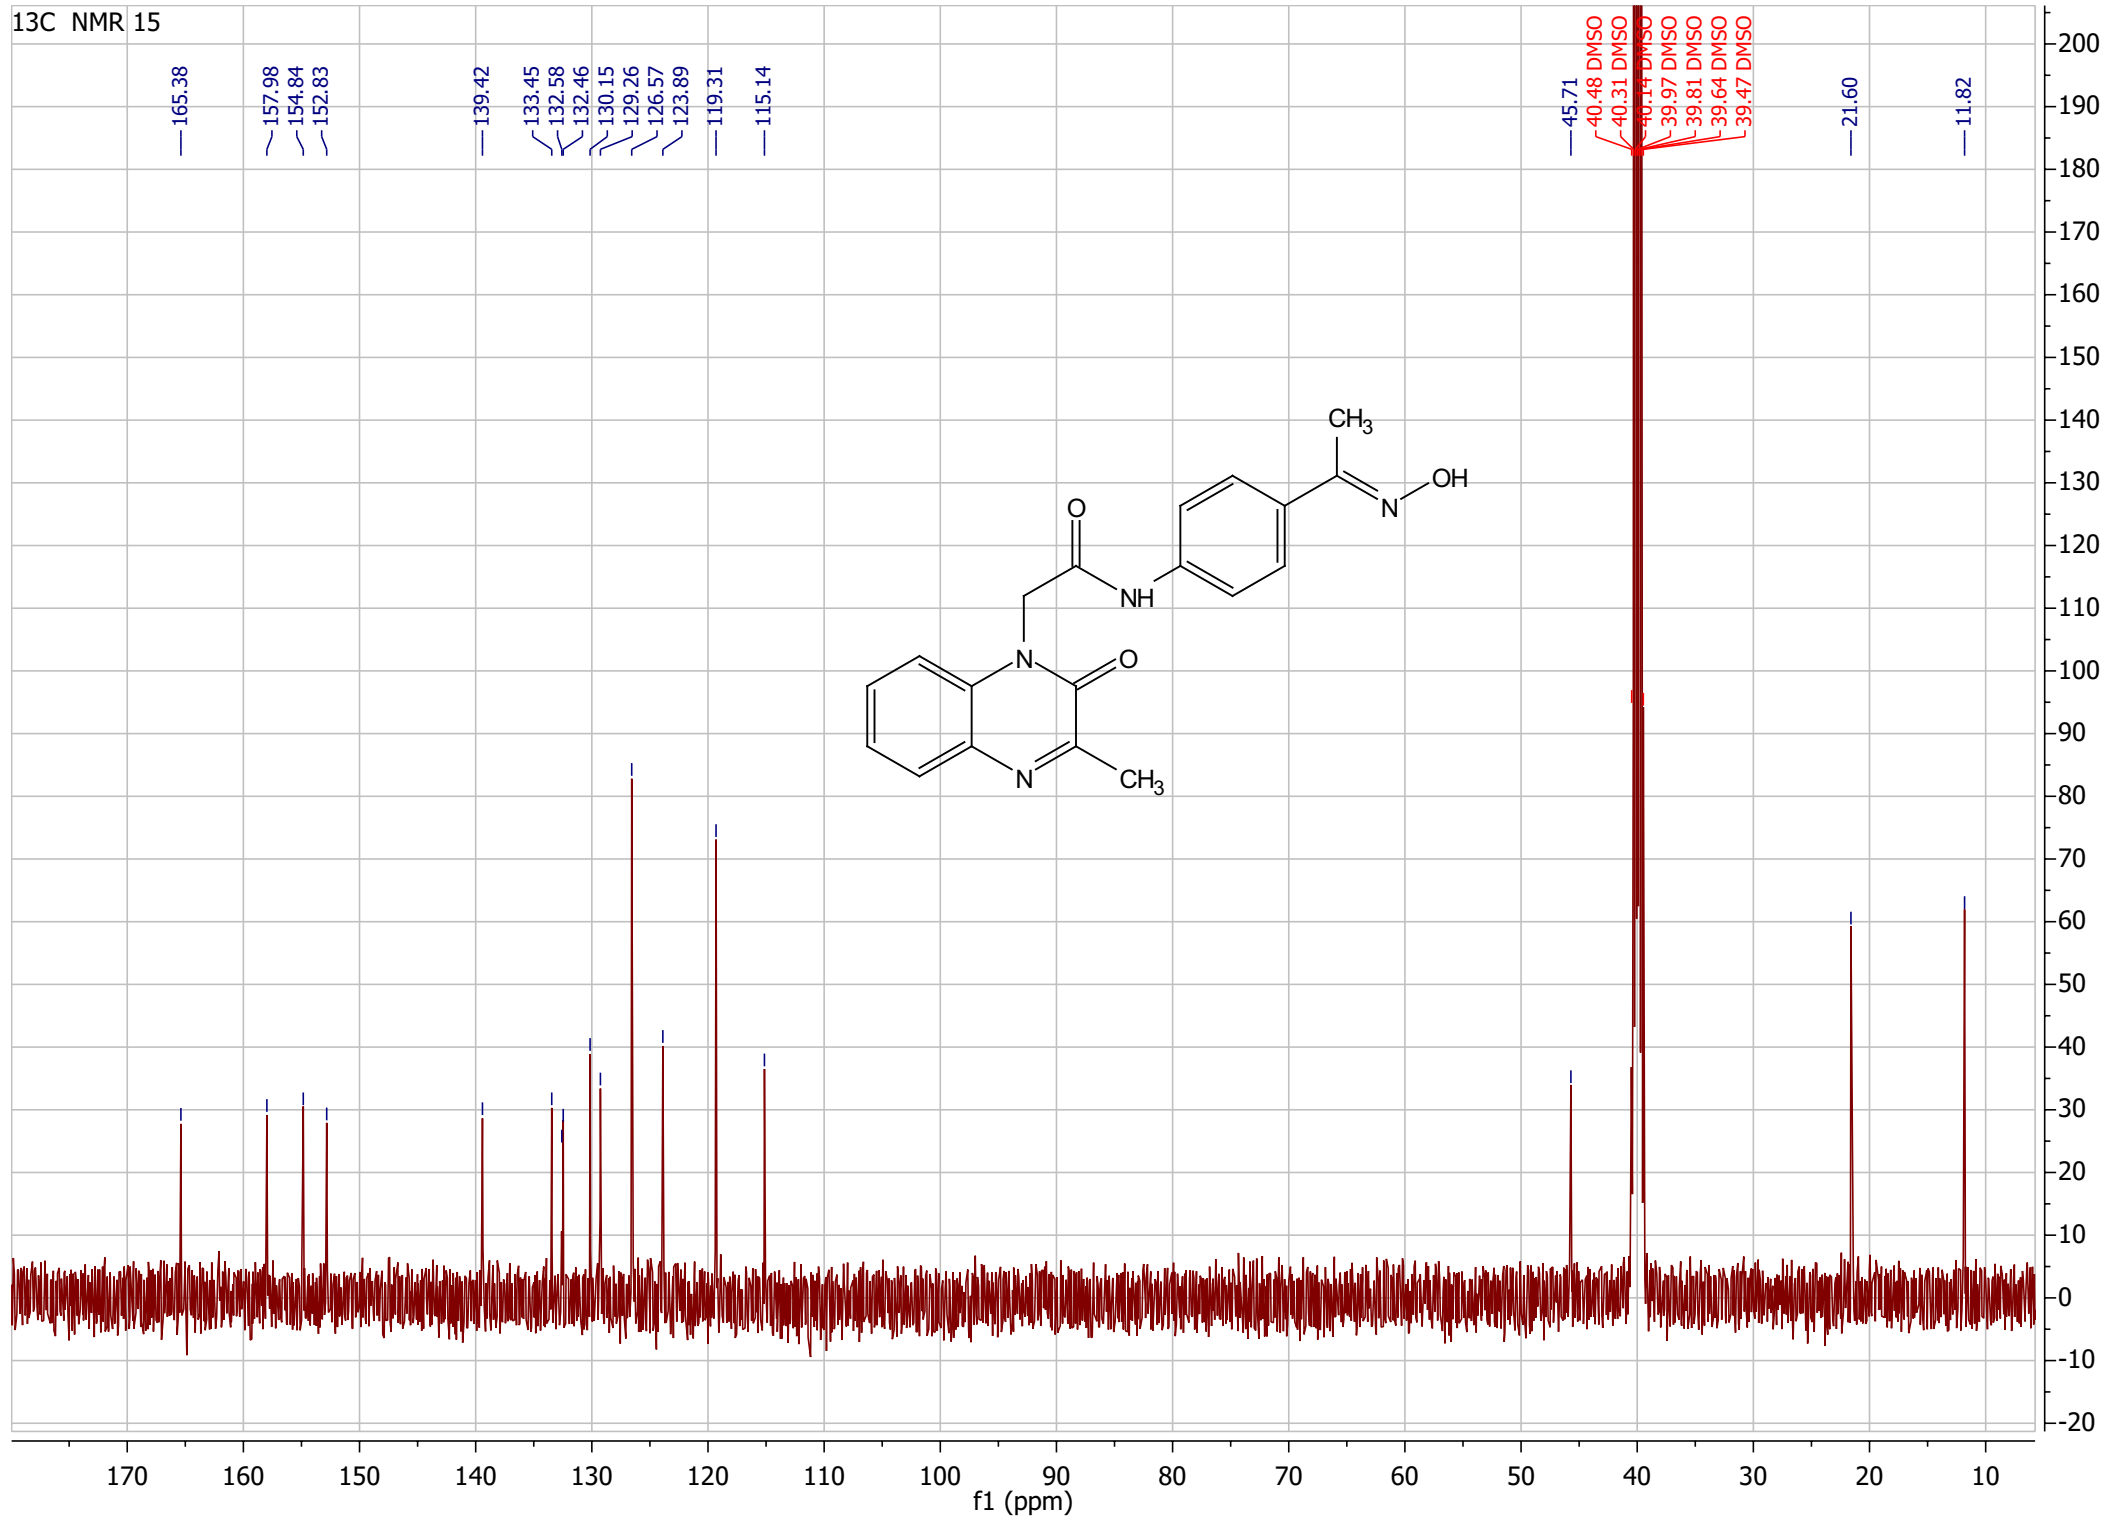

DEPT NMR 15

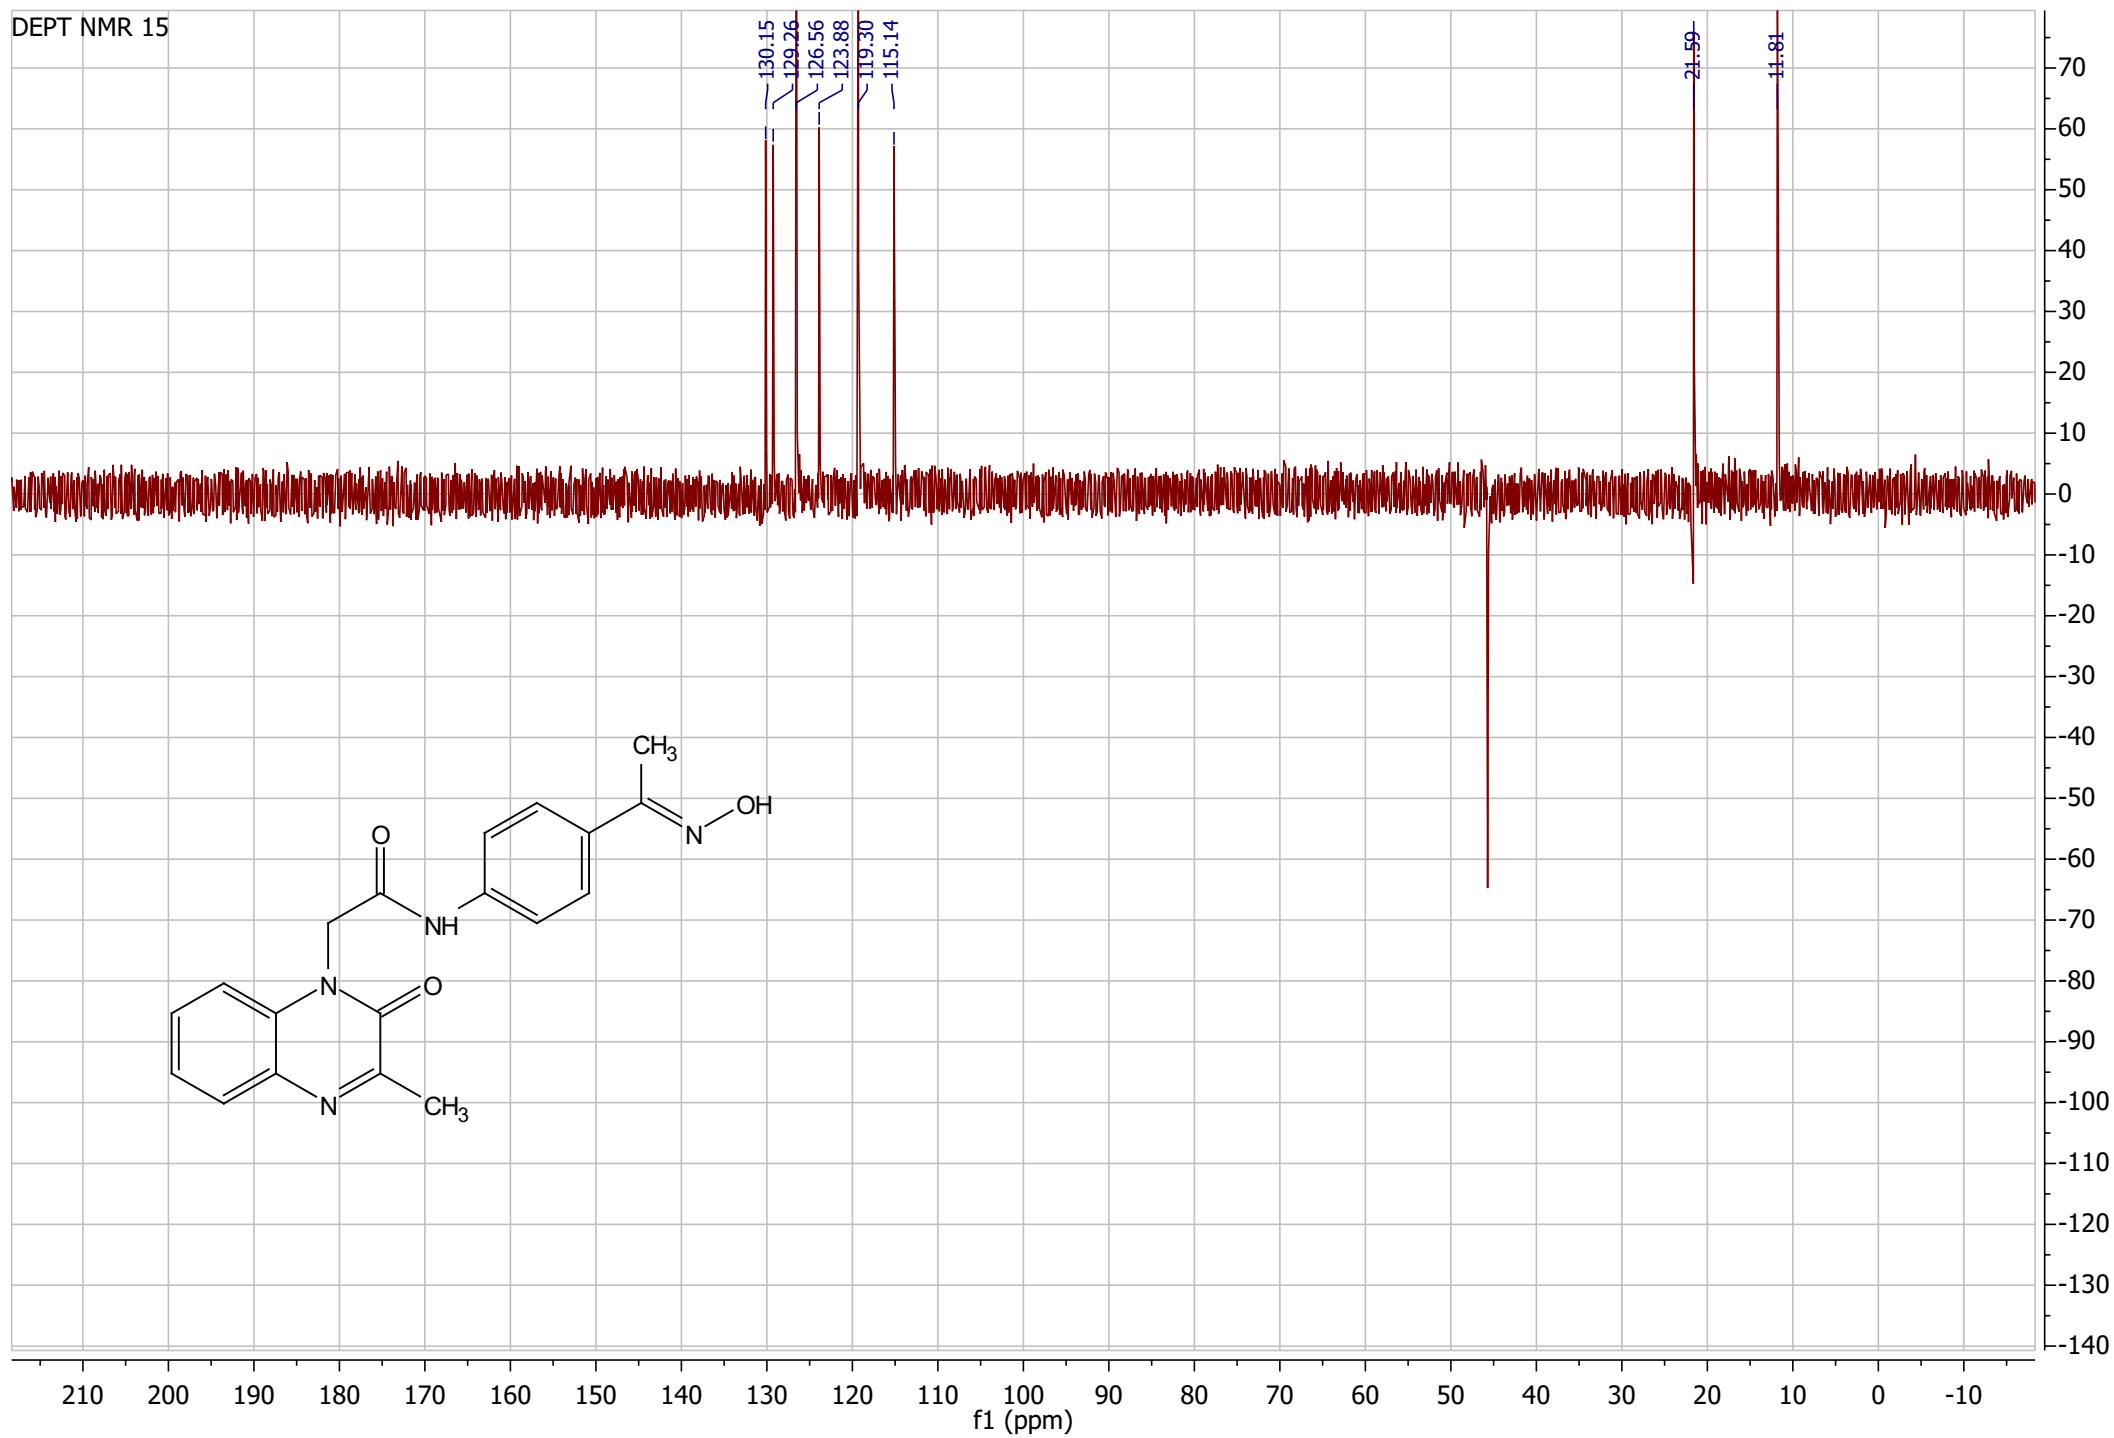

Supplement: d1nj02509k1.pdf [file d1nj02509k1.pdf]
